# Supplementary material for: Spatial differences and temporal changes in illicit drug use in Europe quantified by wastewater analysis
Source: PubMed Central journal article supplement — Addiction. 2014 May 27;109(8):1338–52. doi: 10.1111/add.12570 (PMC4204159; doi:10.1111/add.12570), 2014-05-27

# BE loads % per weekday

Antwerp Z.

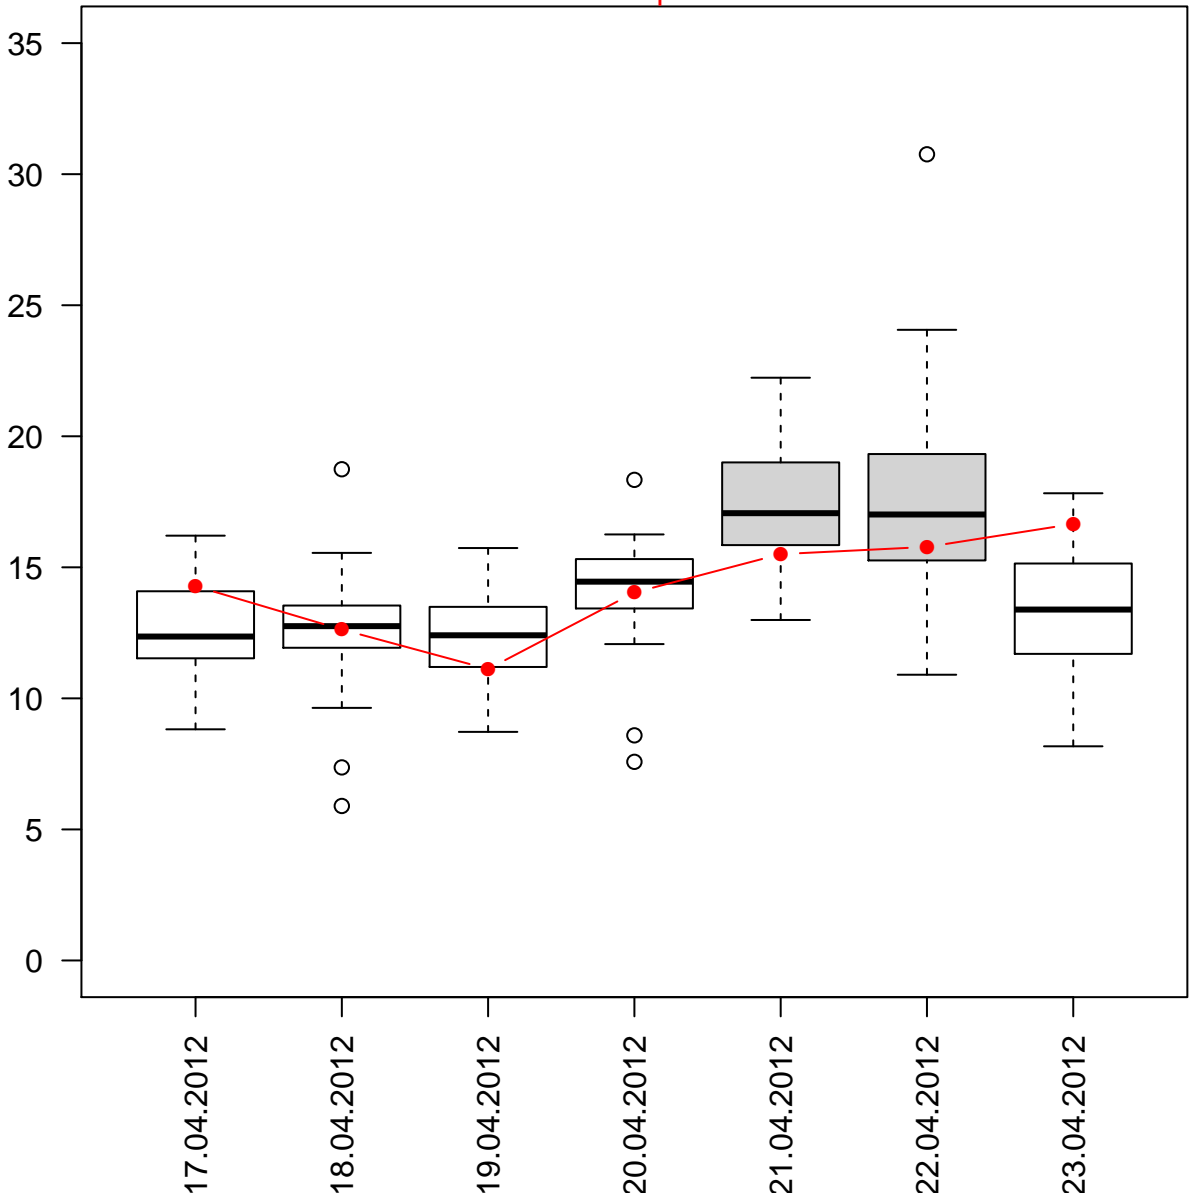

# BE loads % per weekday

Antwerp D.

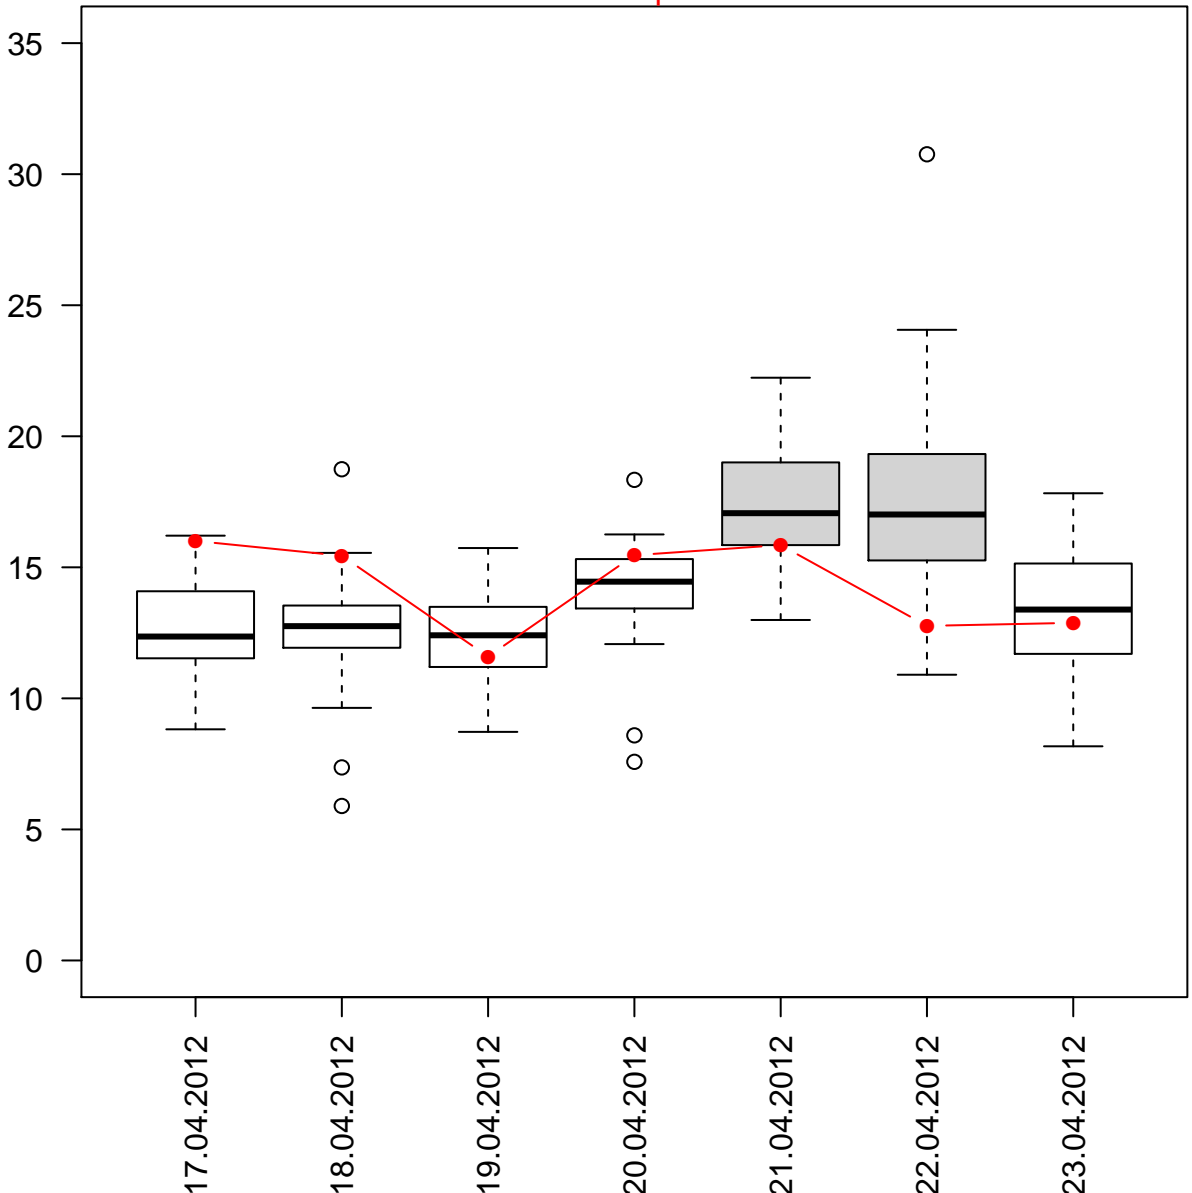

# BE loads % per weekday

Brussels

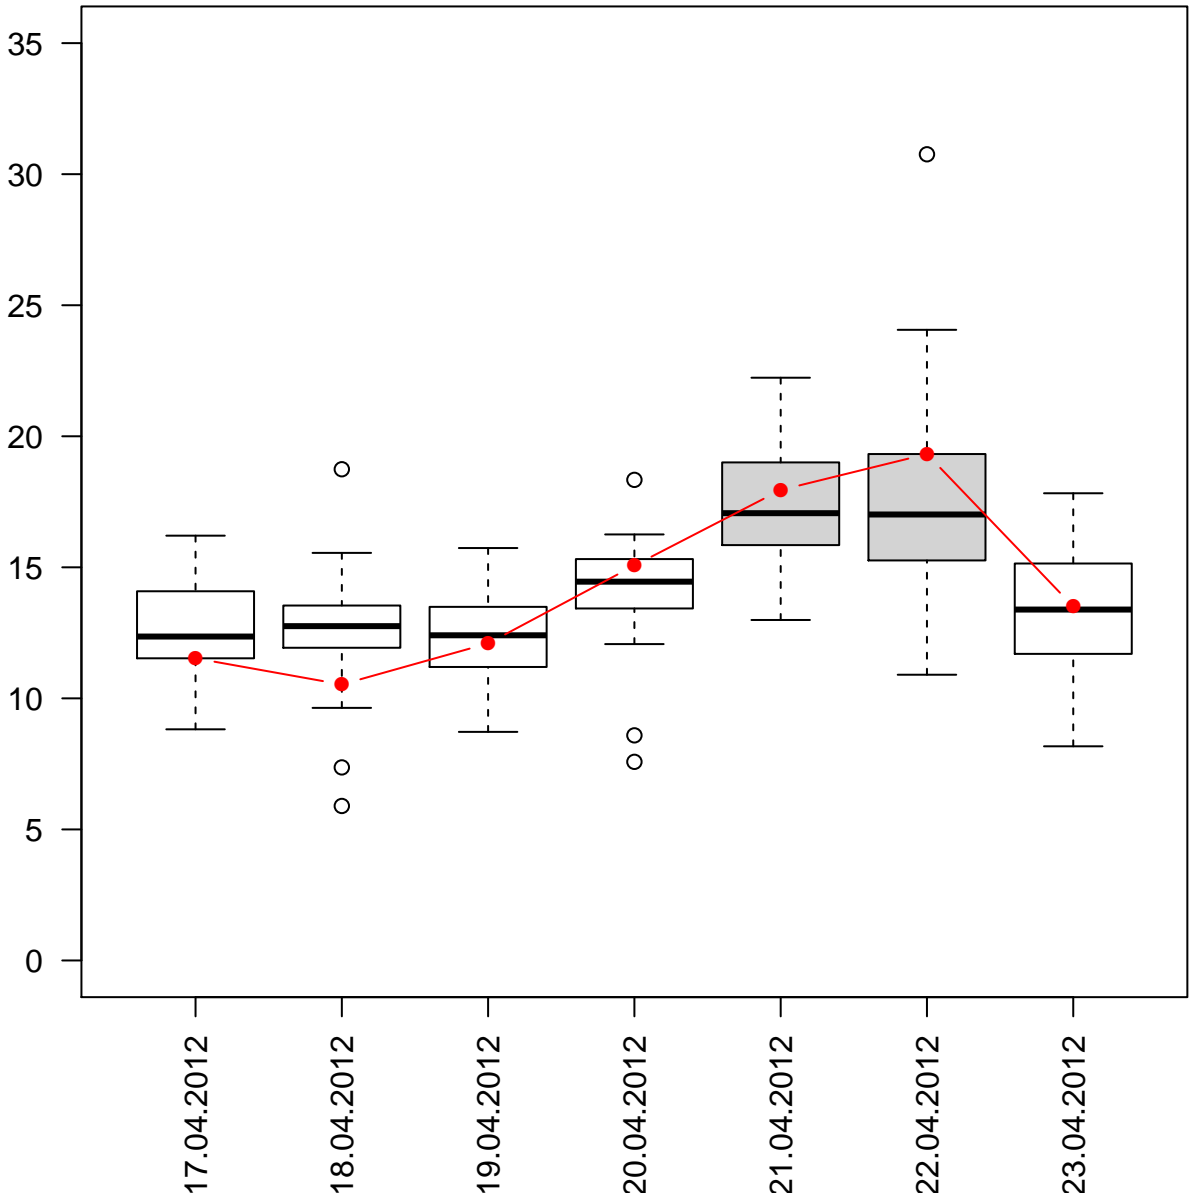

# BE loads % per weekday

Basel

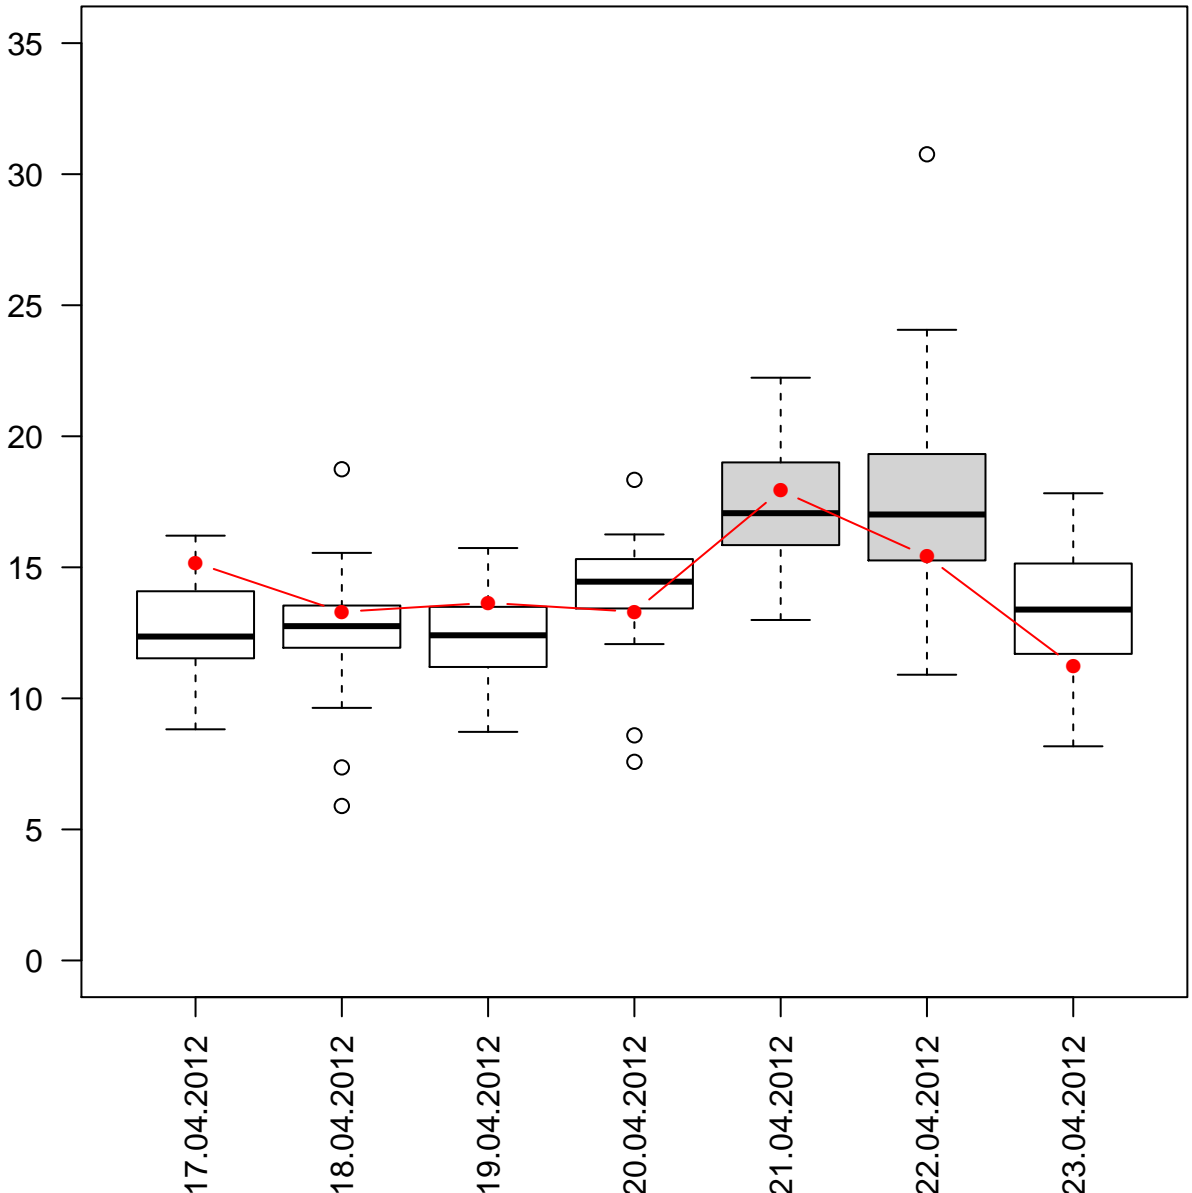

# BE loads % per weekday

Berne

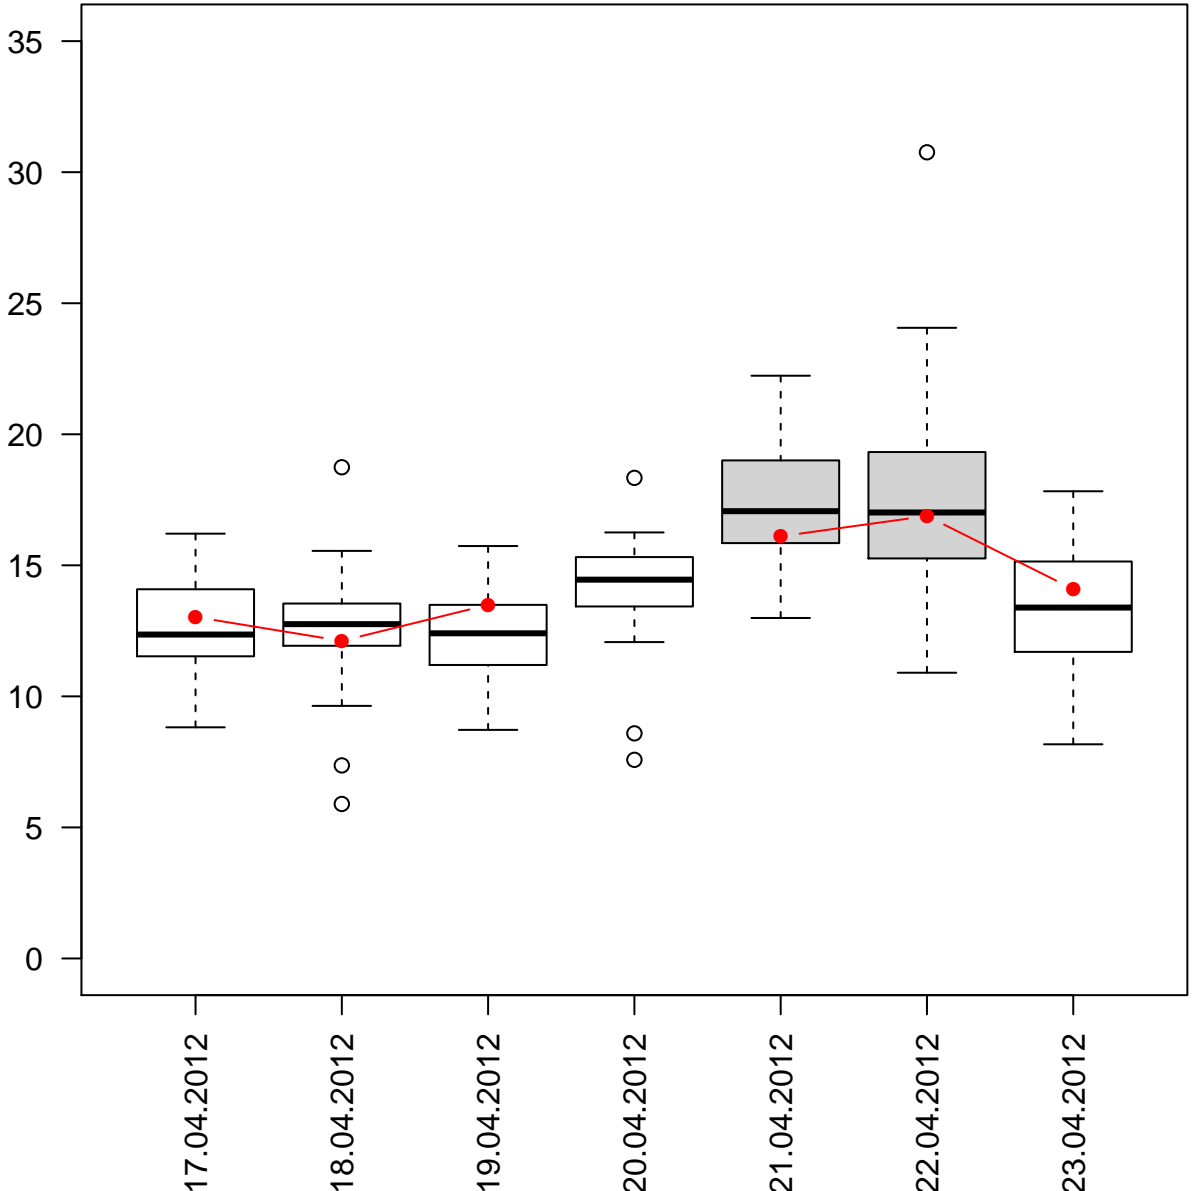

# BE loads % per weekday

Geneva

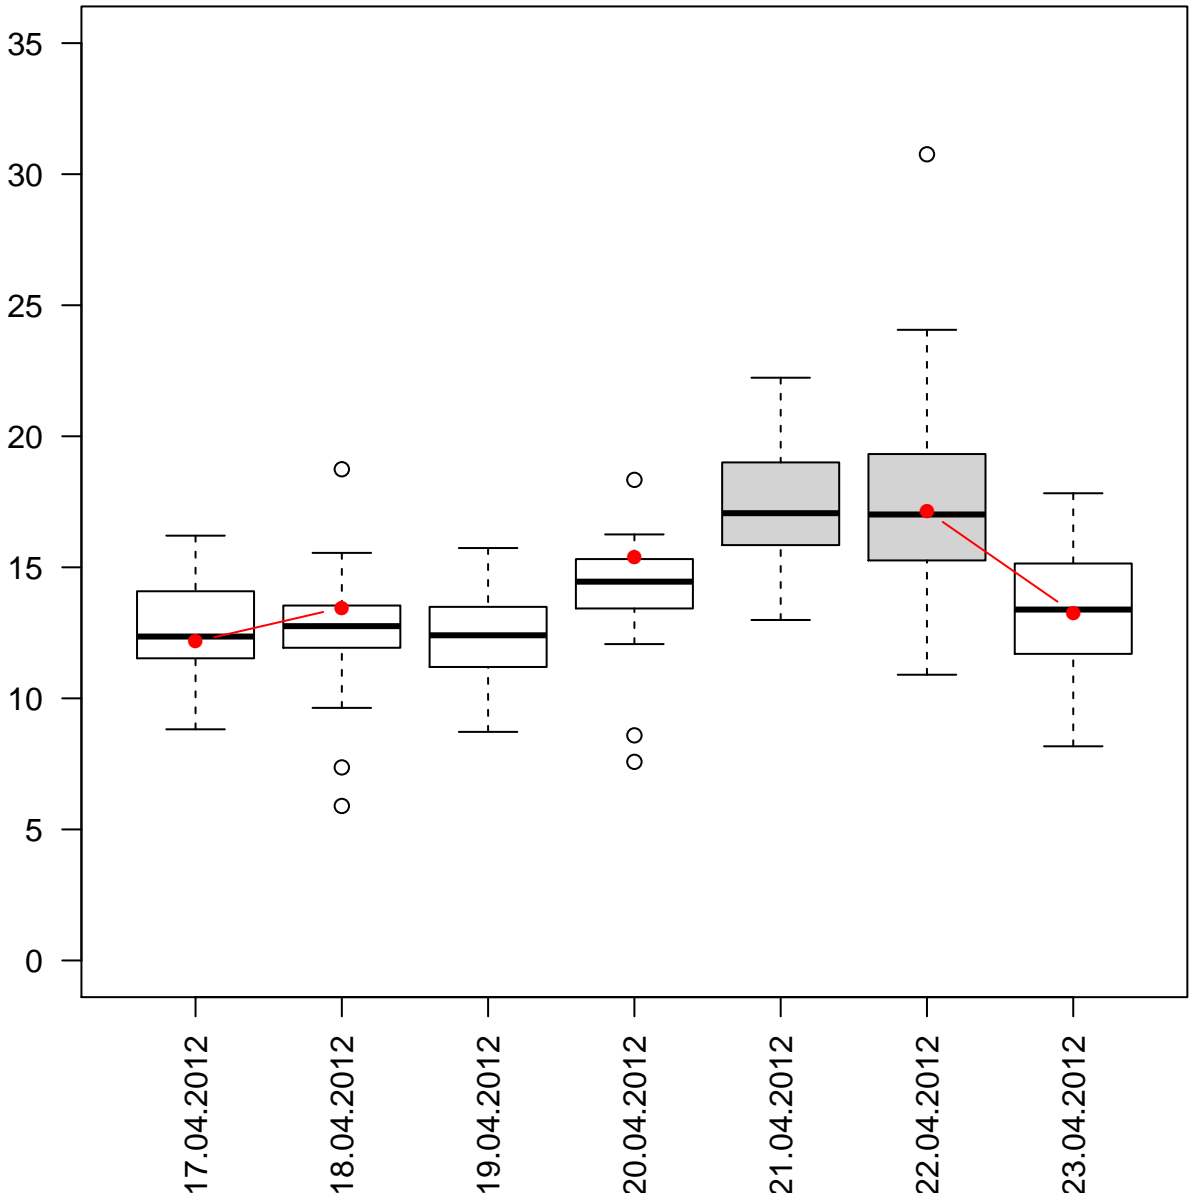

# BE loads % per weekday

St.Gallen A.

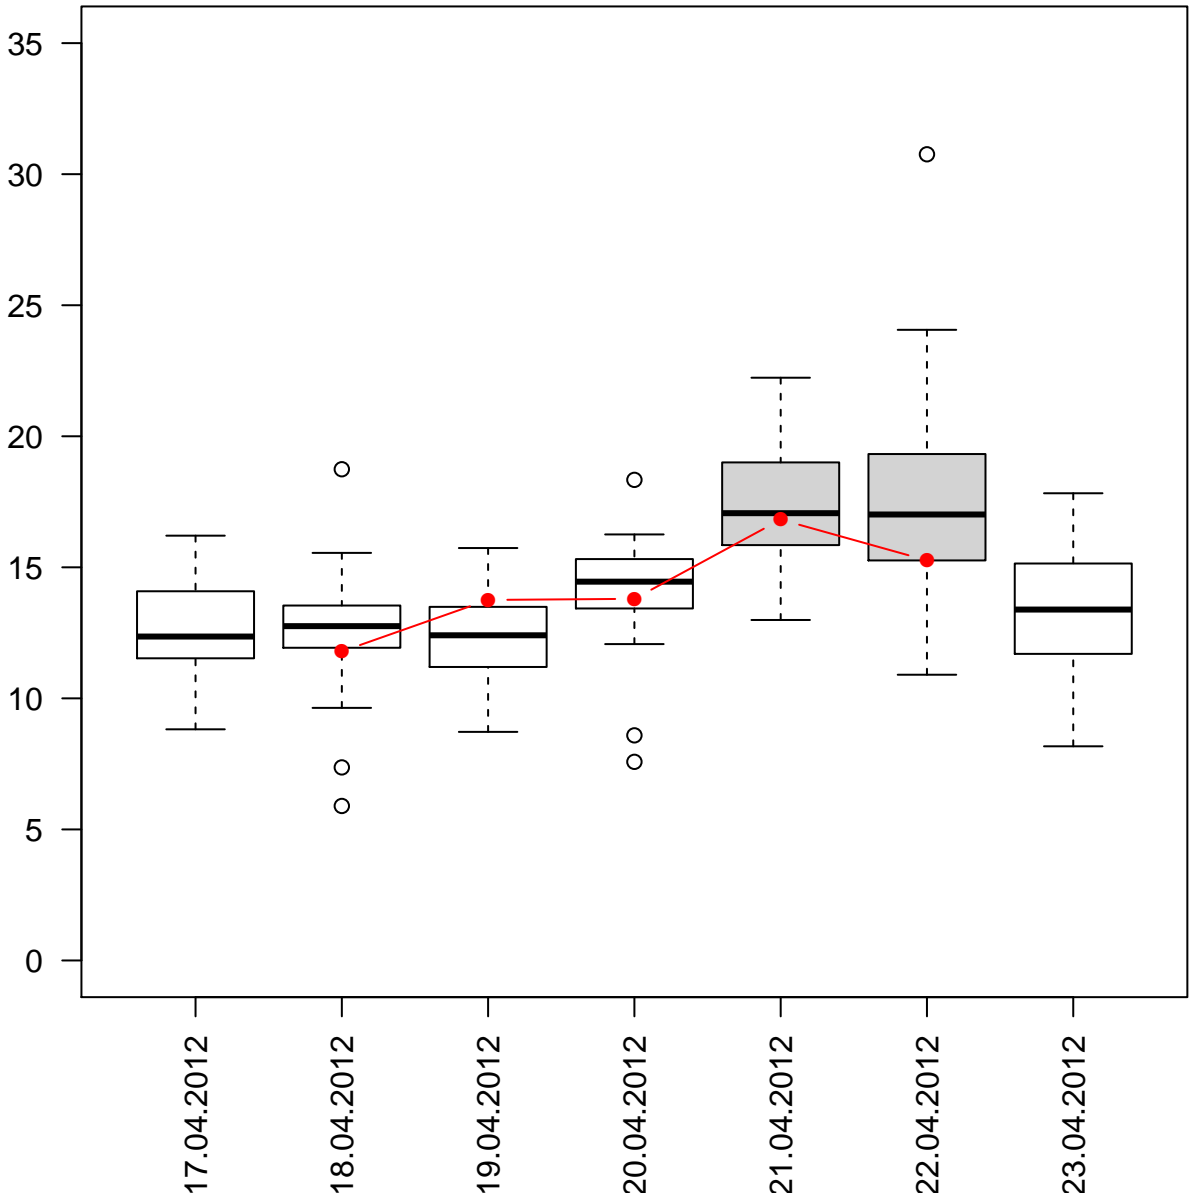

# BE loads % per weekday

St.Gallen H.

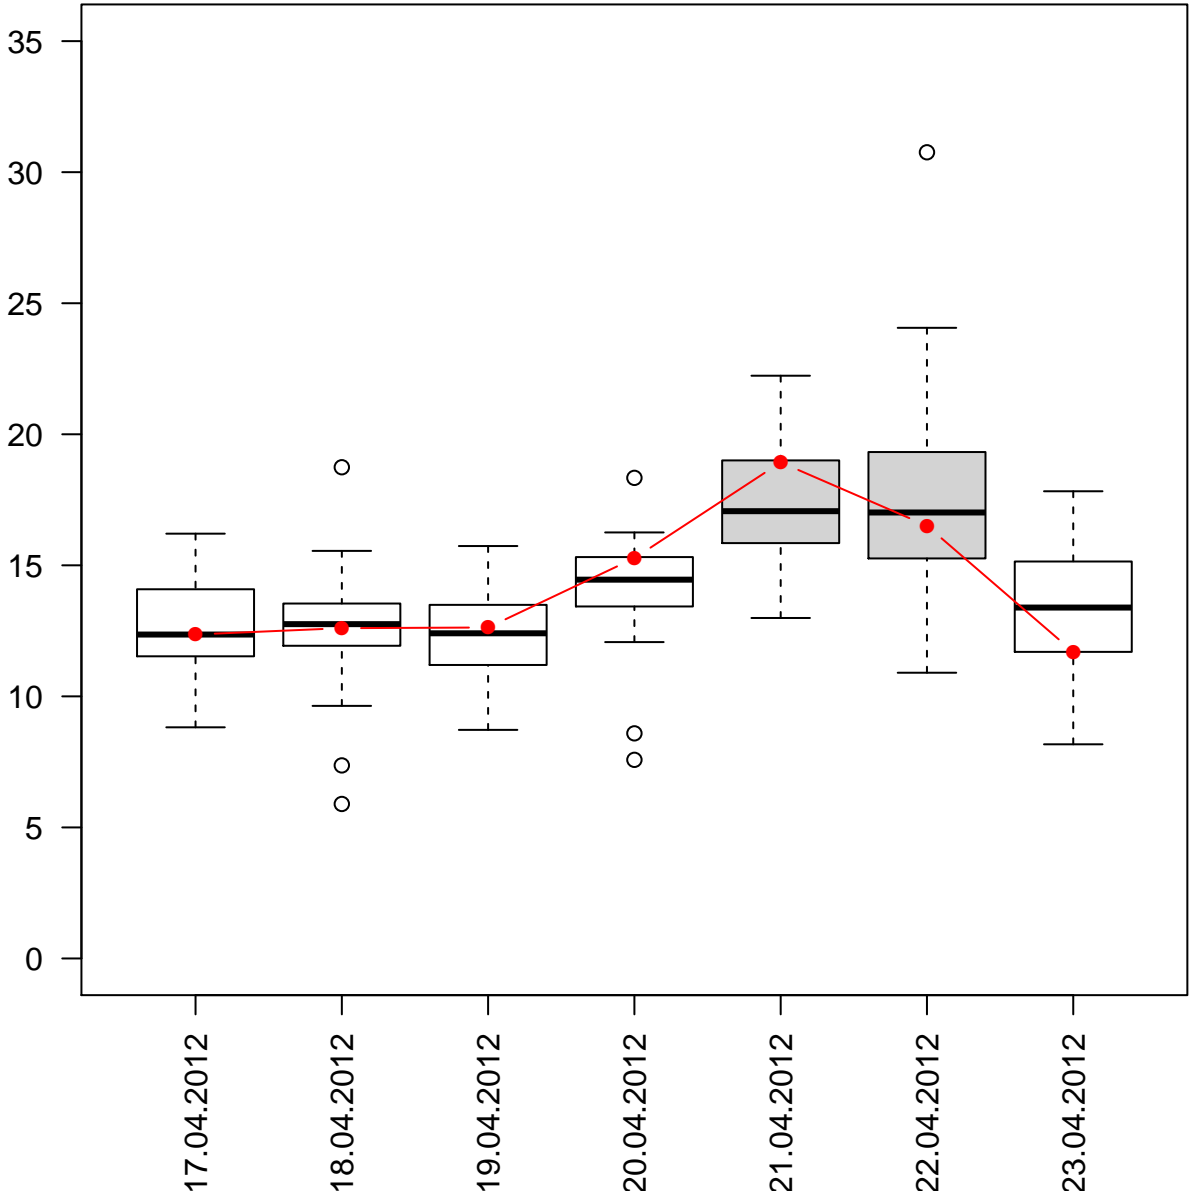



# BE loads % per weekday

Zurich

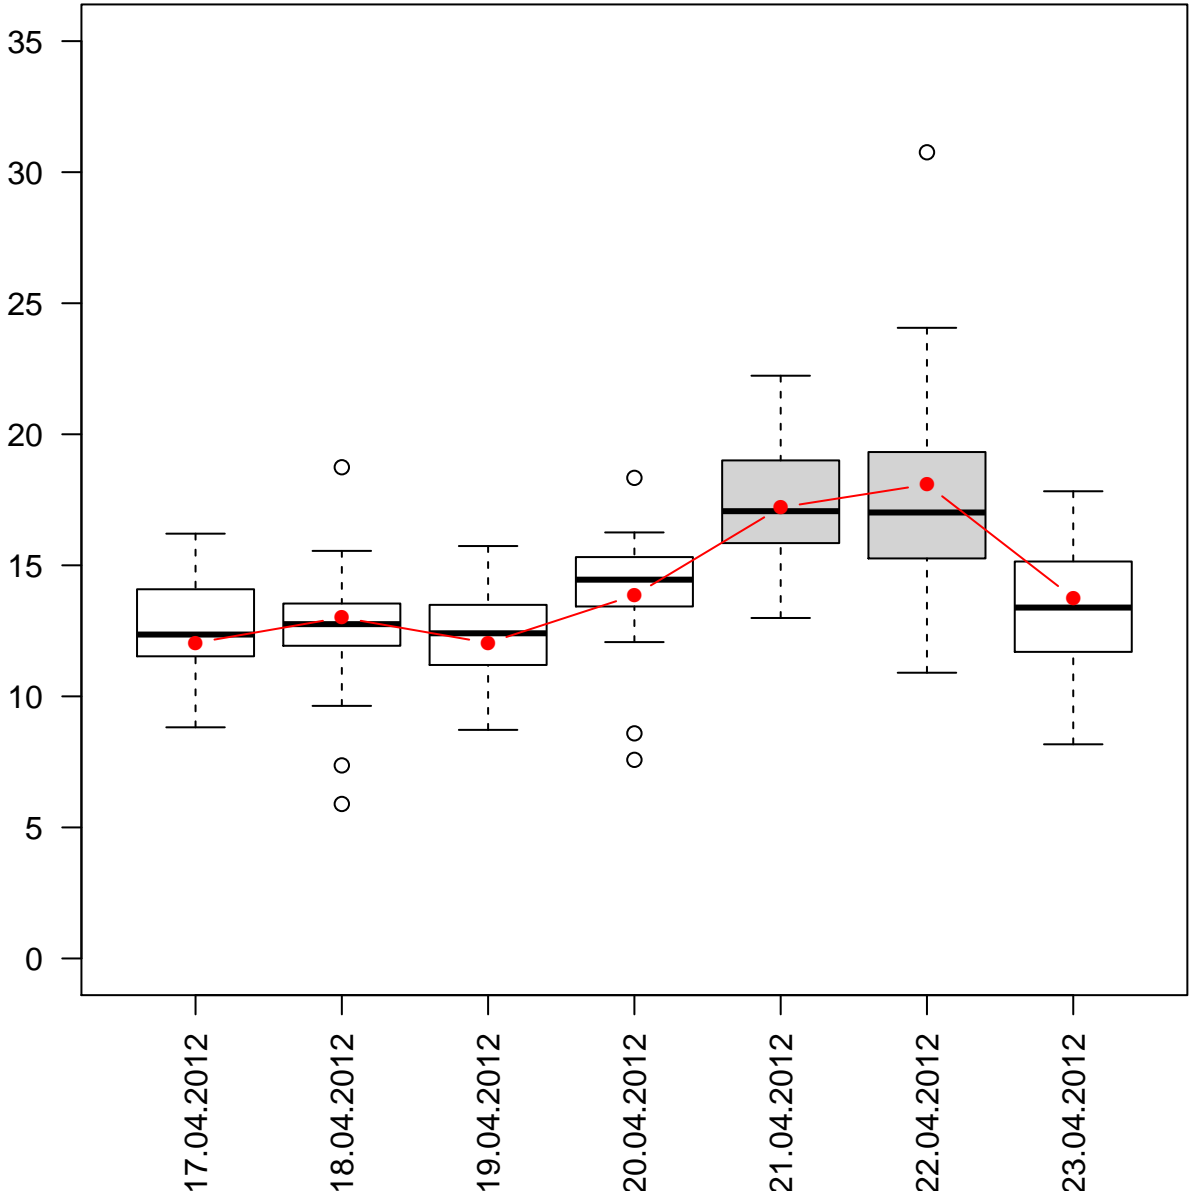

# BE loads % per weekday

Budweis

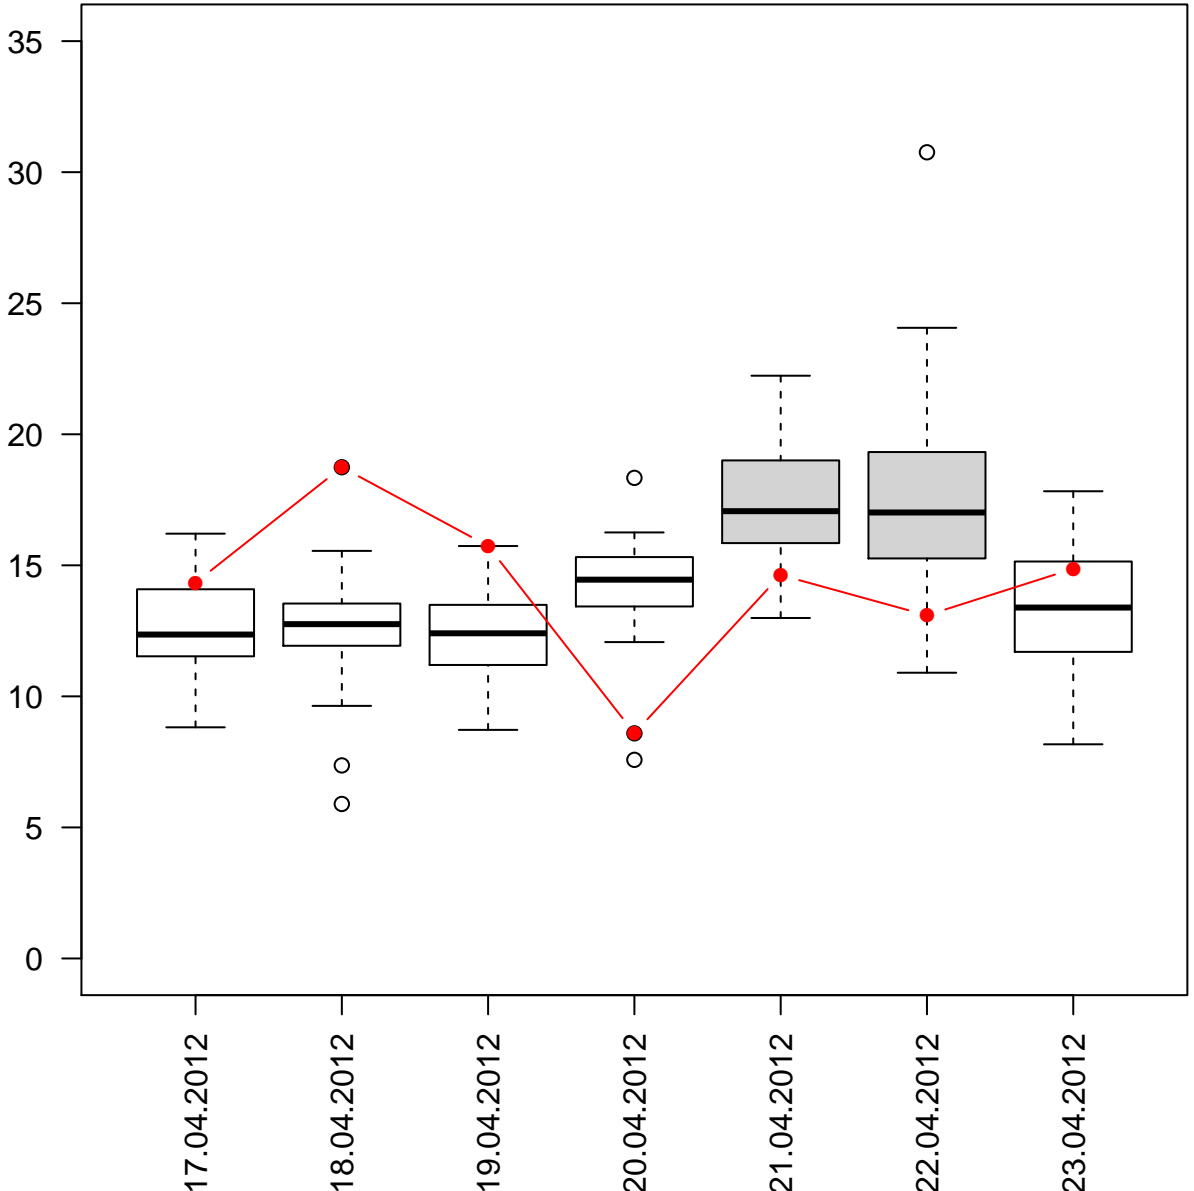

# BE loads % per weekday

Prague

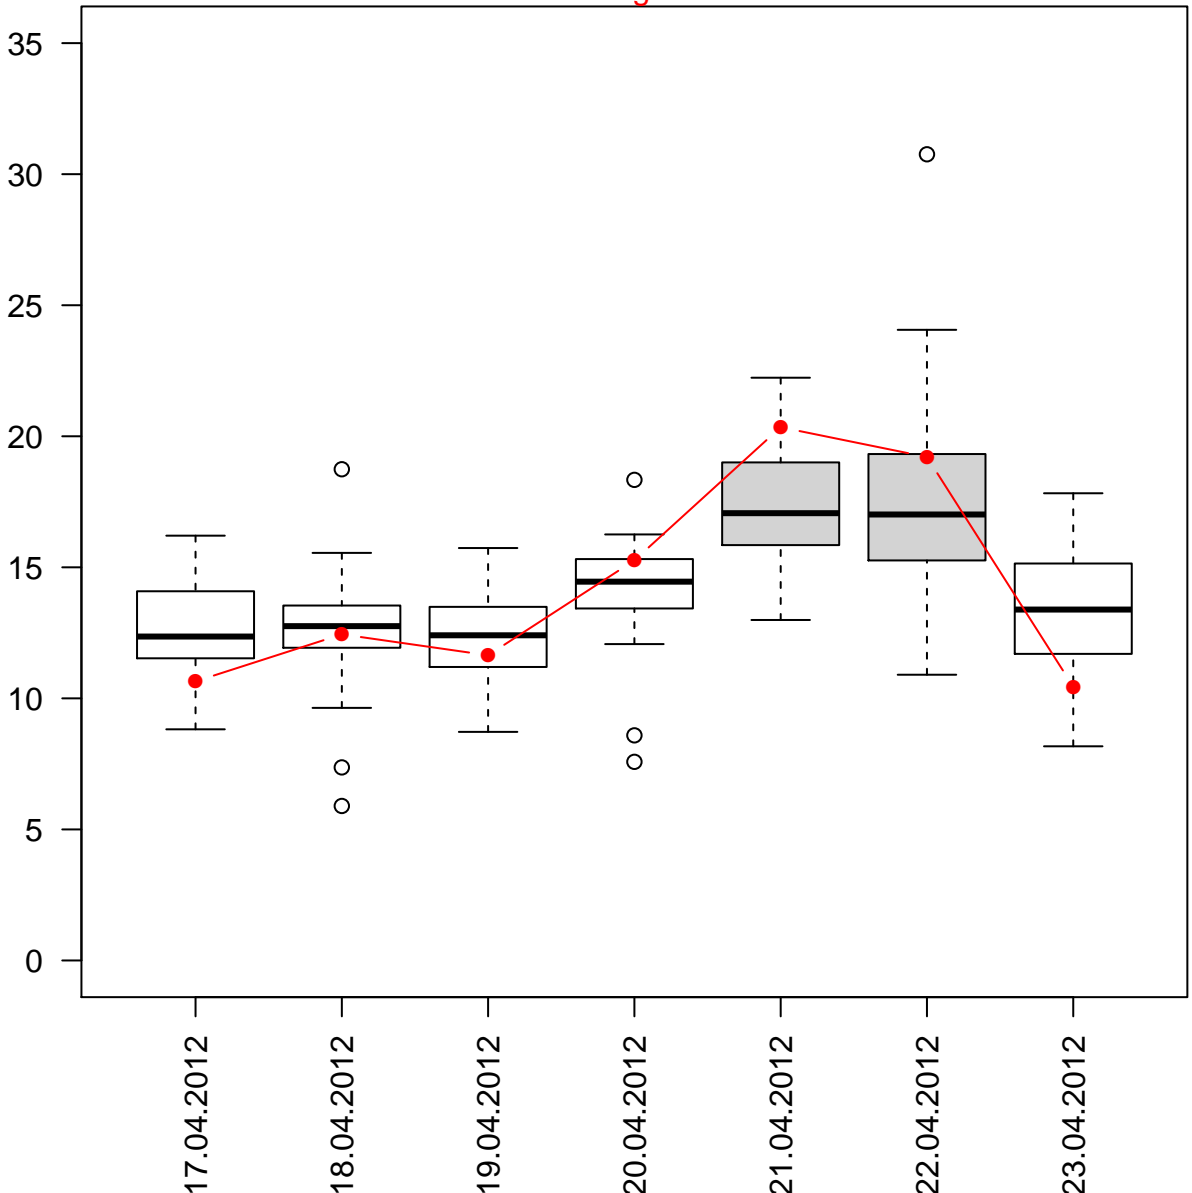

# BE loads % per weekday

Castellon

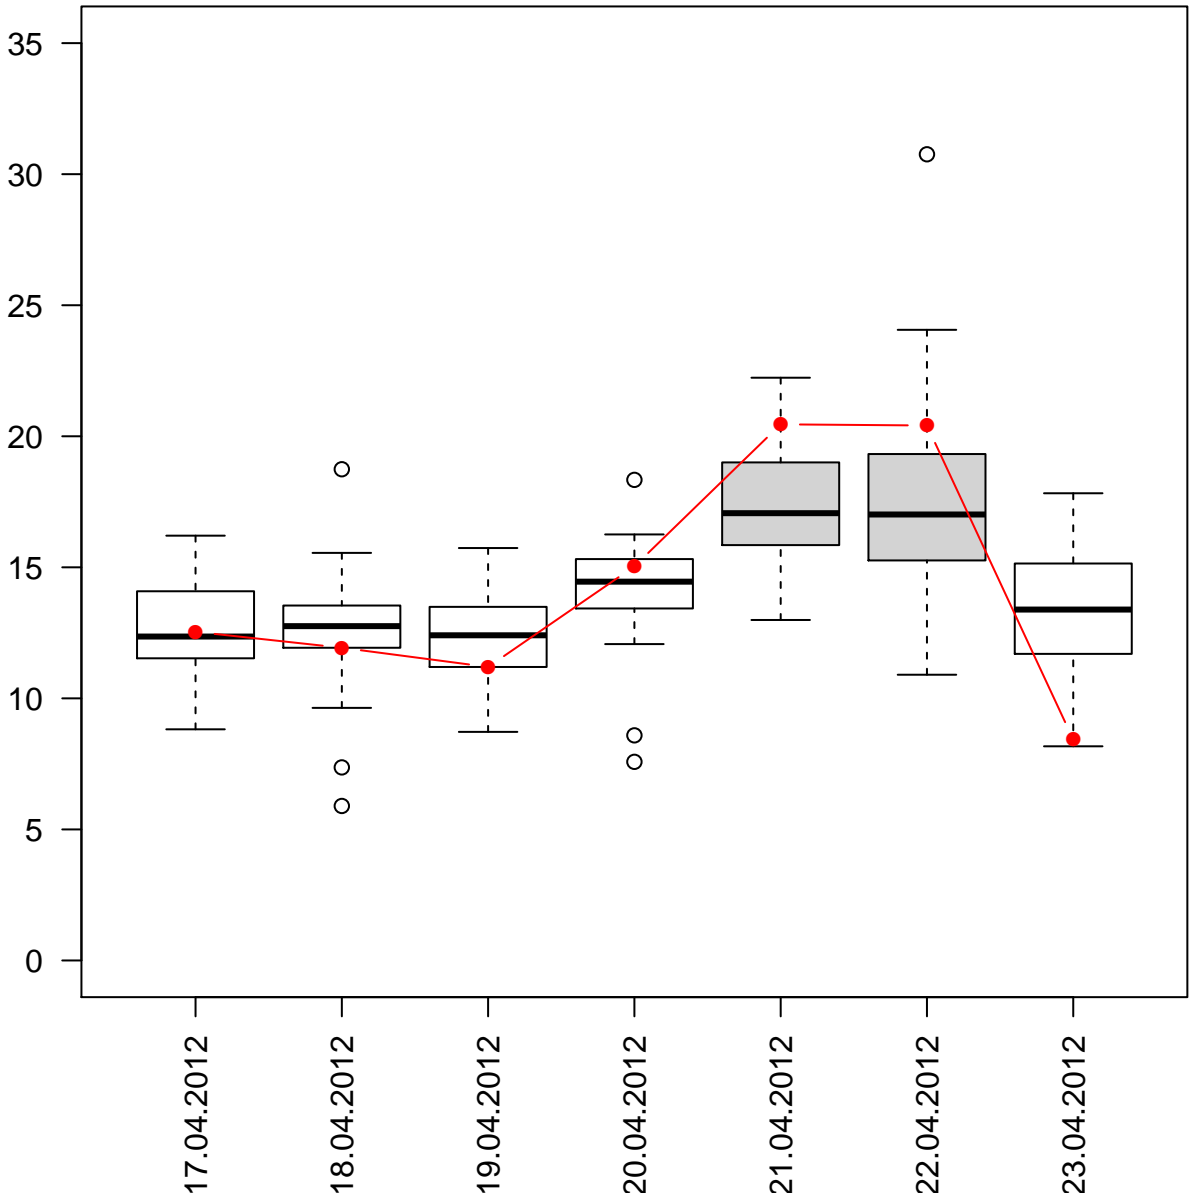

# BE loads % per weekday

Santiago

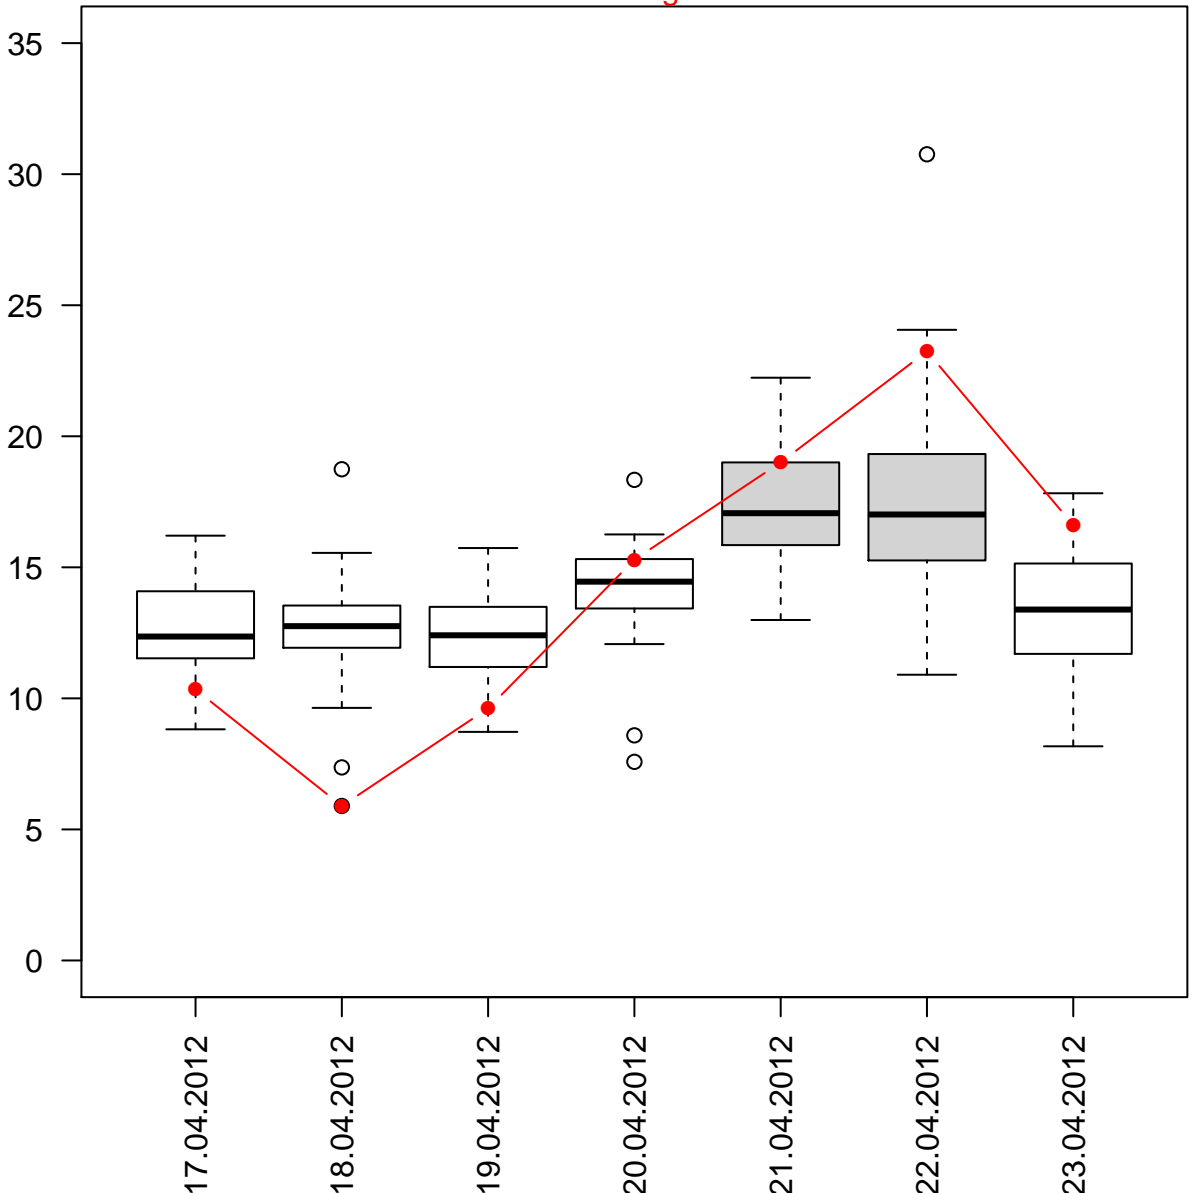

# BE loads % per weekday

Barcelona

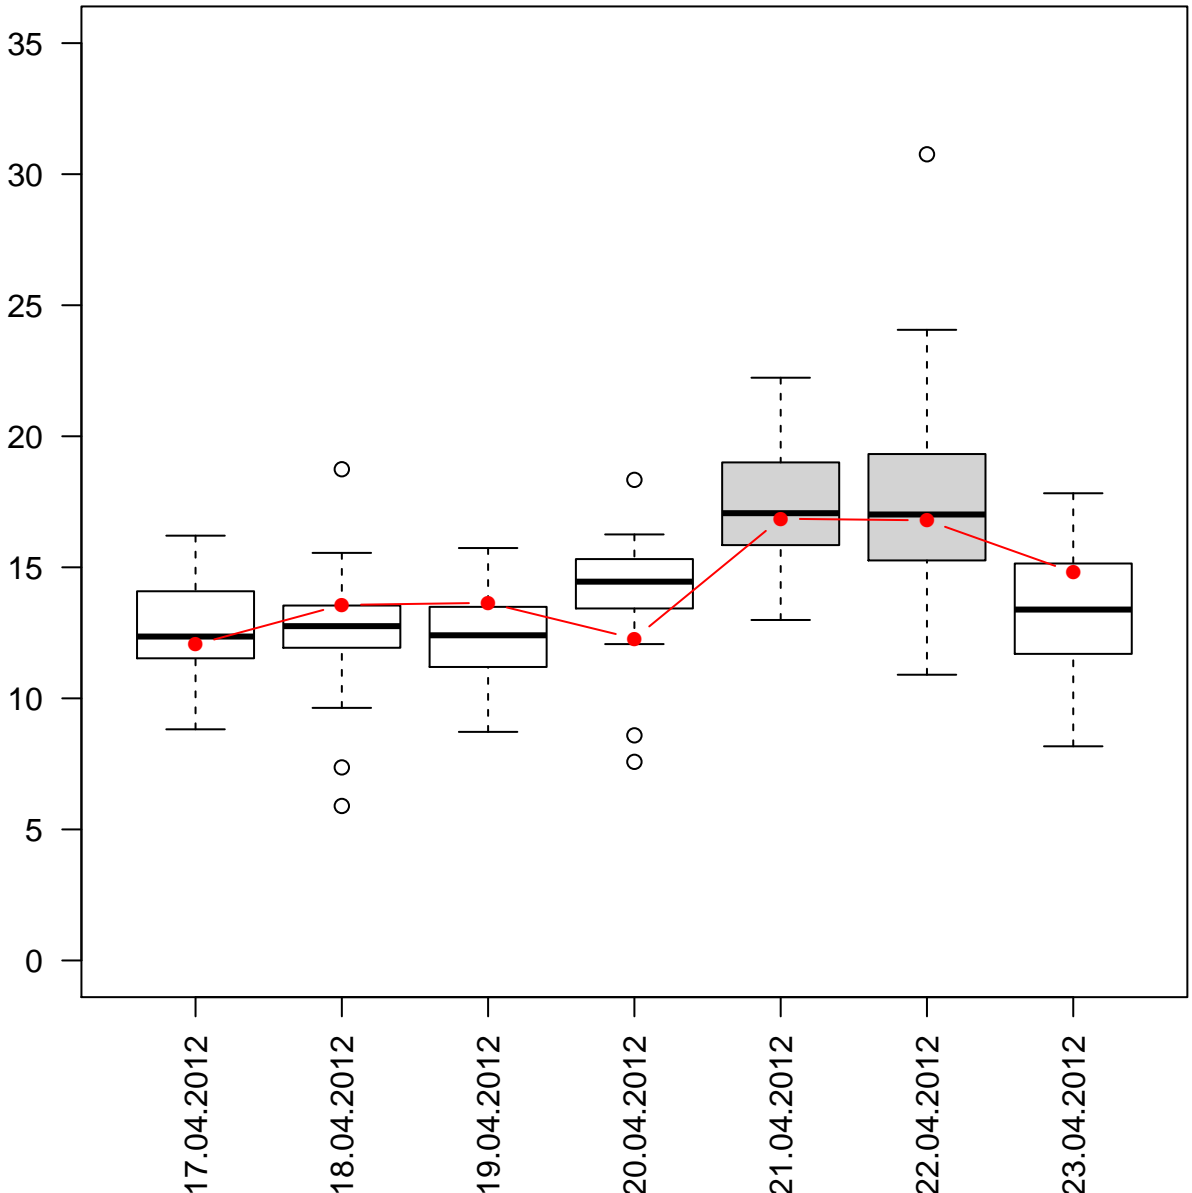

# BE loads % per weekday

Helsinki

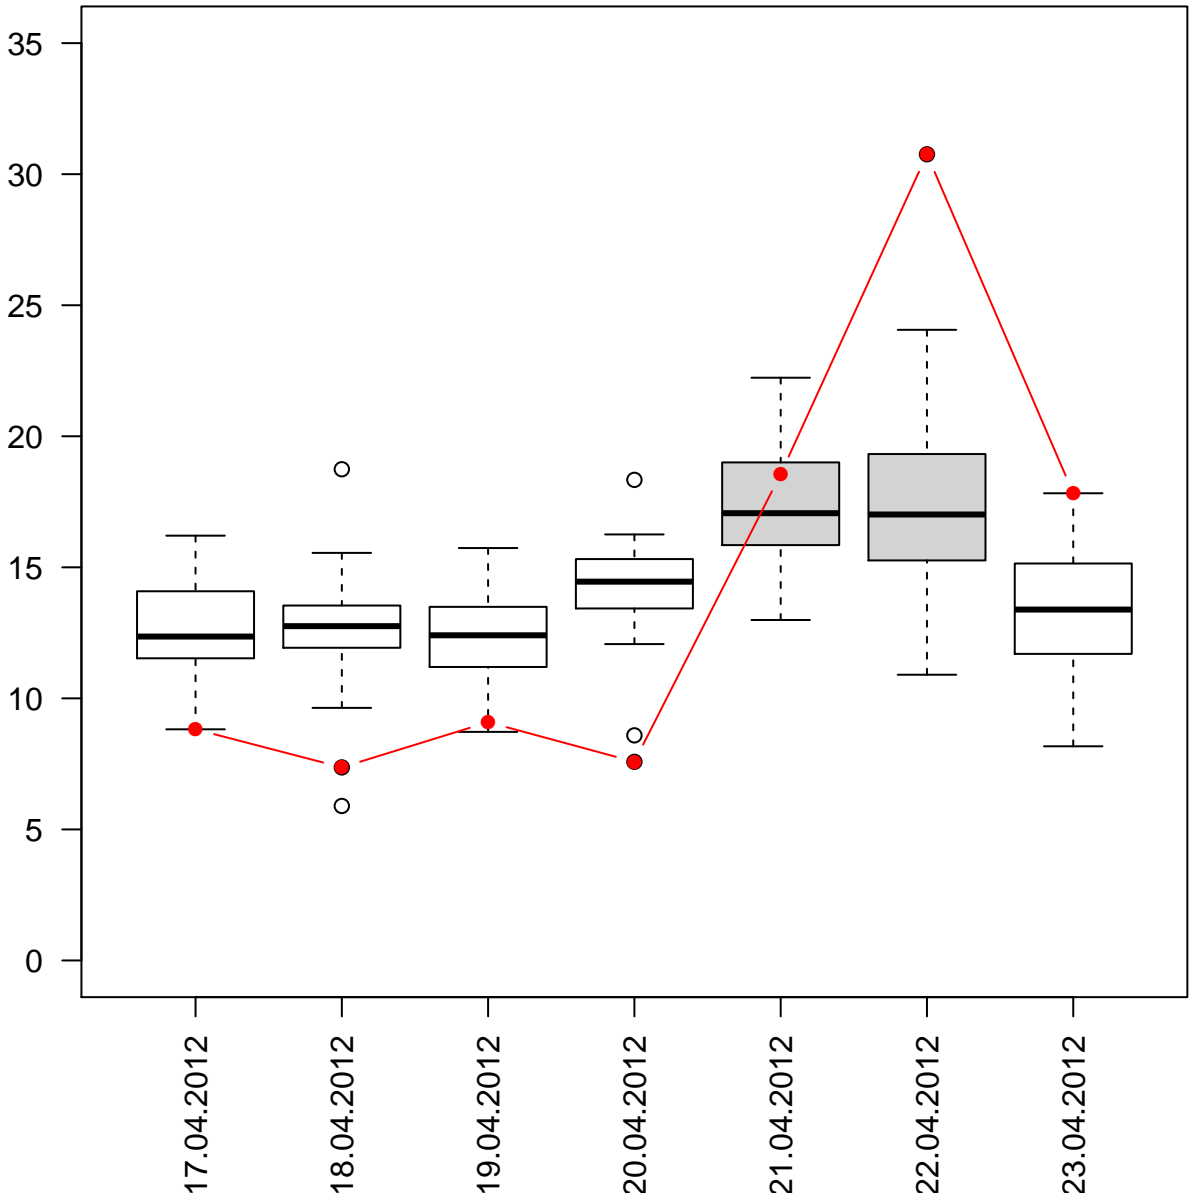

# BE loads % per weekday

Turku

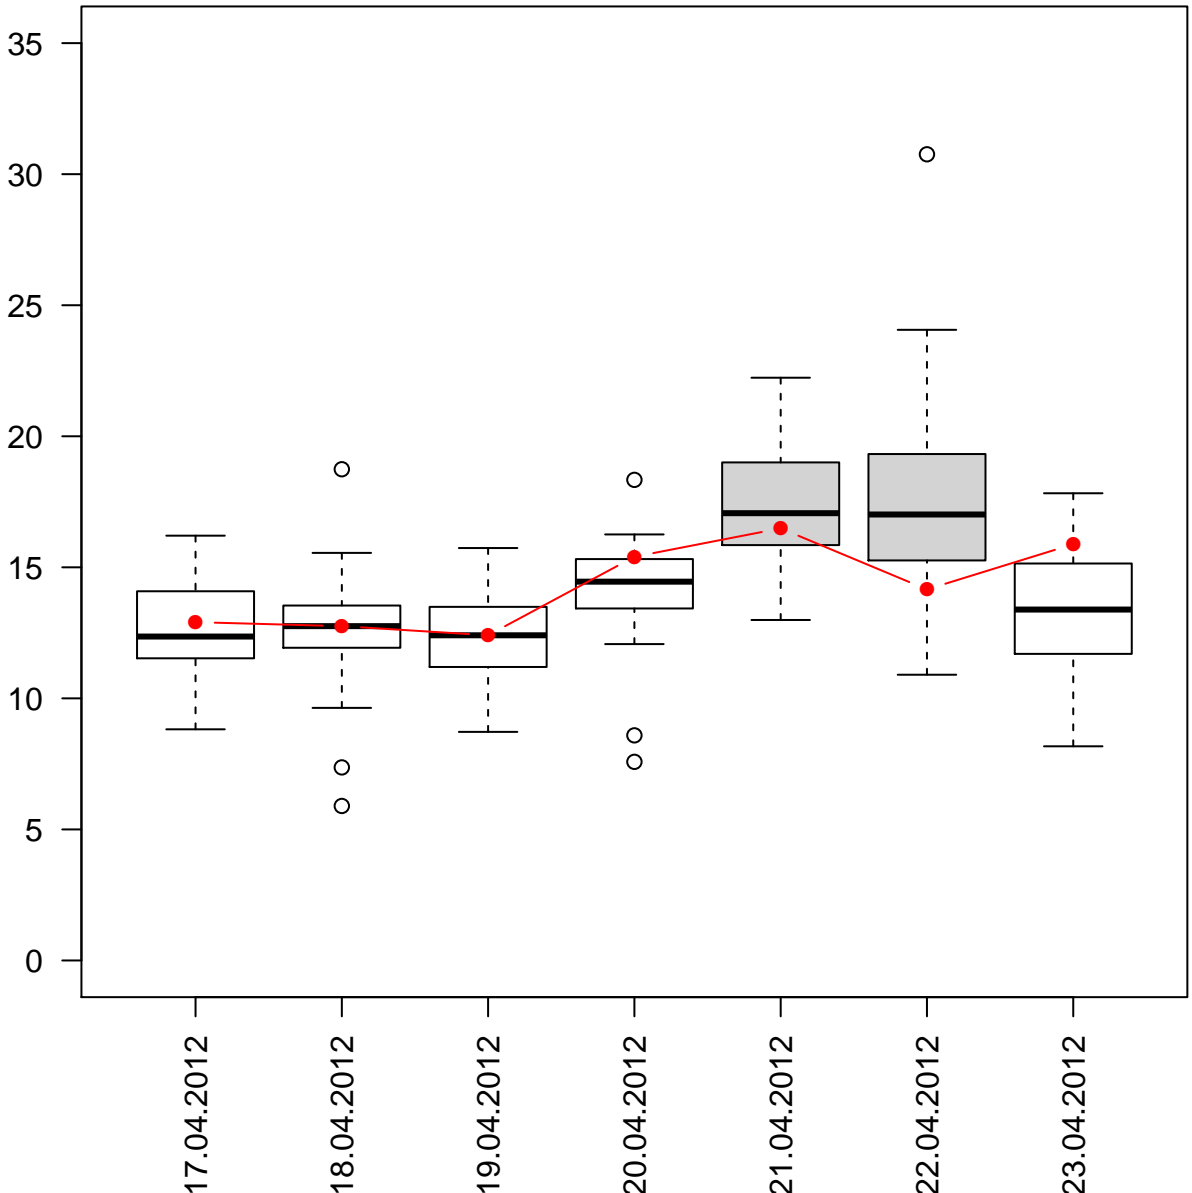



# BE loads % per weekday

Paris

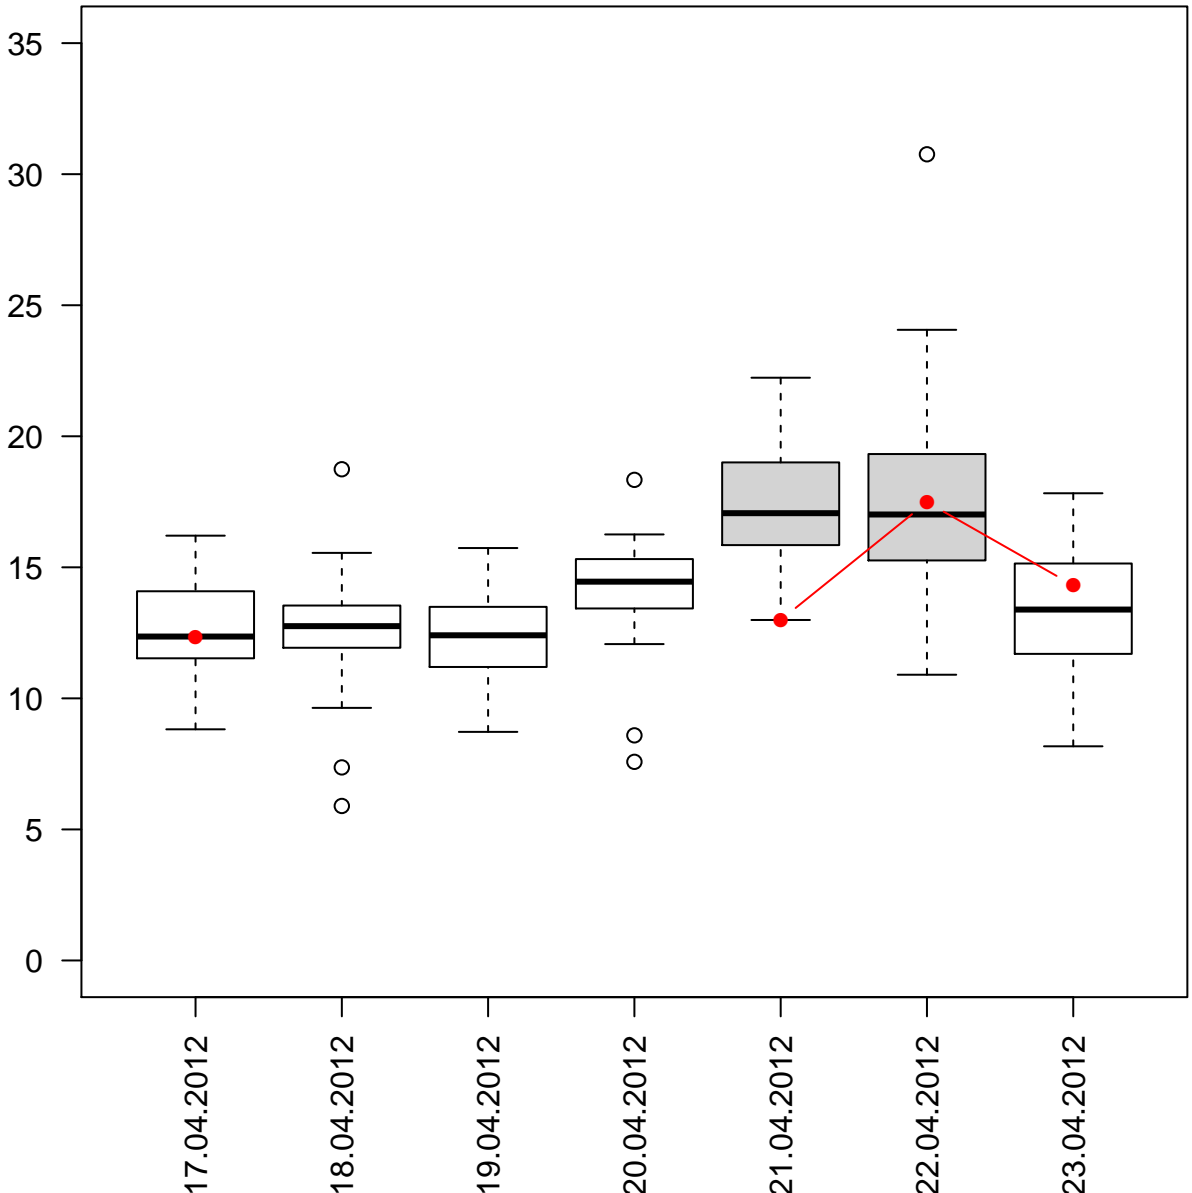

# BE loads % per weekday

Zagreb

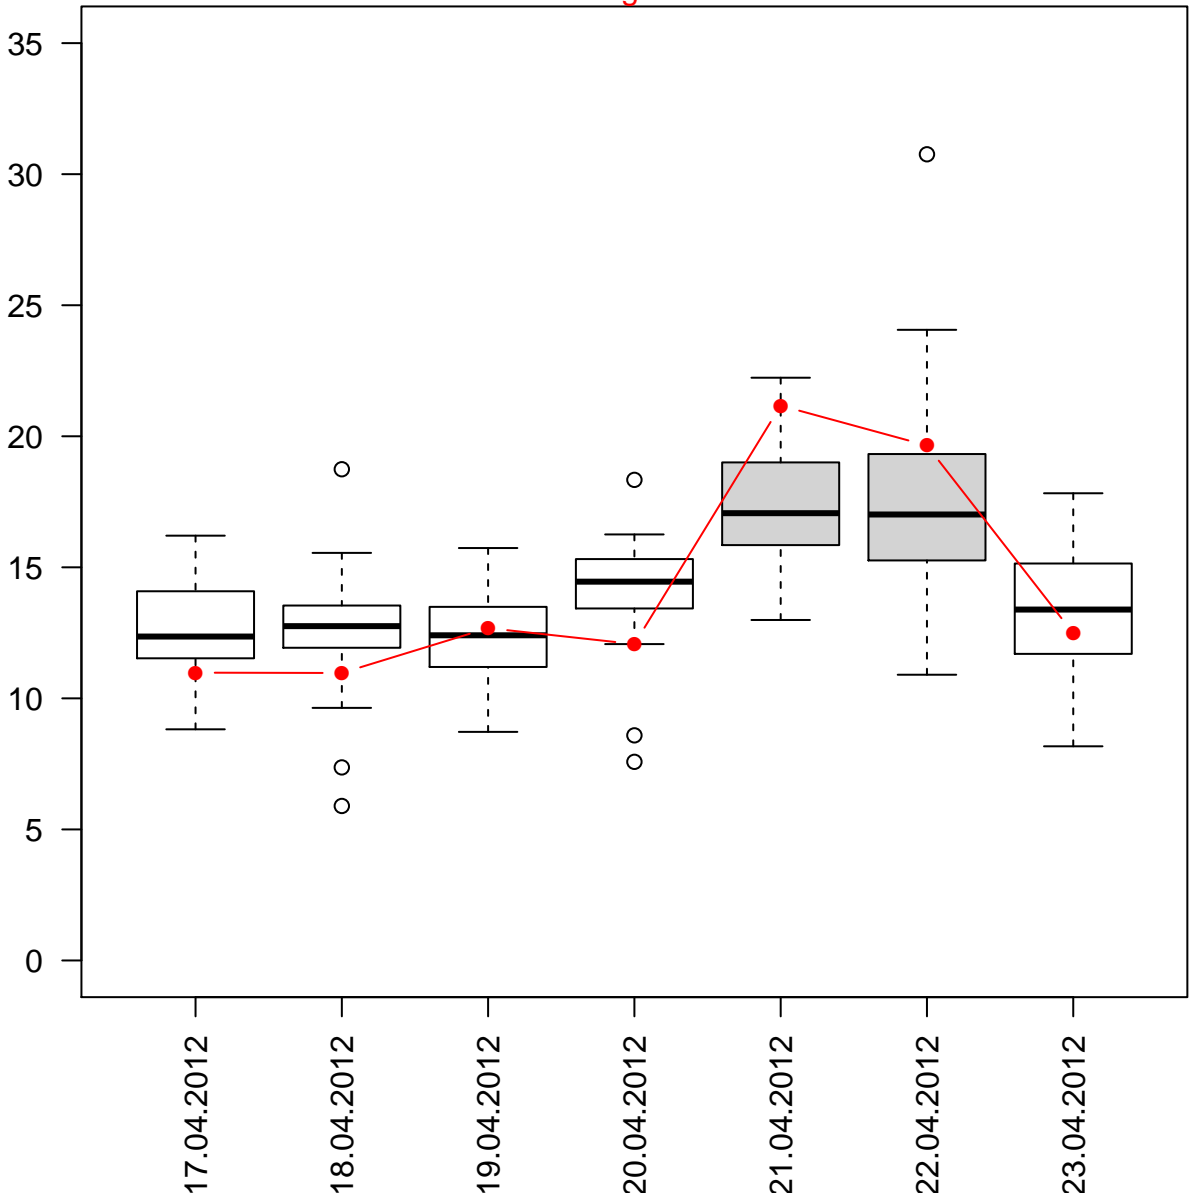

# BE loads % per weekday

Milan

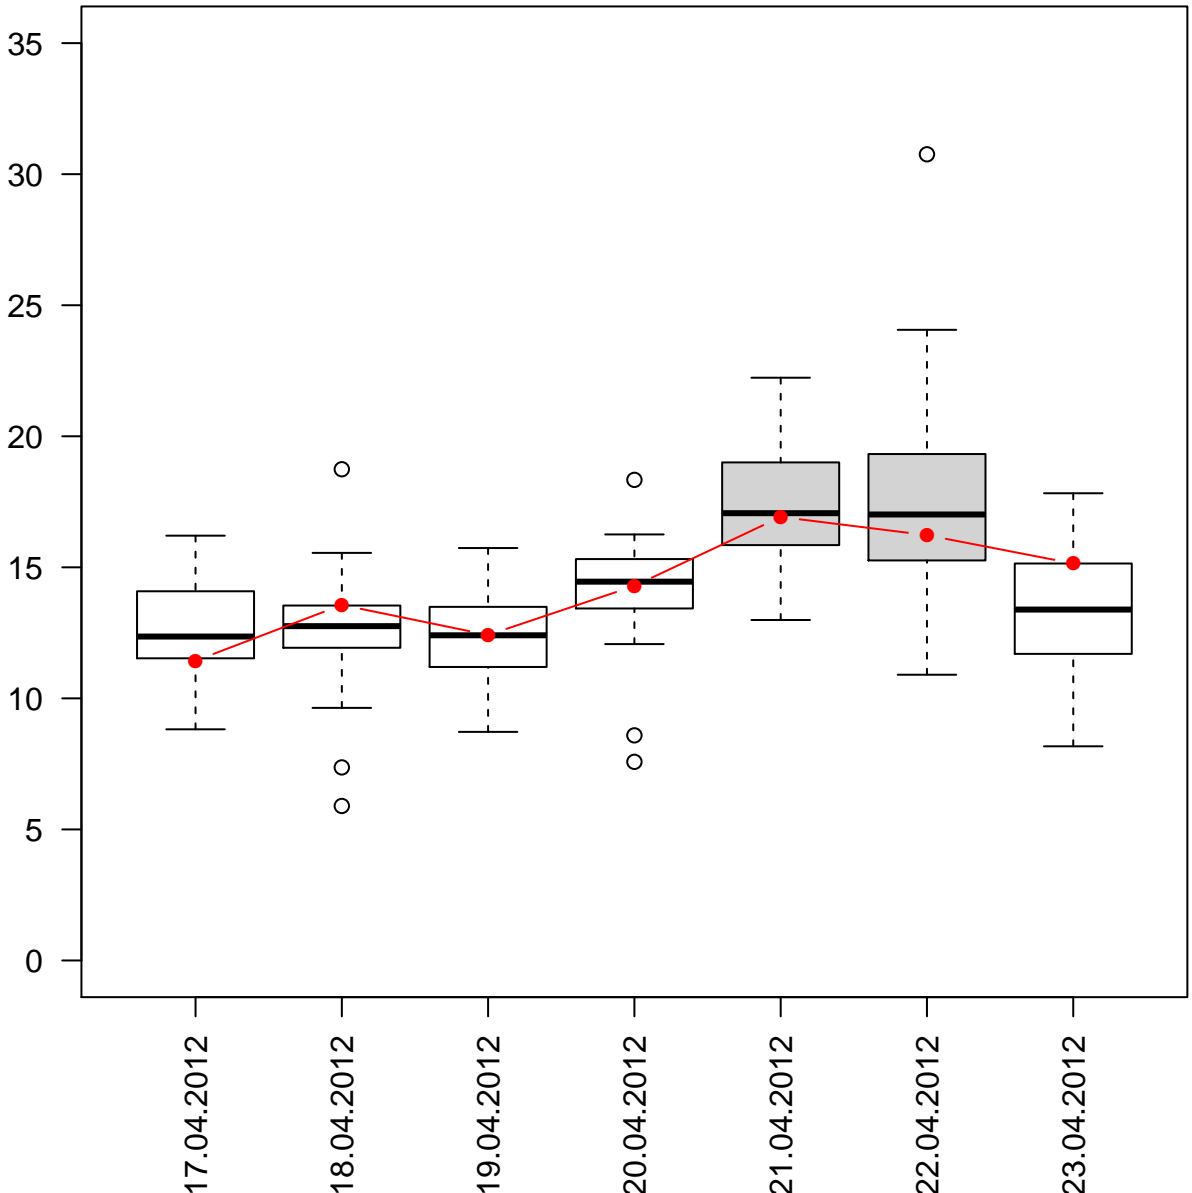

# BE loads % per weekday

Amsterdam

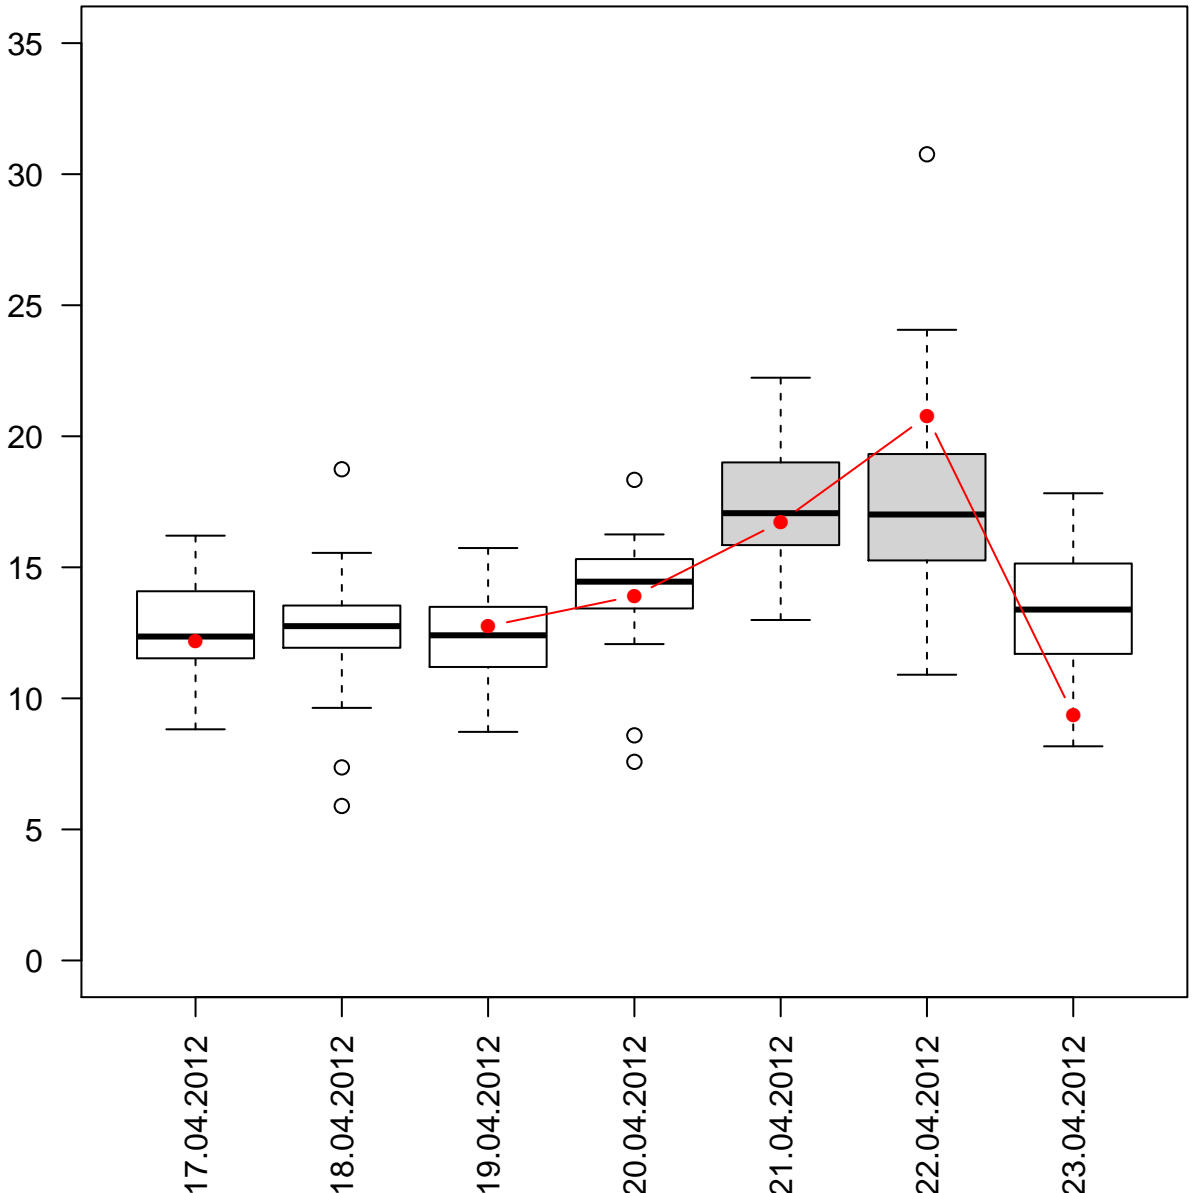

# BE loads % per weekday

Eindhoven

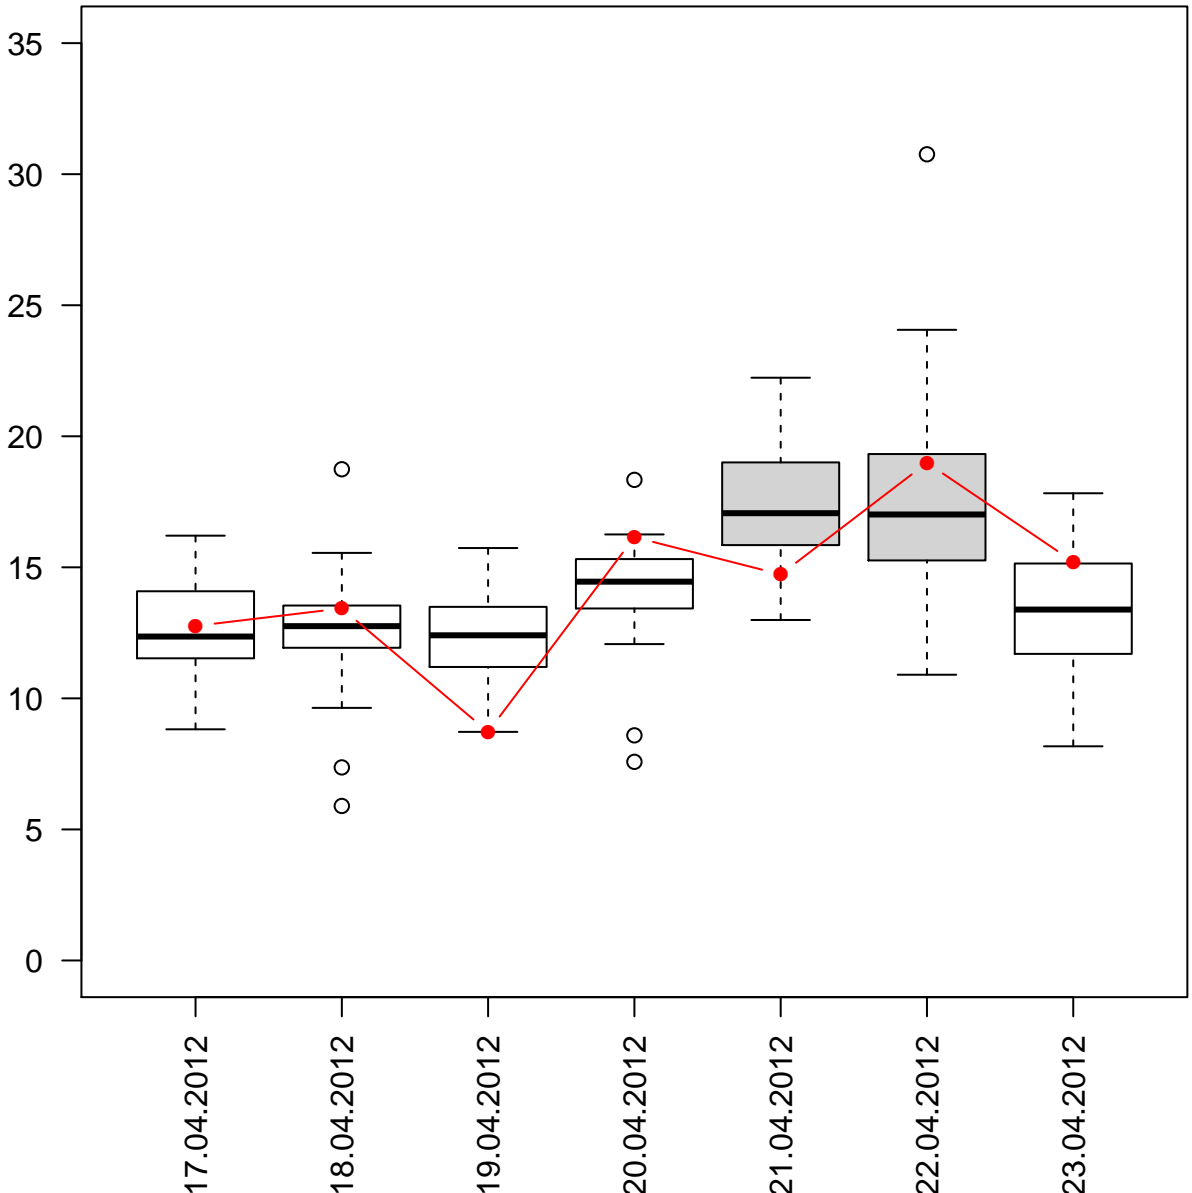

# BE loads % per weekday

Utrecht

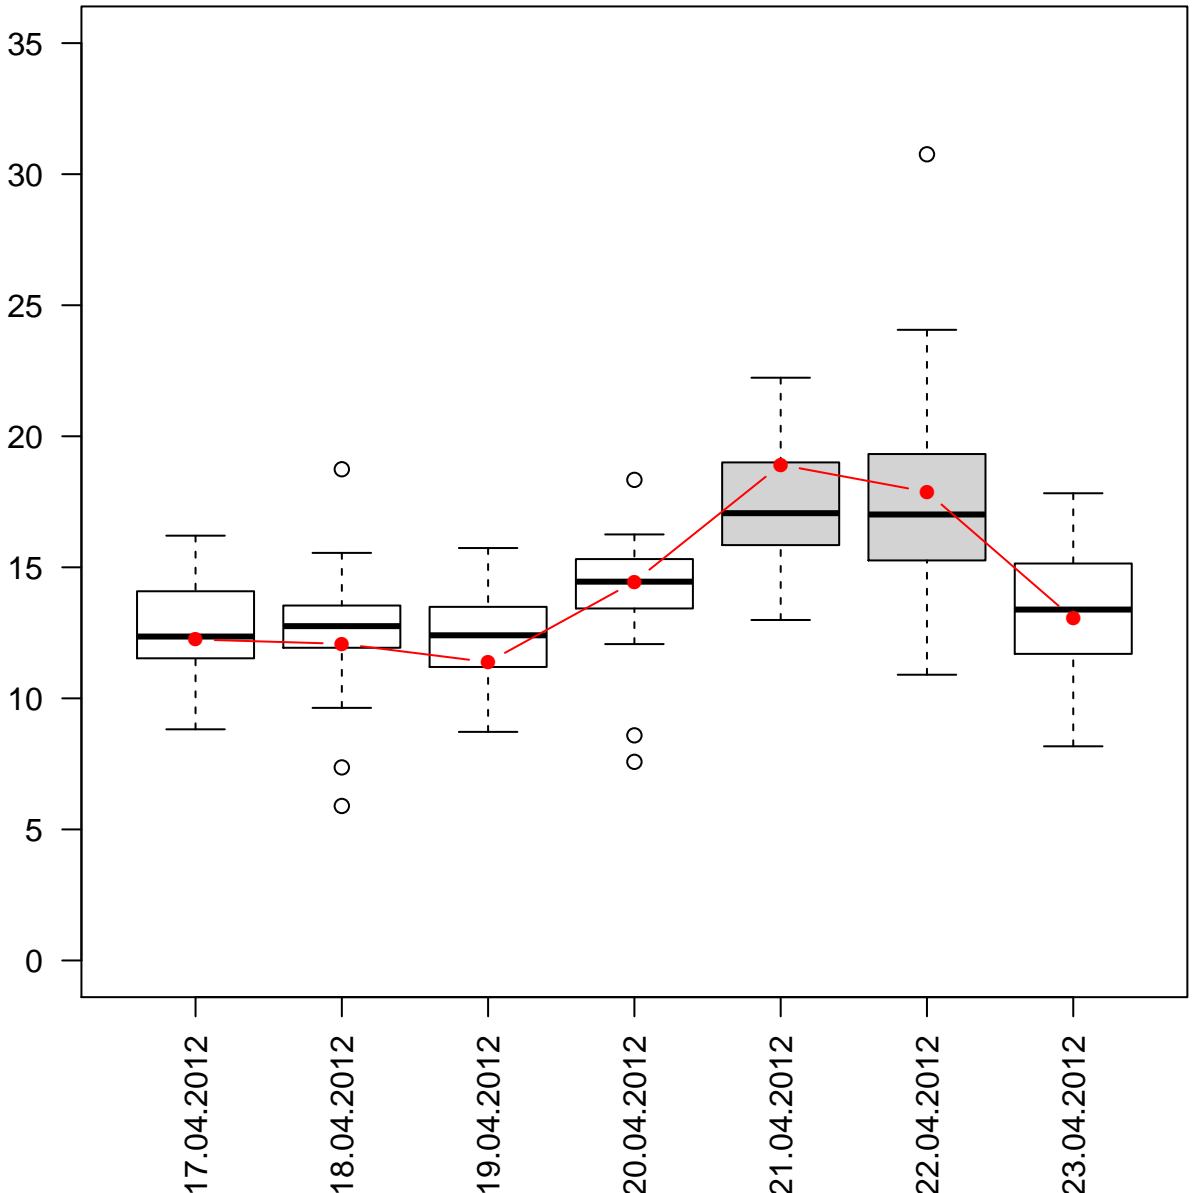

# BE loads % per weekday

Oslo

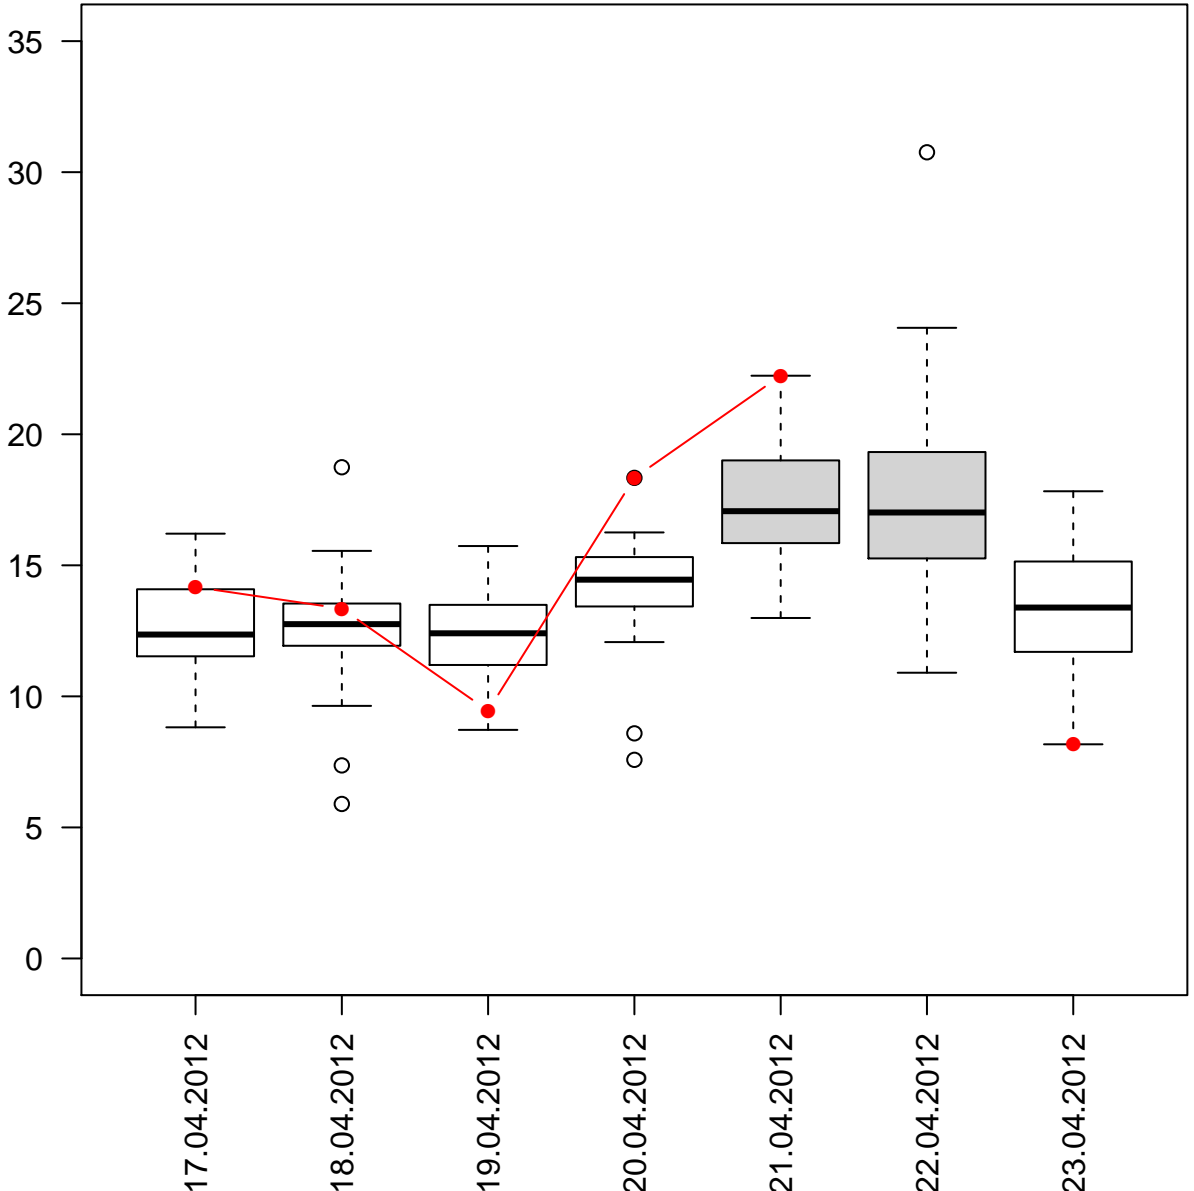

# BE loads % per weekday

Gothenburg

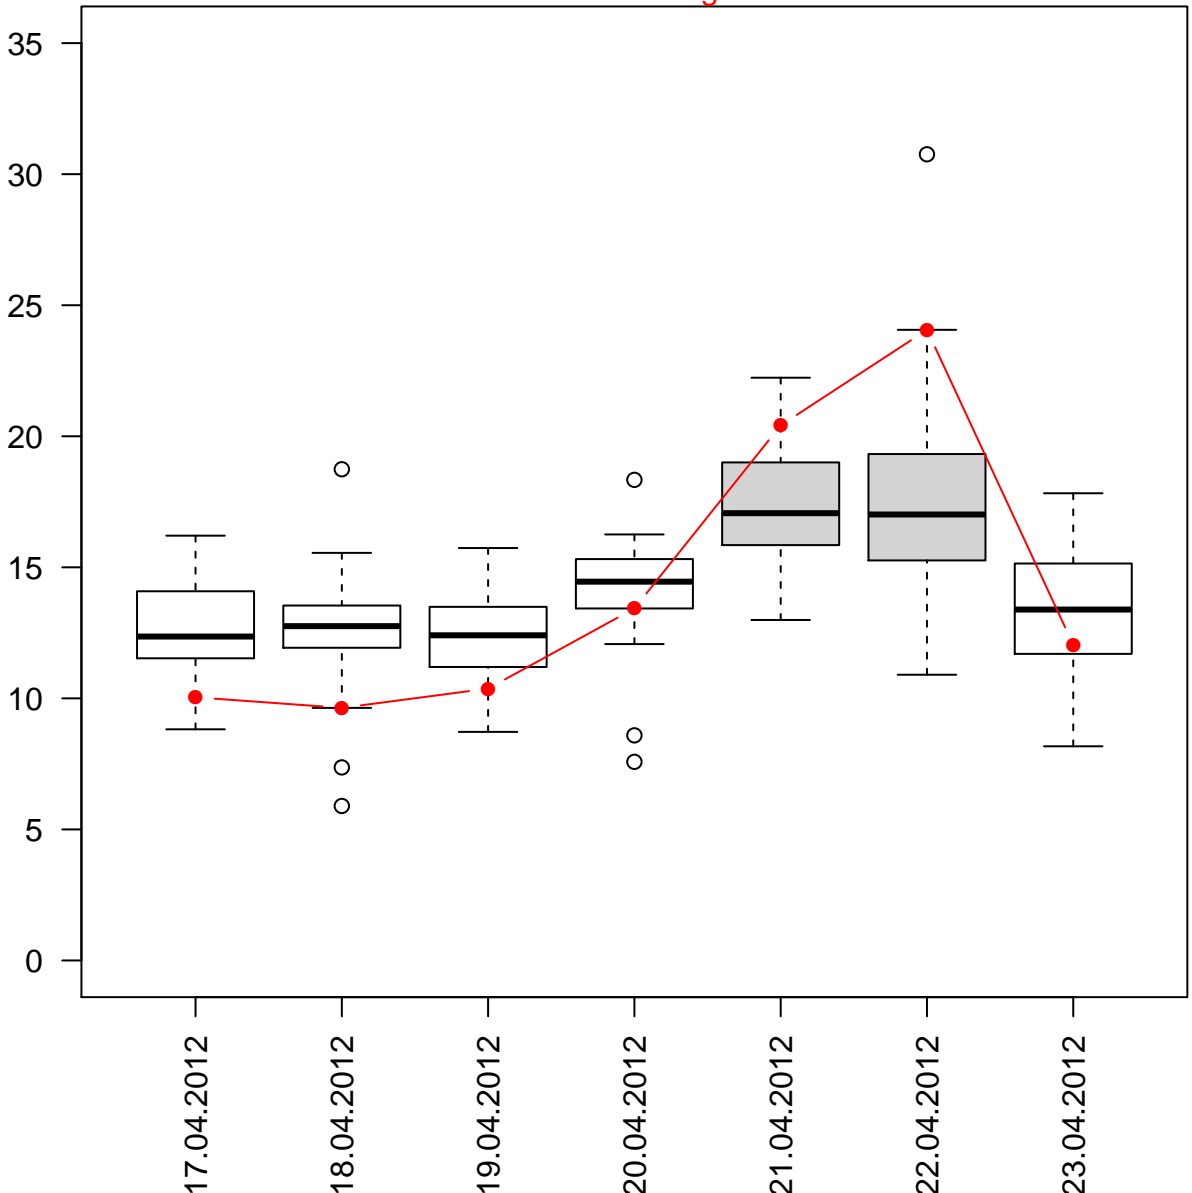



# BE loads % per weekday

Umeå

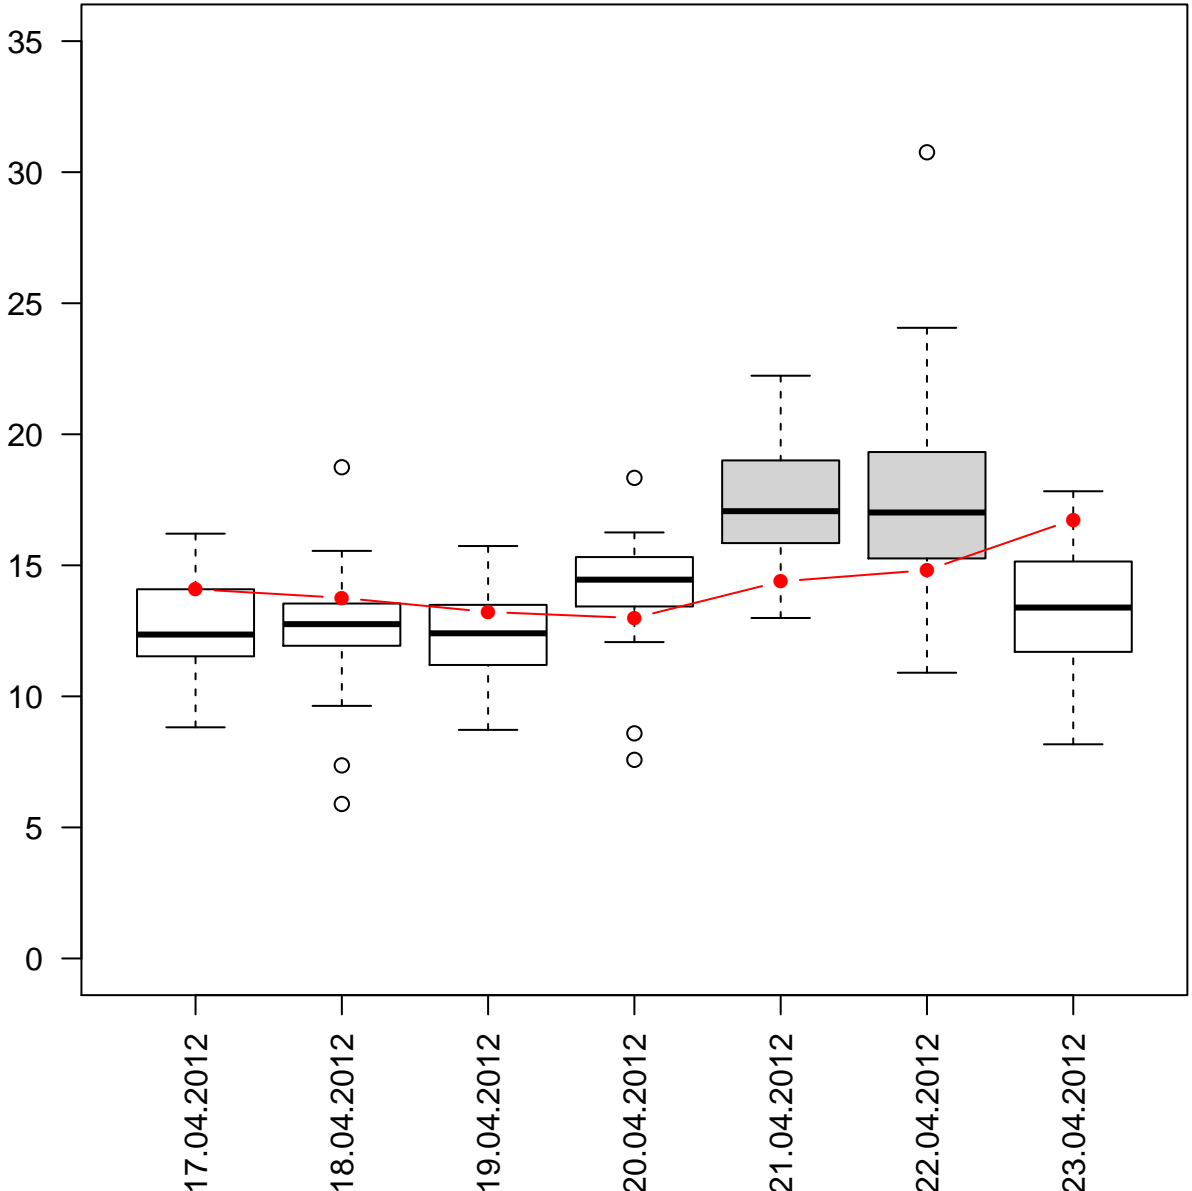

# AMP loads % per weekday

Antwerp Z.

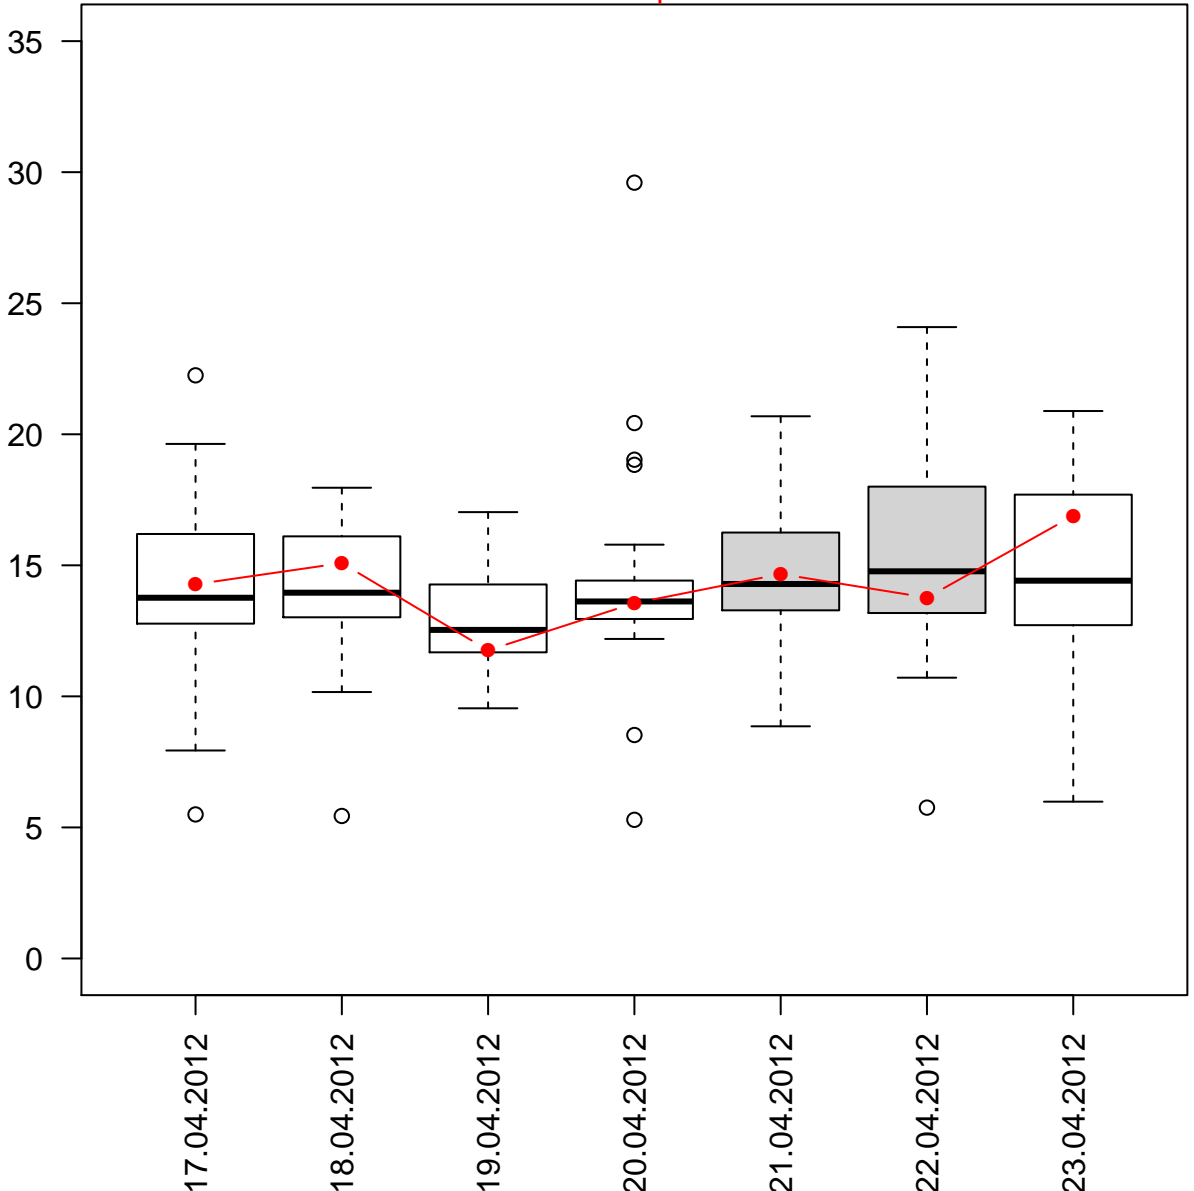

# AMP loads % per weekday

Antwerp D.

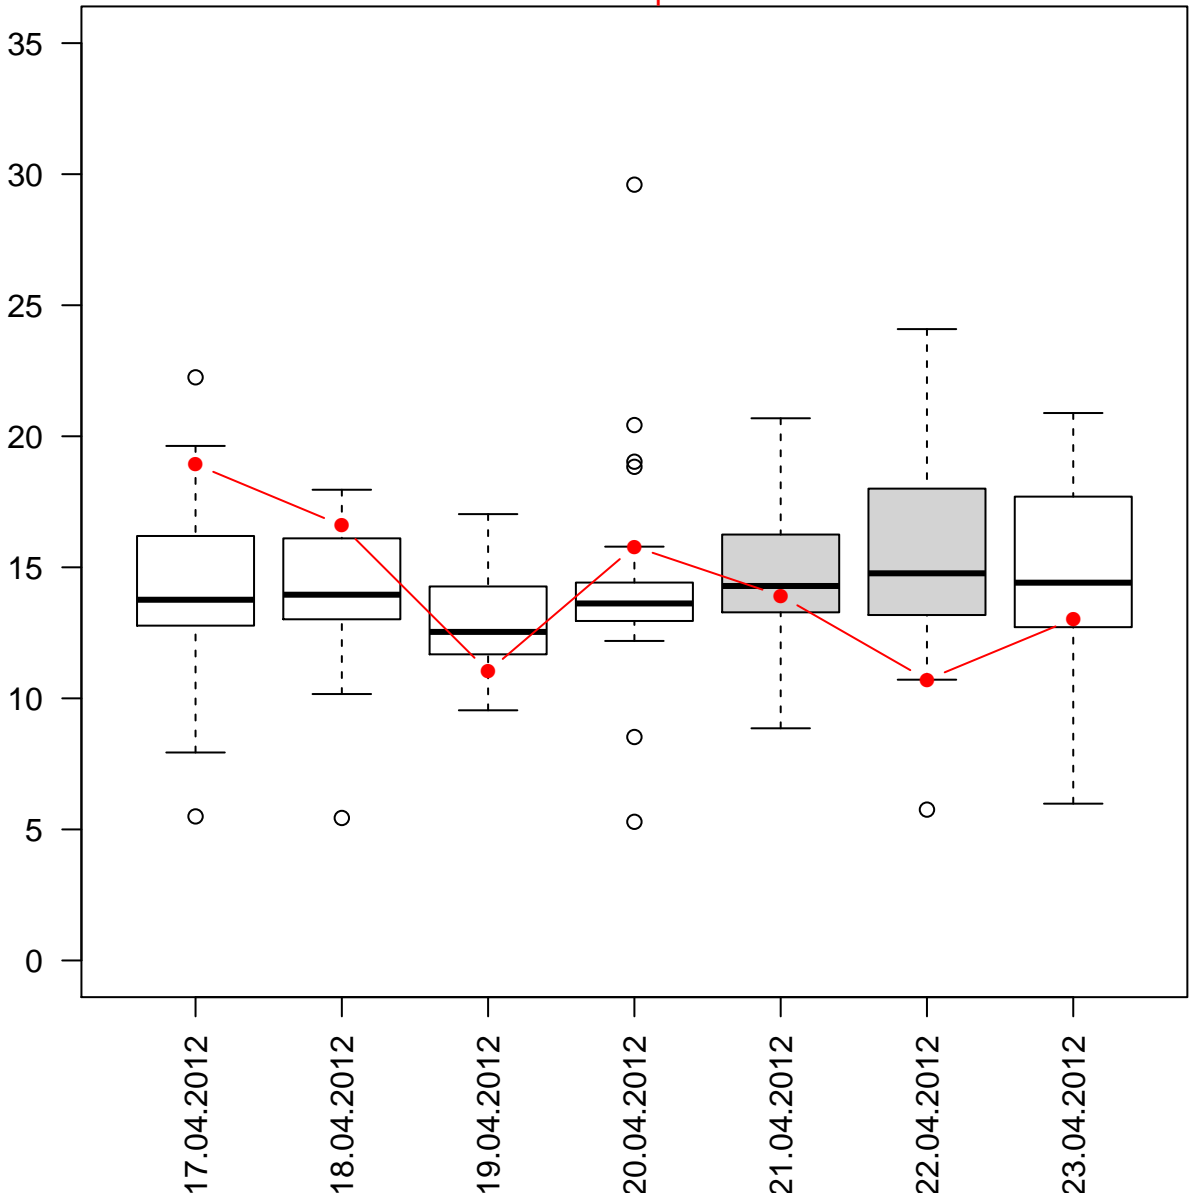

# AMP loads % per weekday

Brussels

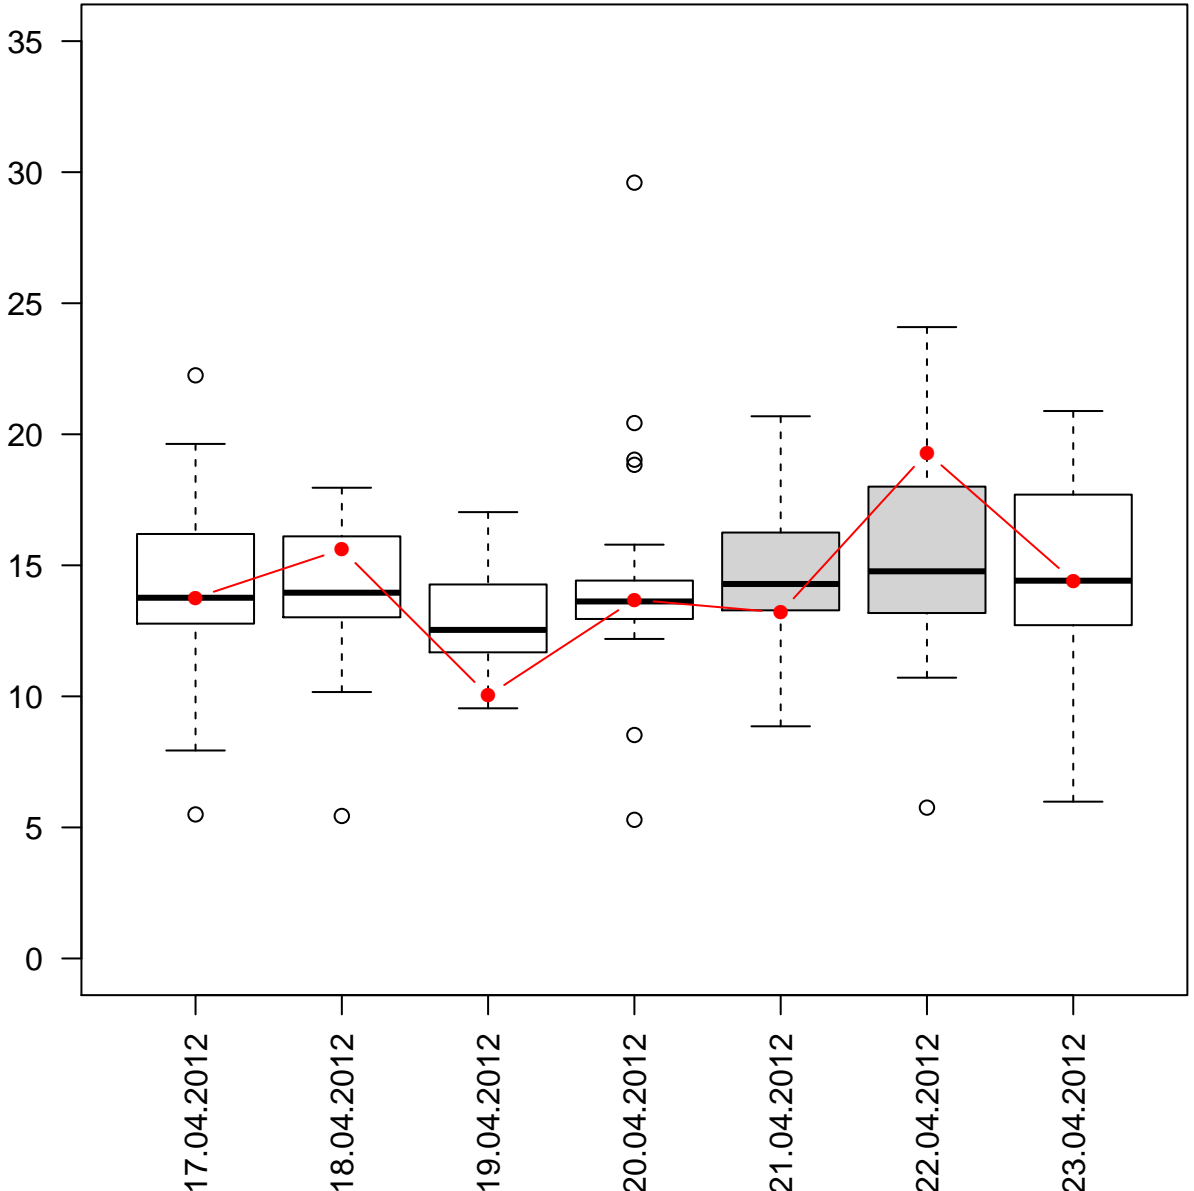

# AMP loads % per weekday

Basel

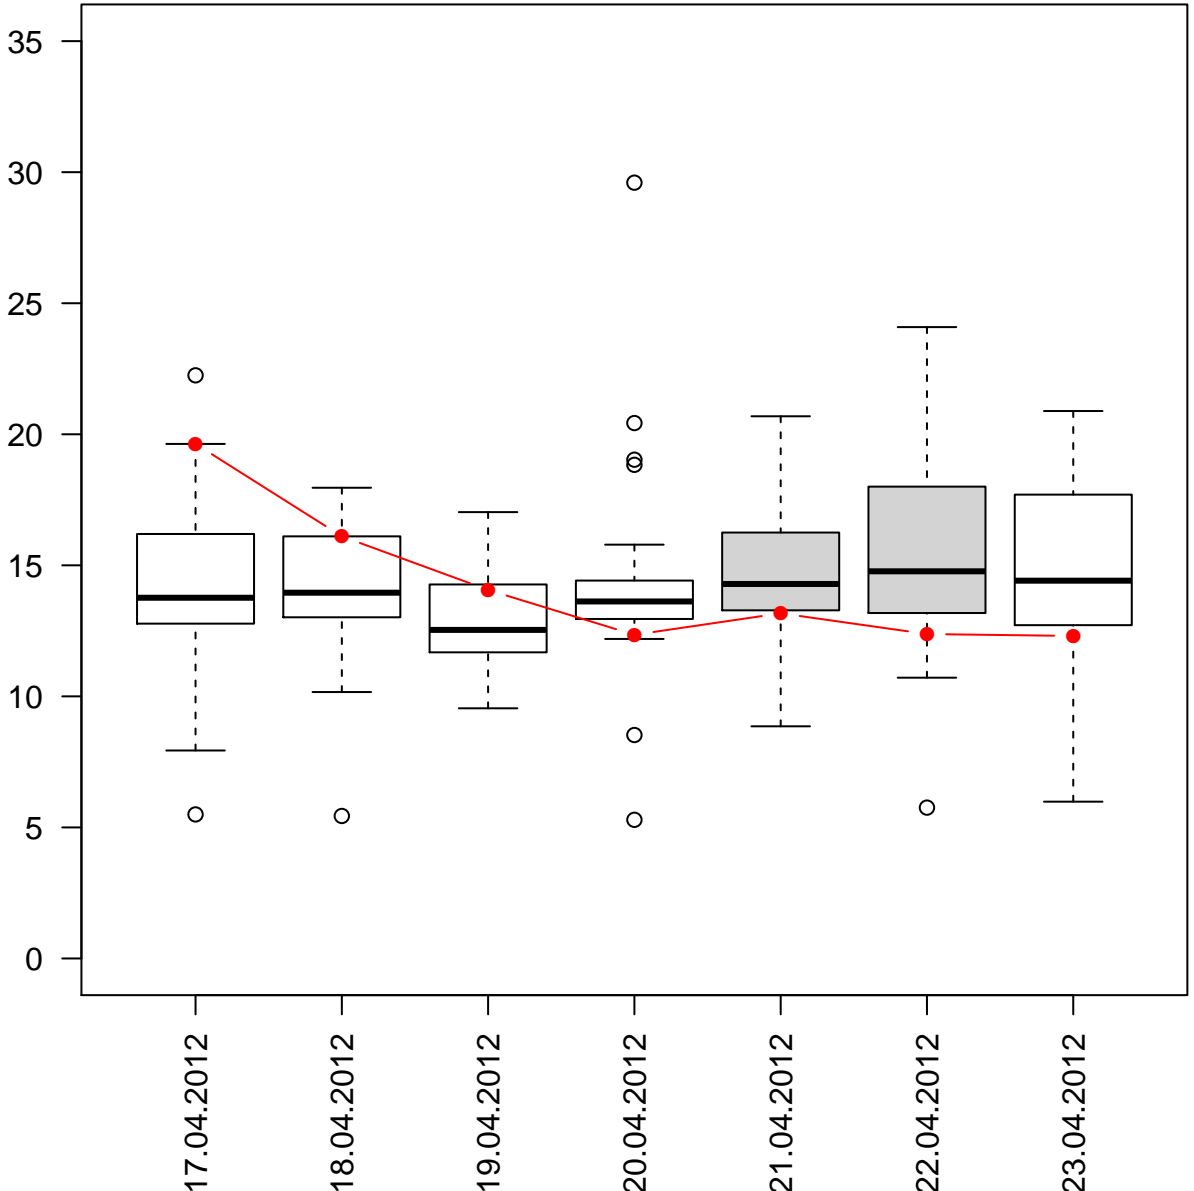

# AMP loads % per weekday

Berne

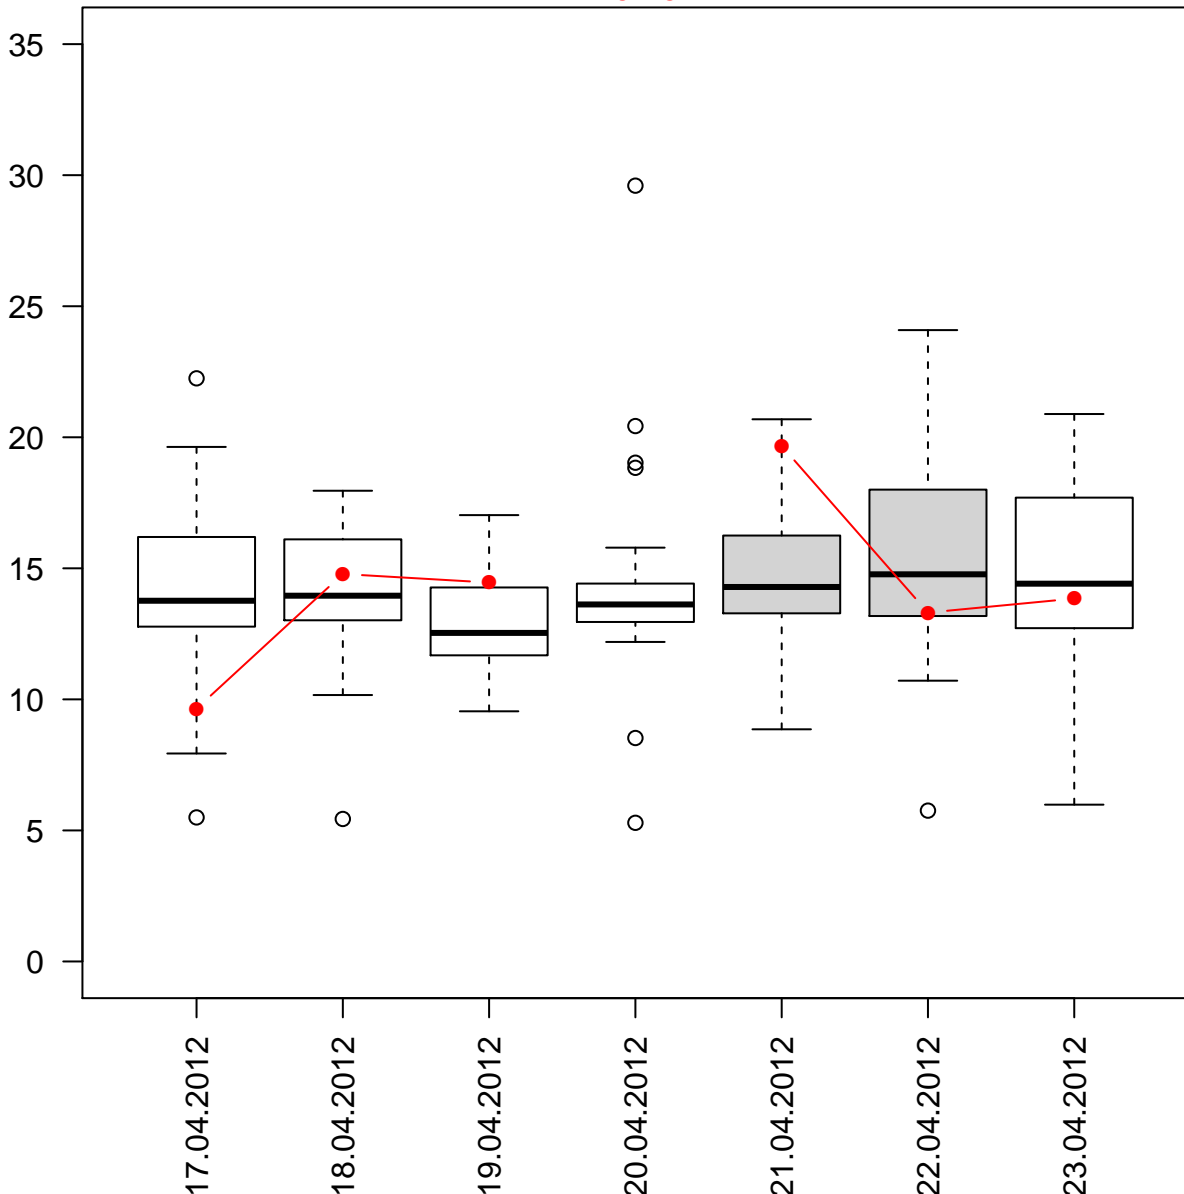

# AMP loads % per weekday

Geneva

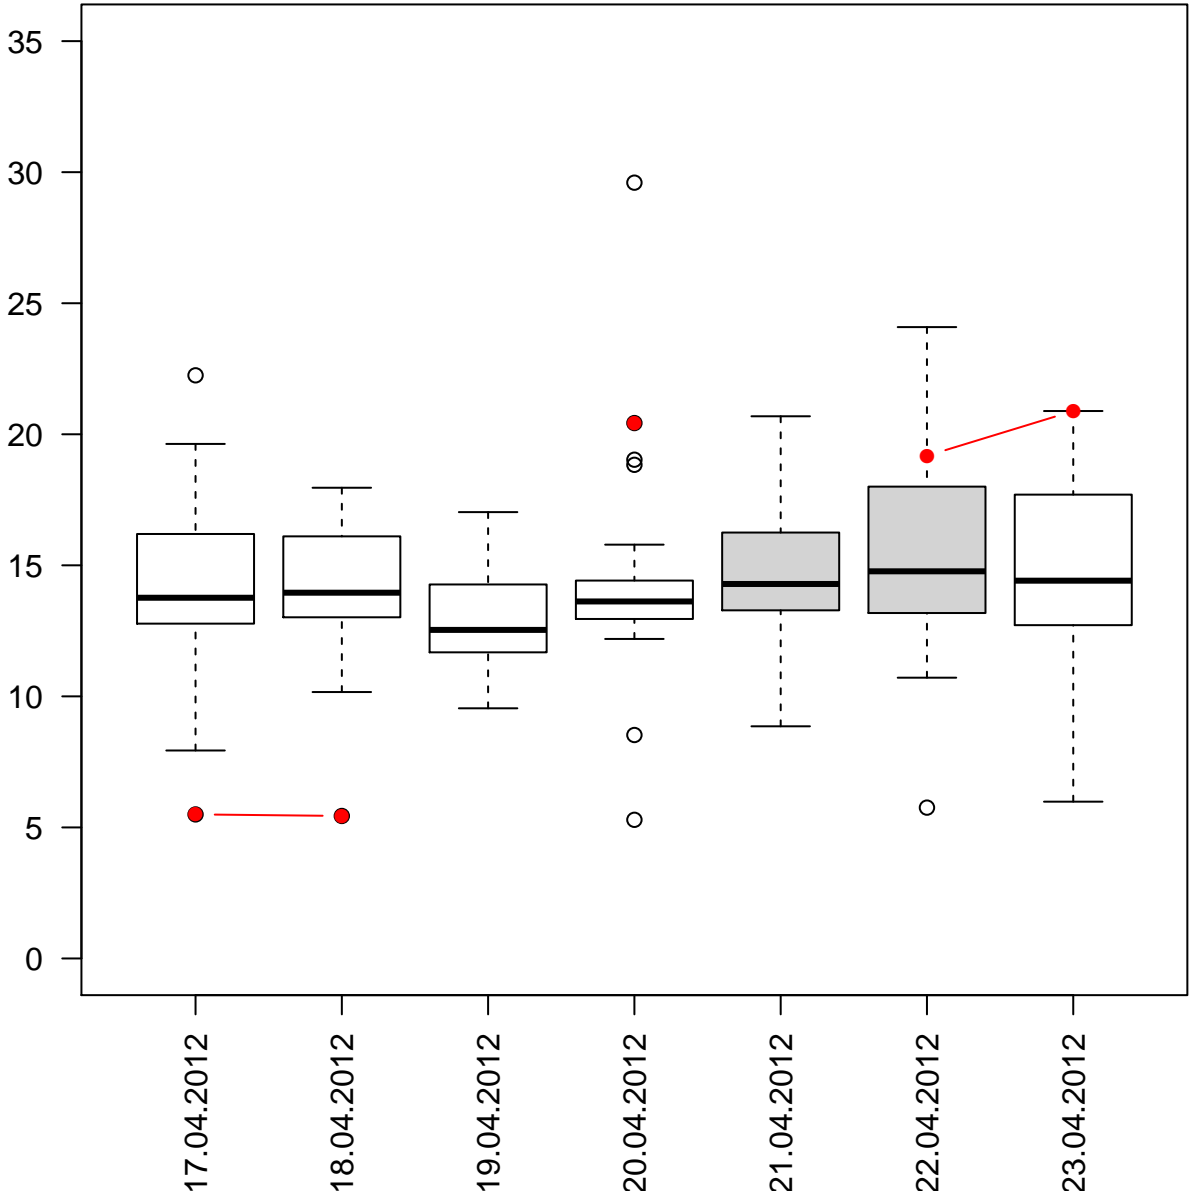

# AMP loads % per weekday

St.Gallen A.

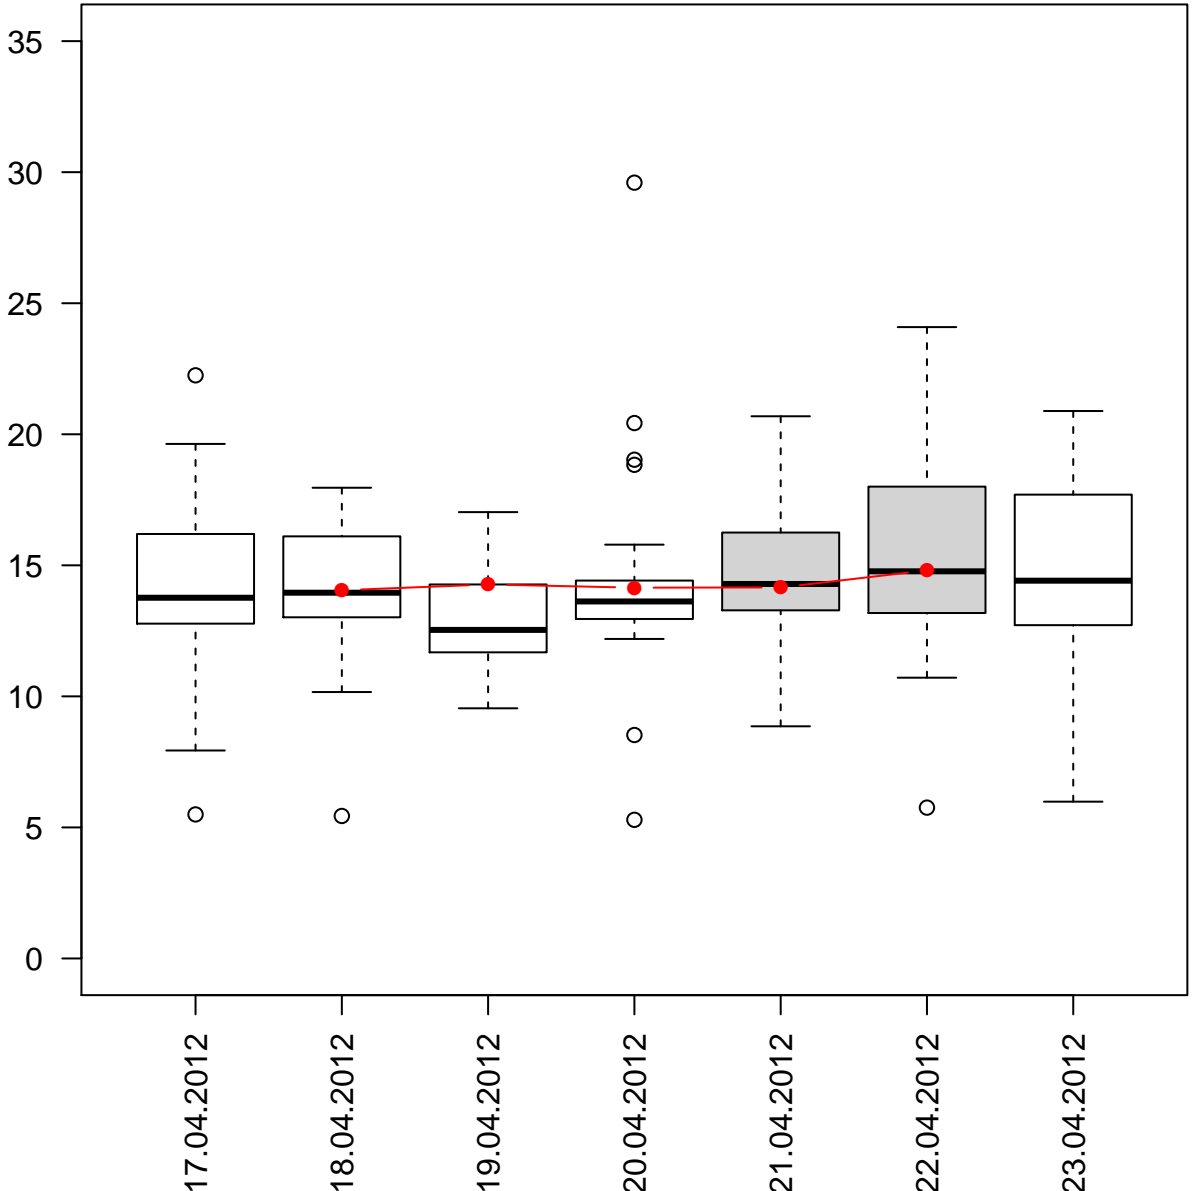



# AMP loads % per weekday

St.Gallen H.

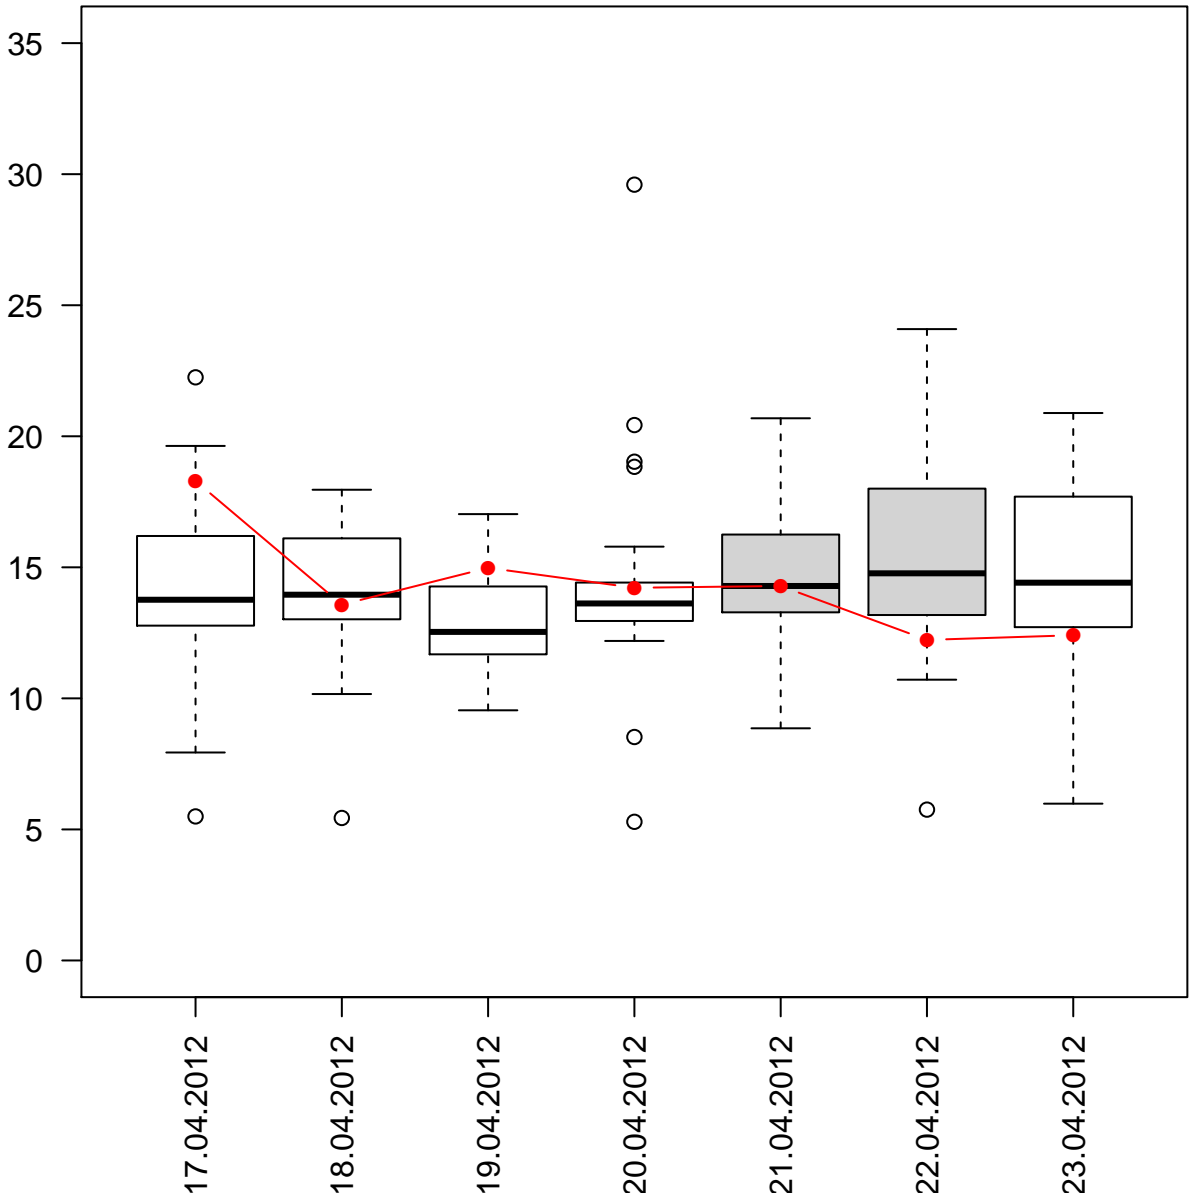

# AMP loads % per weekday

Zurich

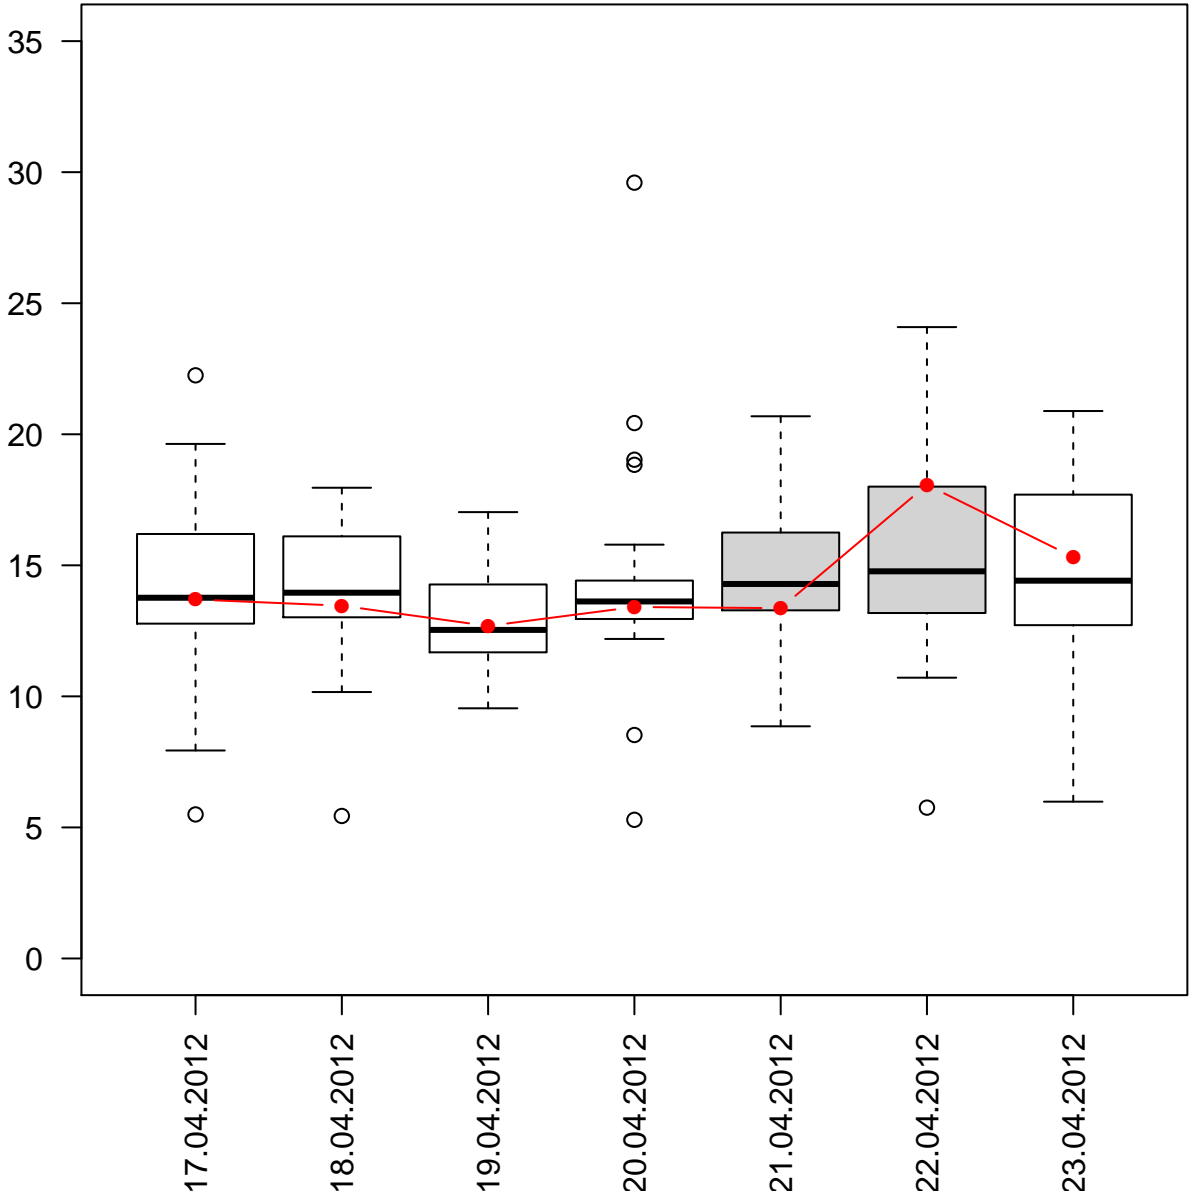

# AMP loads % per weekday

Budweis

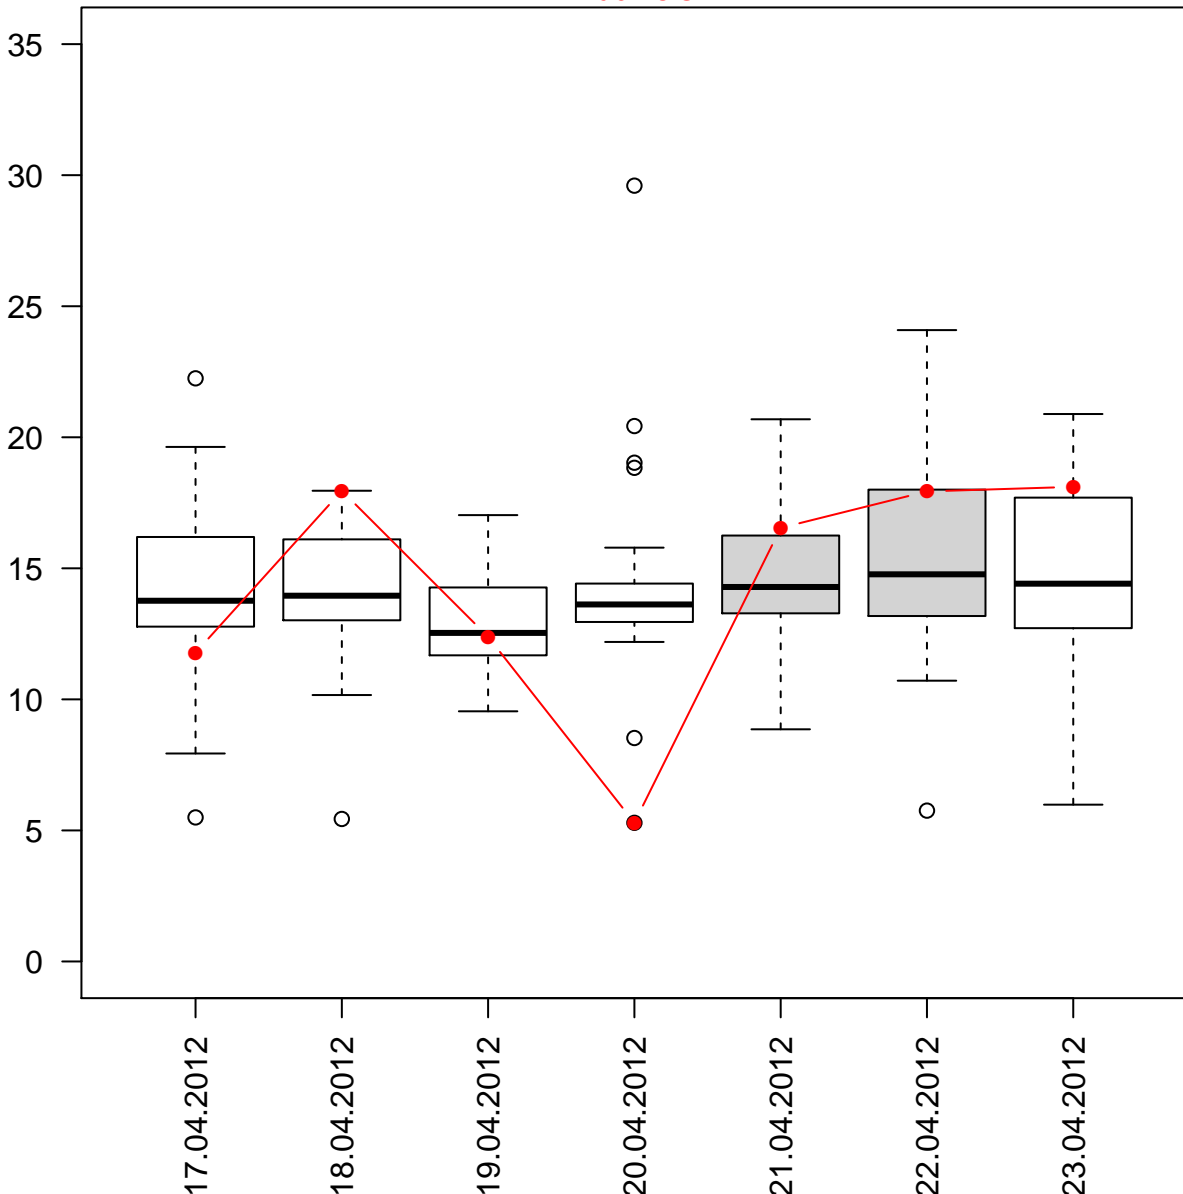

# AMP loads % per weekday

Prague

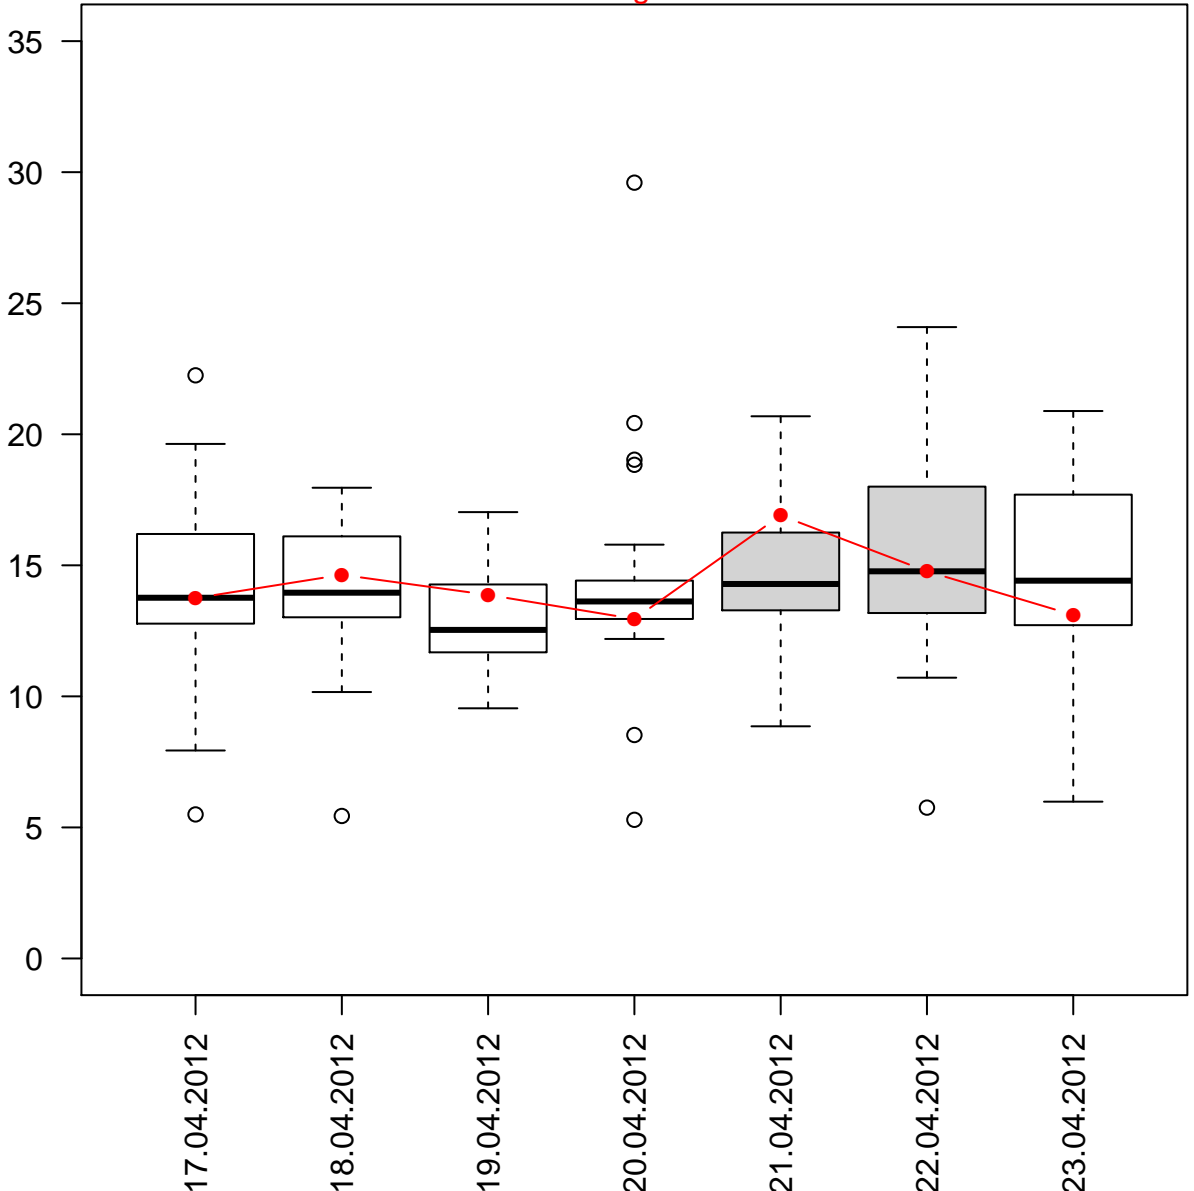

# AMP loads % per weekday

Santiago

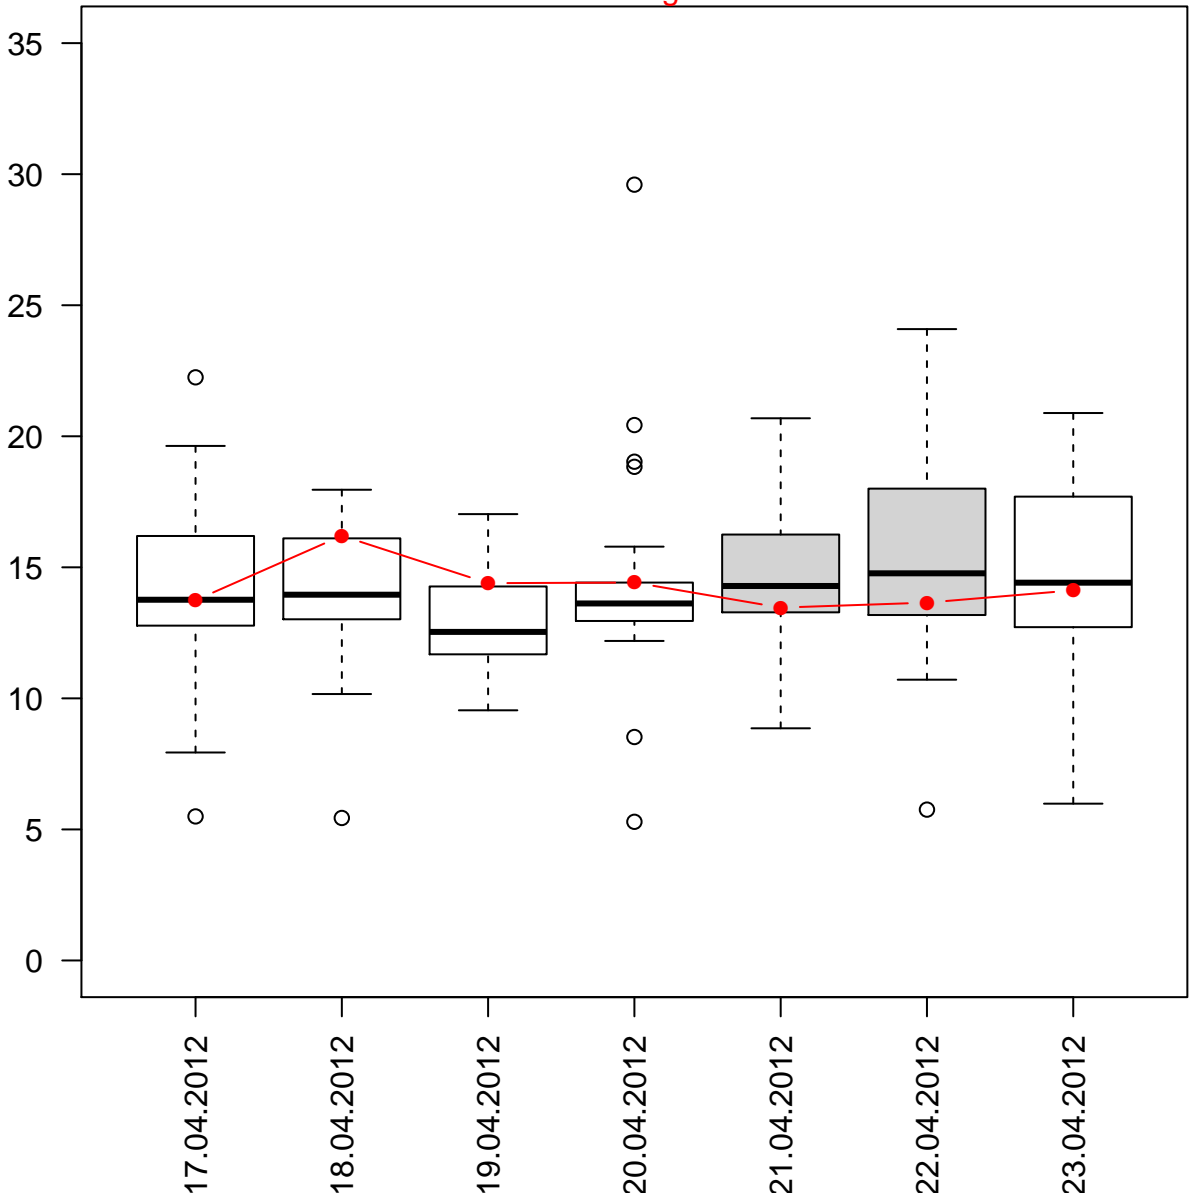

# AMP loads % per weekday

Barcelona

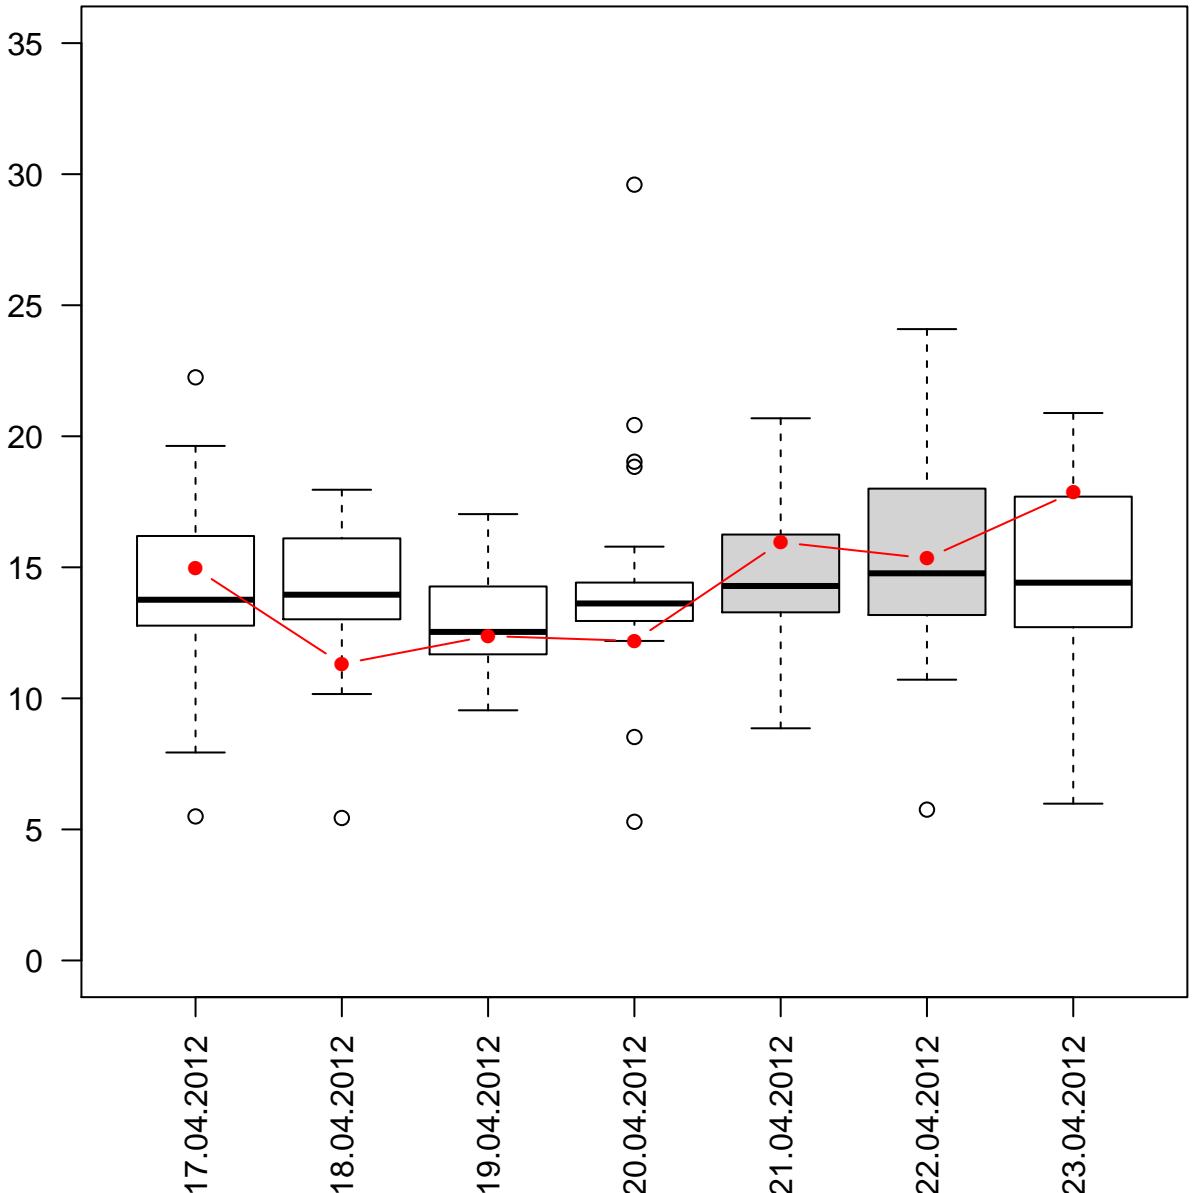

# AMP loads % per weekday

Helsinki

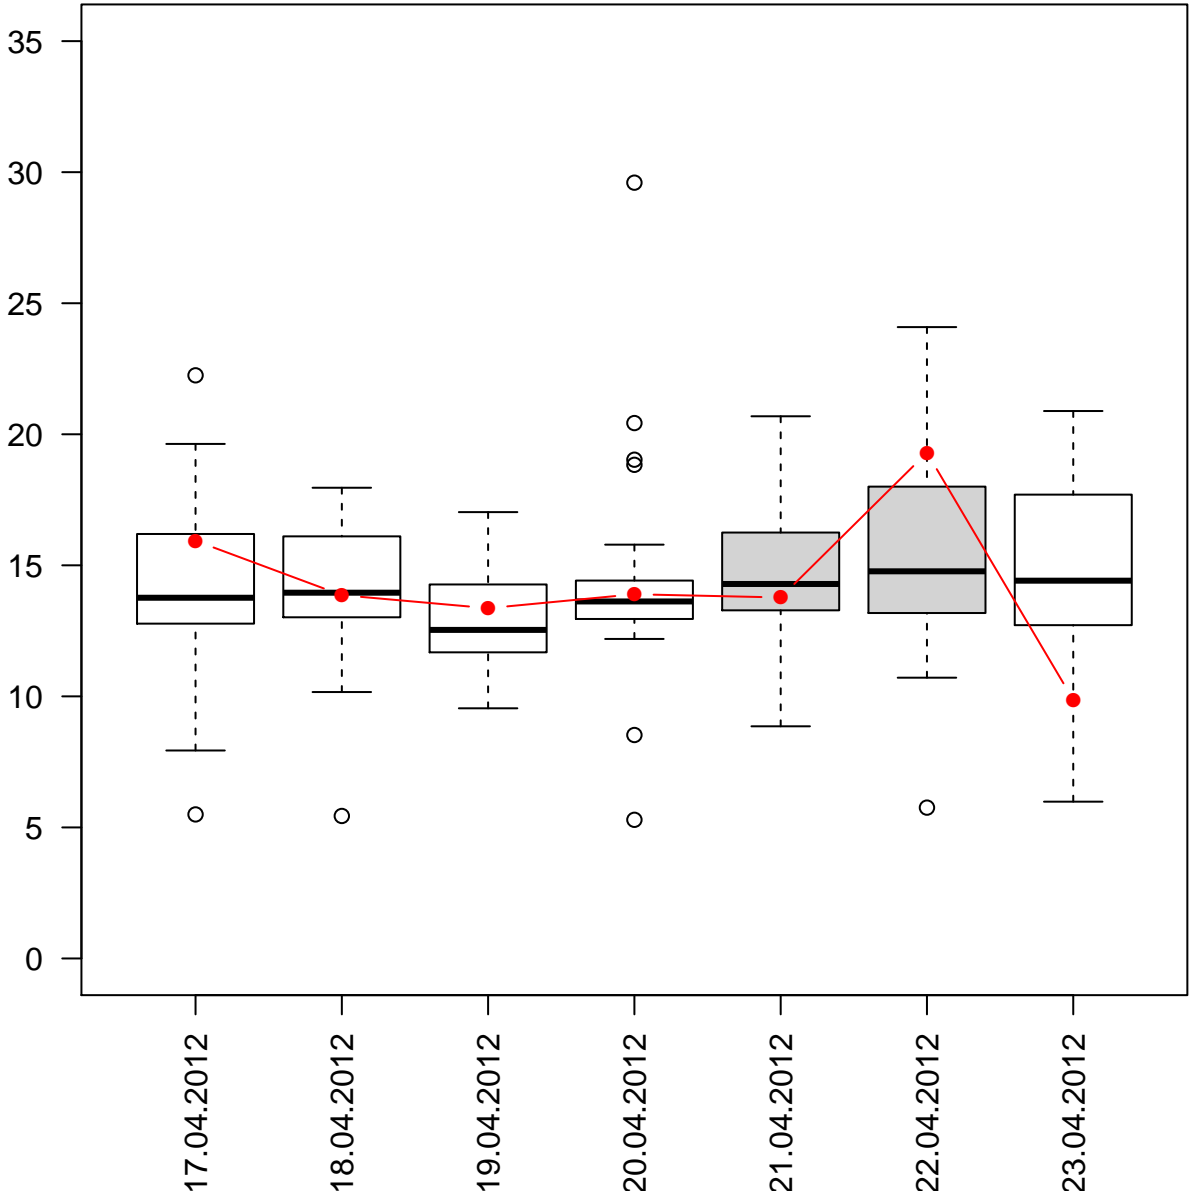

# AMP loads % per weekday

Turku

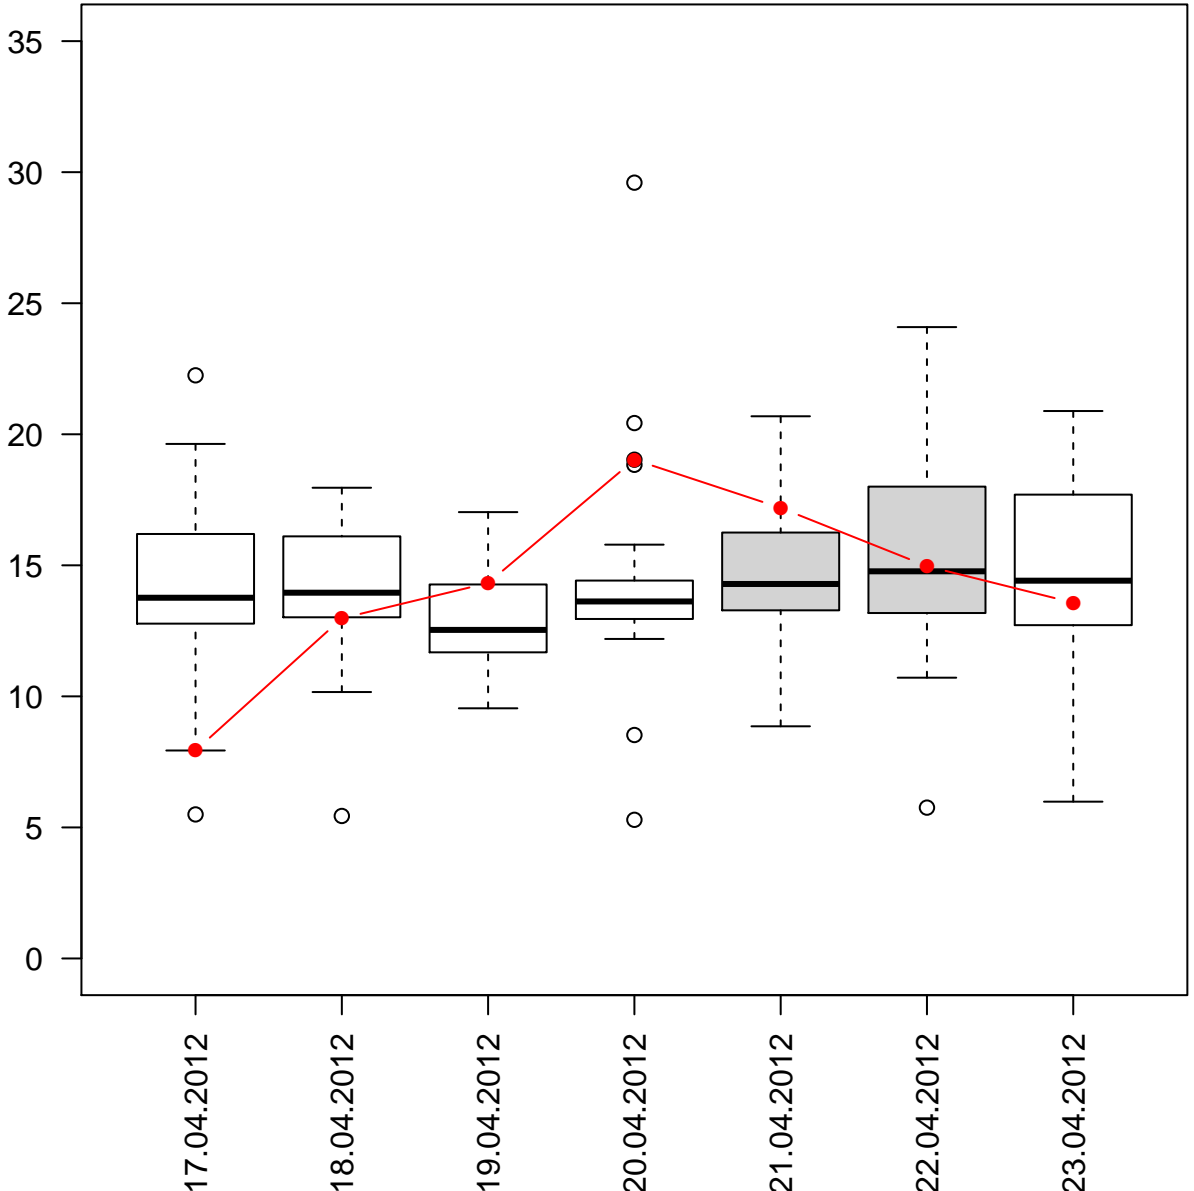



# AMP loads % per weekday

Paris

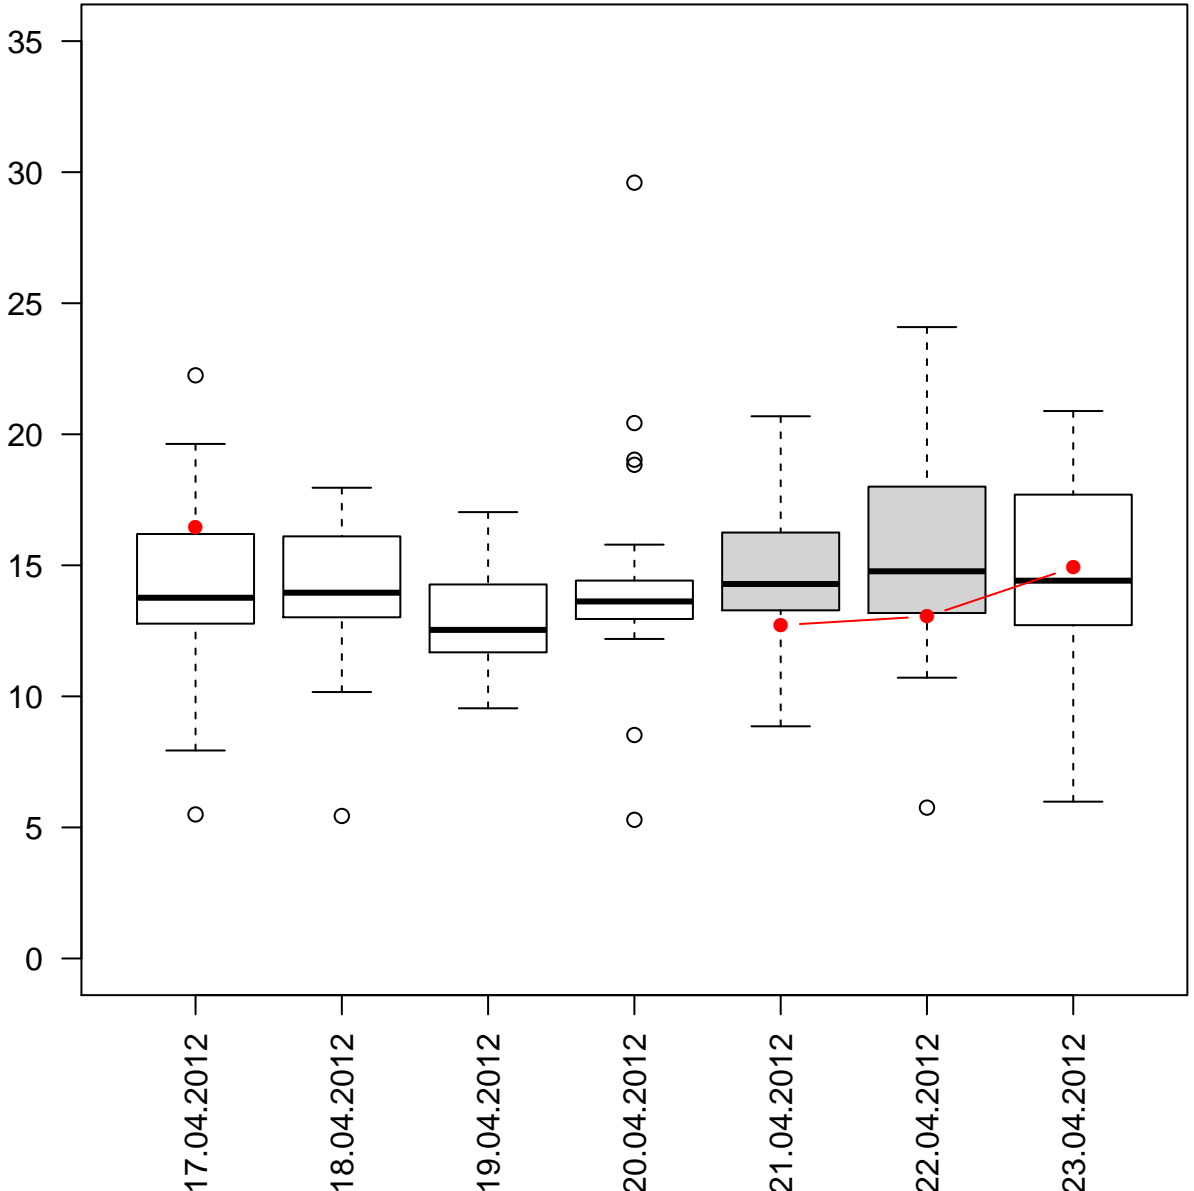

# AMP loads % per weekday

Zagreb

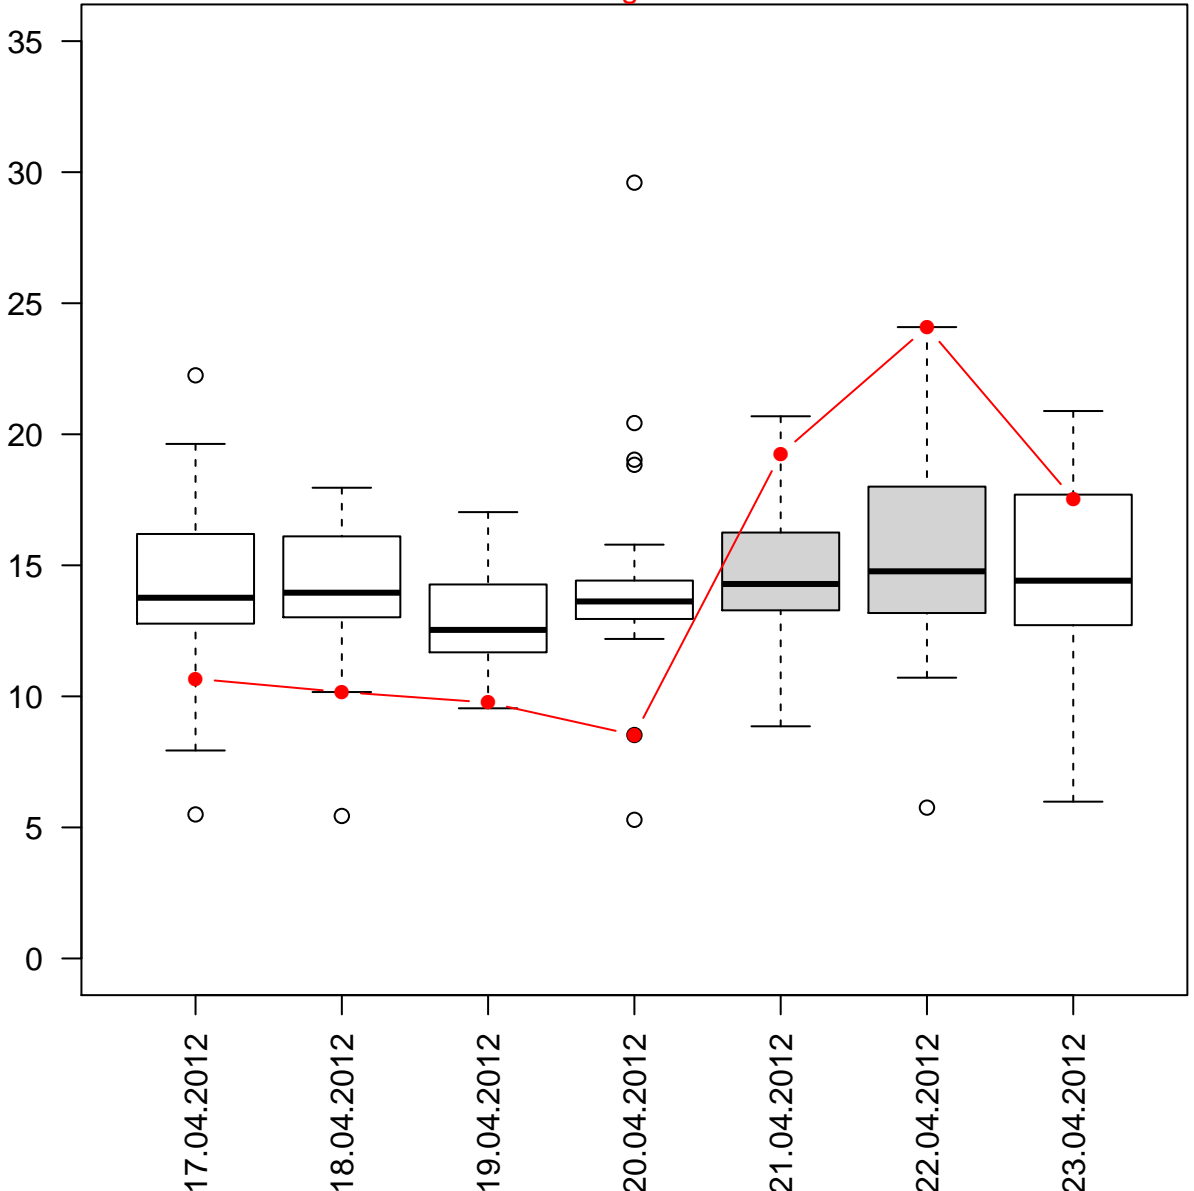

# AMP loads % per weekday

Milan

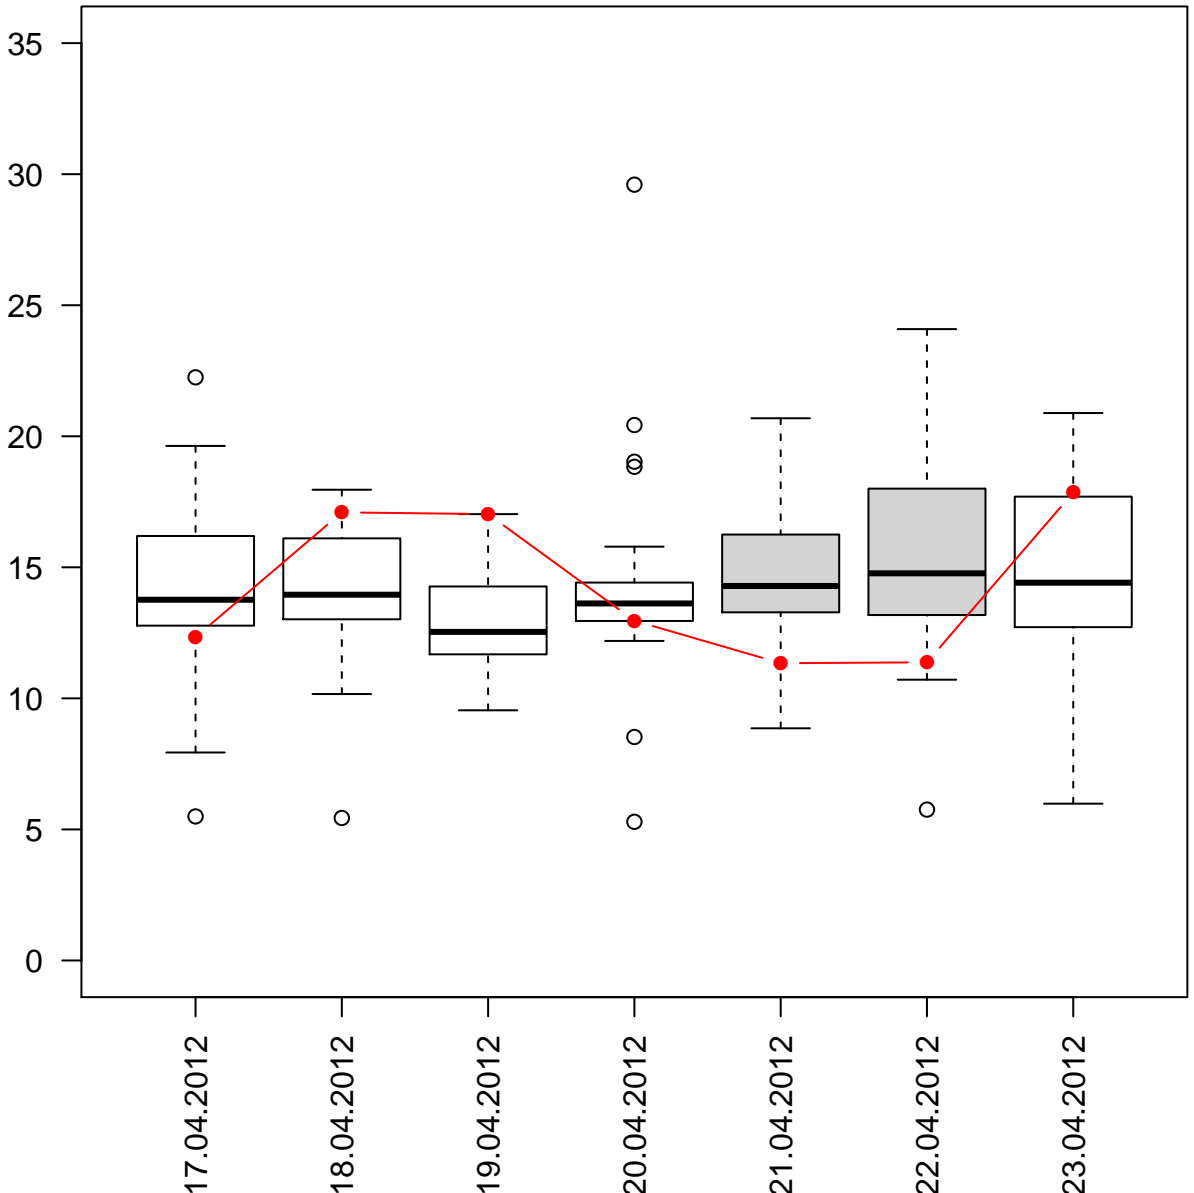

# AMP loads % per weekday

Amsterdam

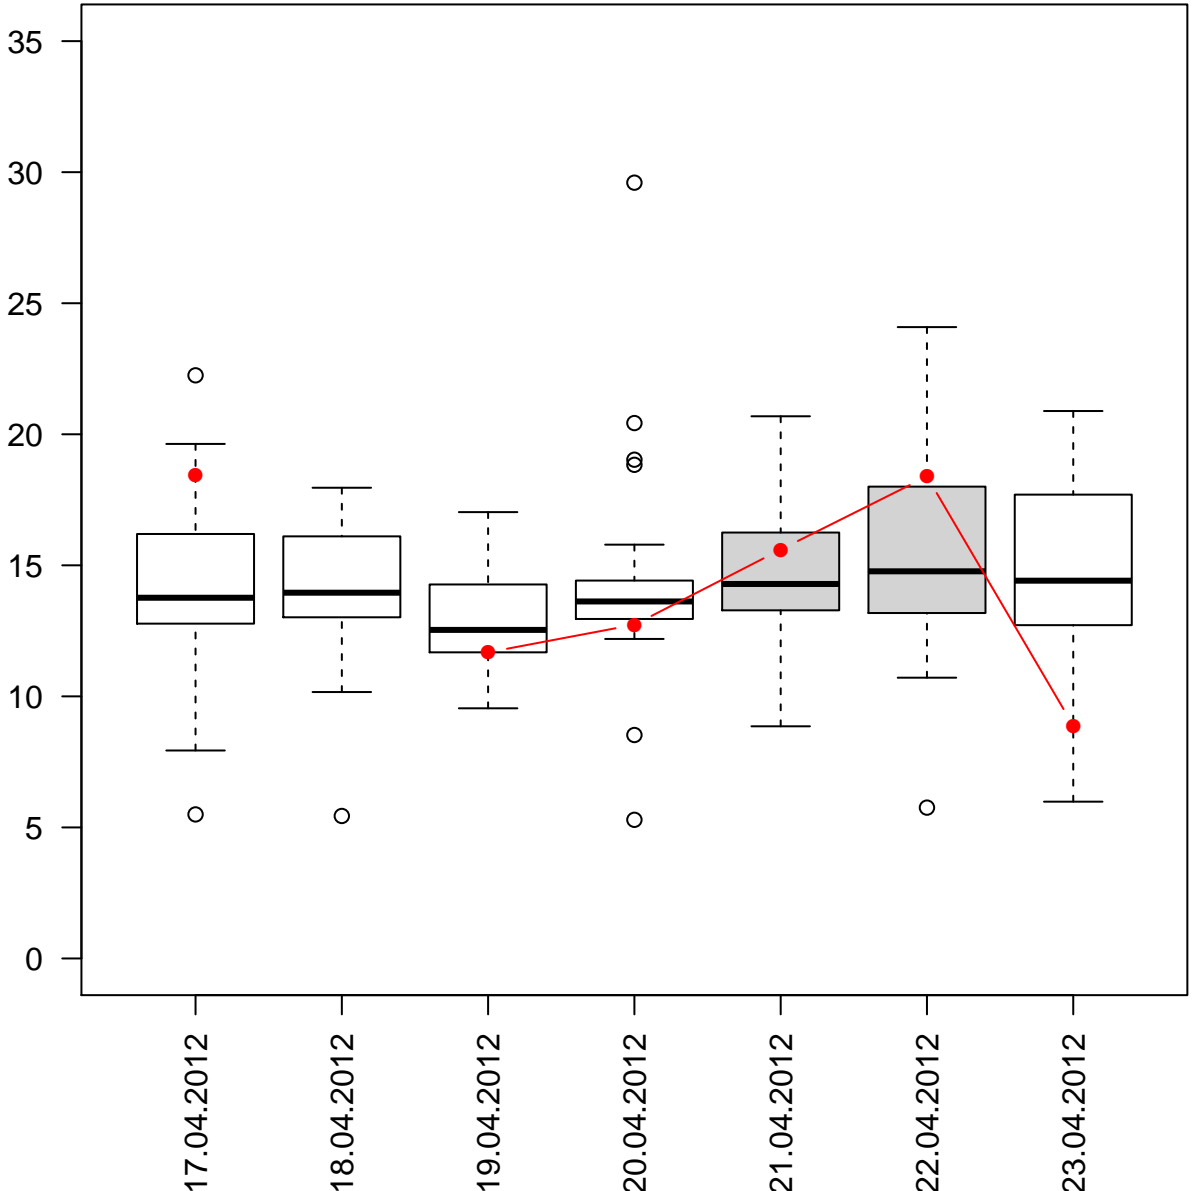

# AMP loads % per weekday

Eindhoven

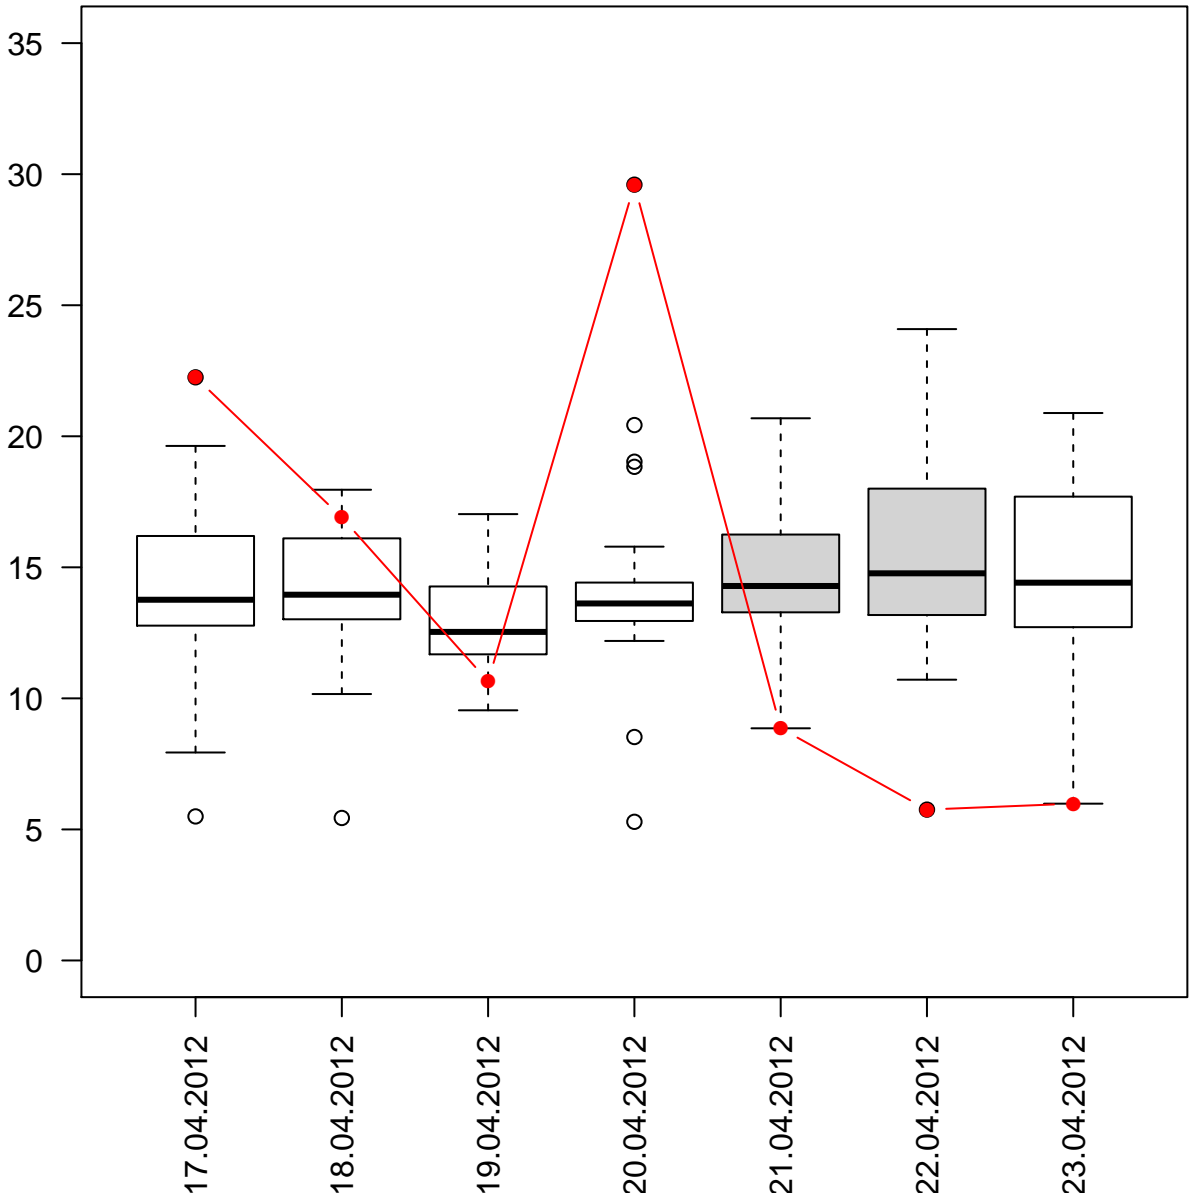

# AMP loads % per weekday

Utrecht

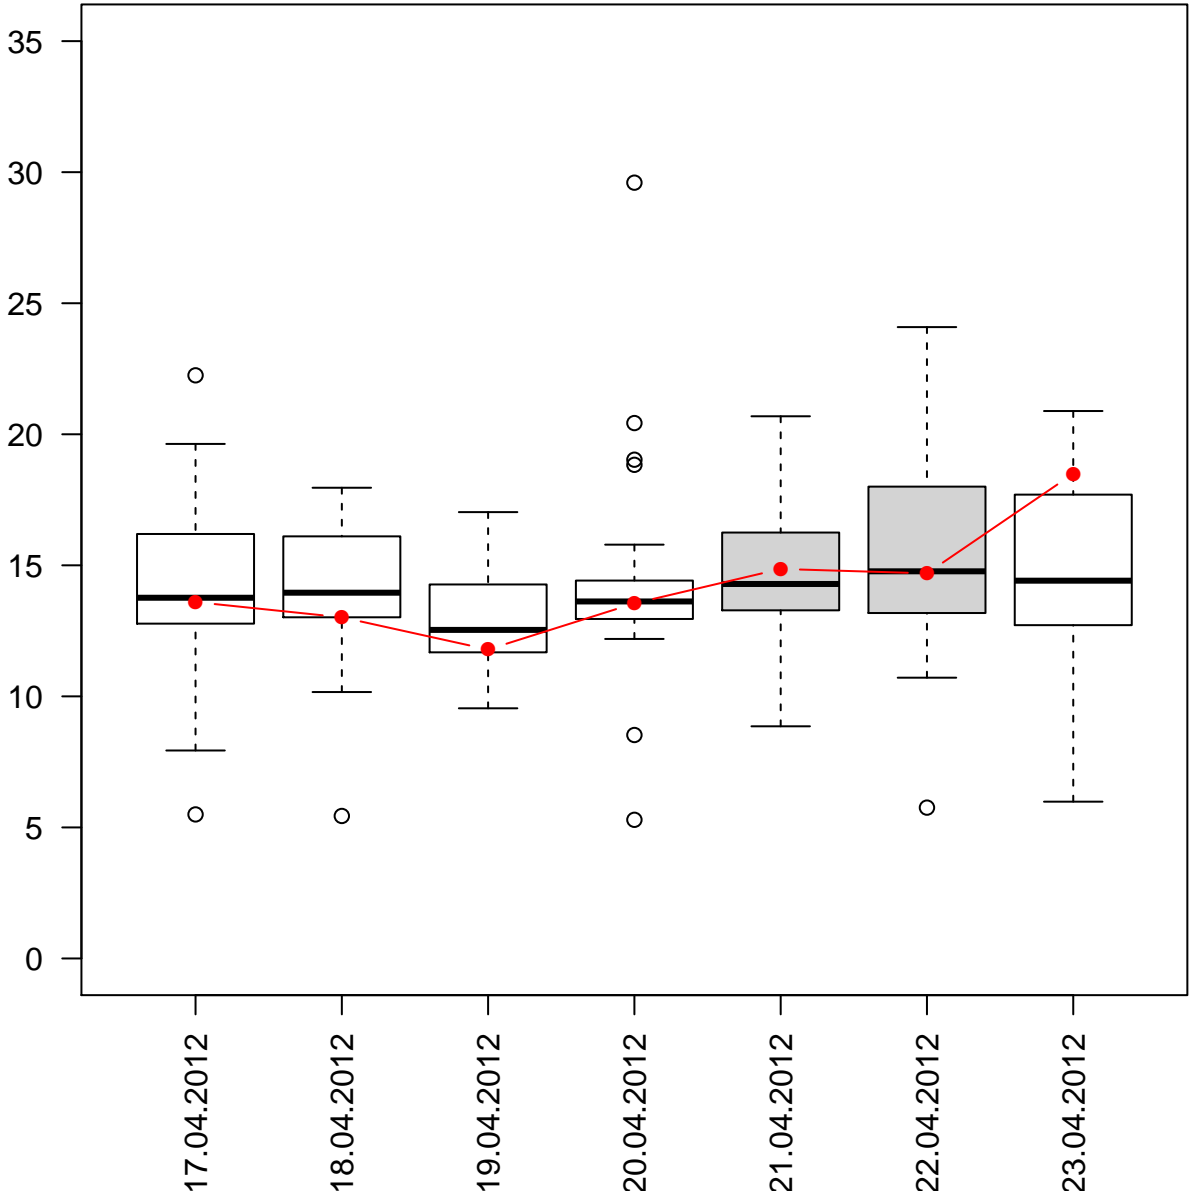

# AMP loads % per weekday

Oslo

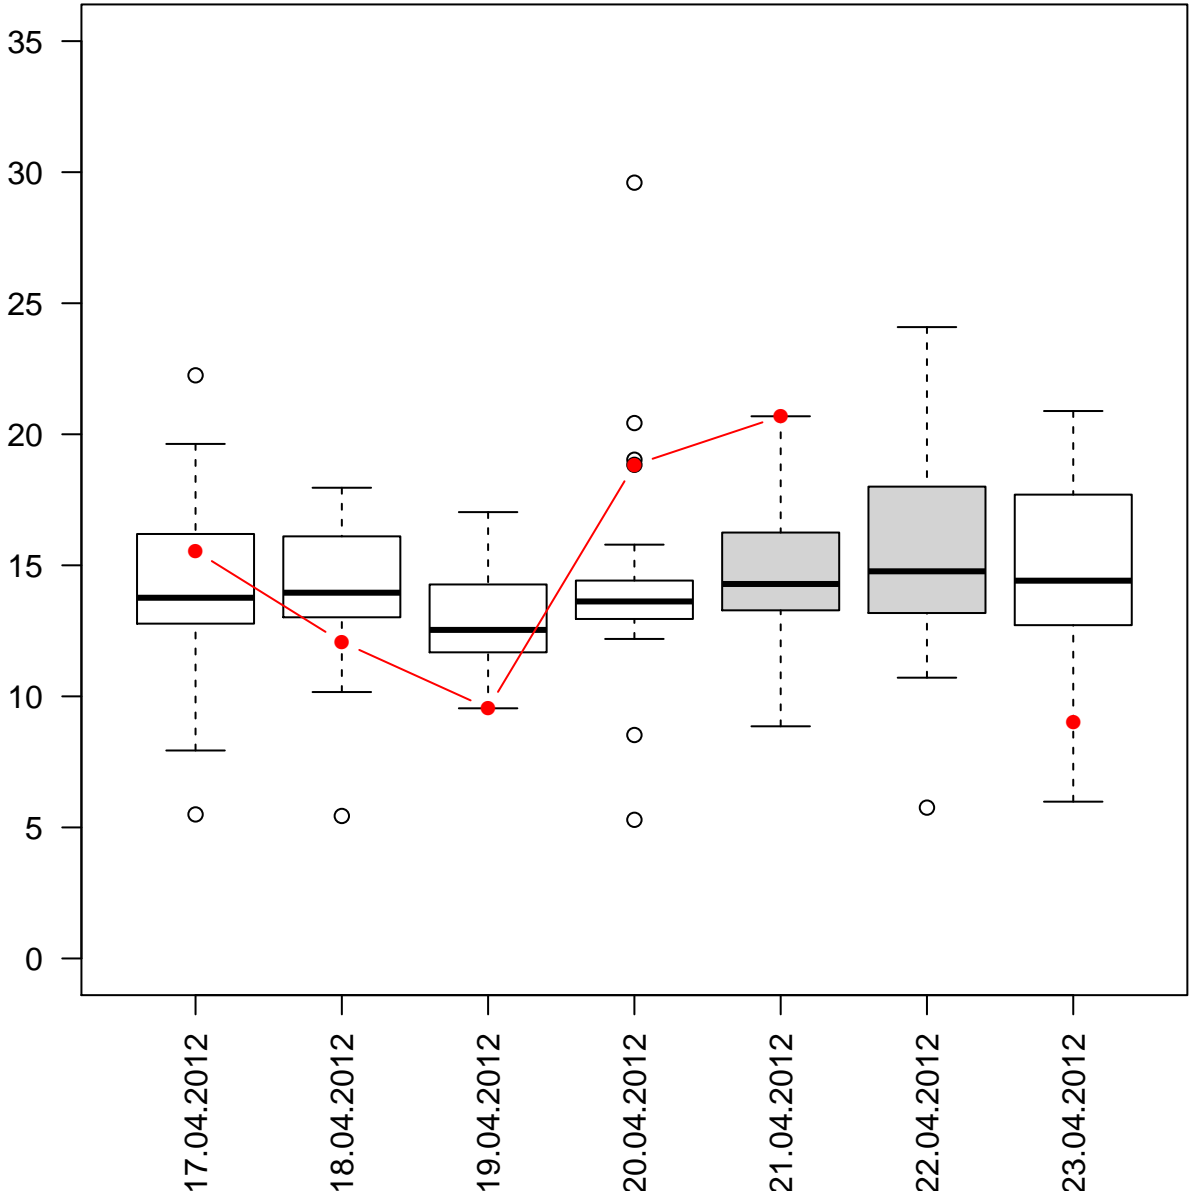

# AMP loads % per weekday

Gothenburg

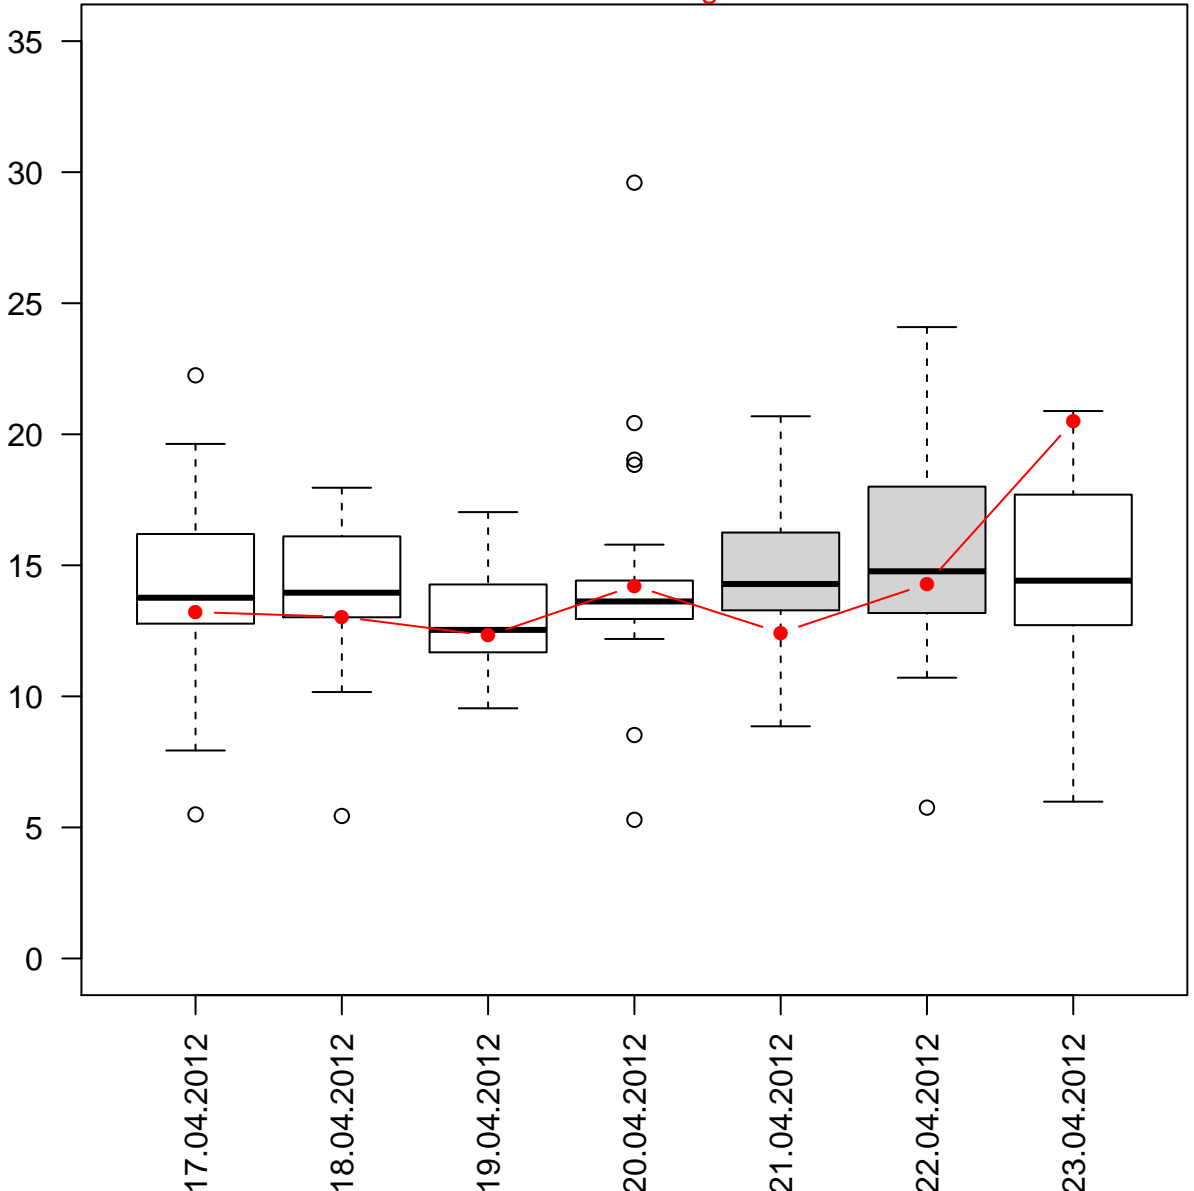



# AMP loads % per weekday

Umeå

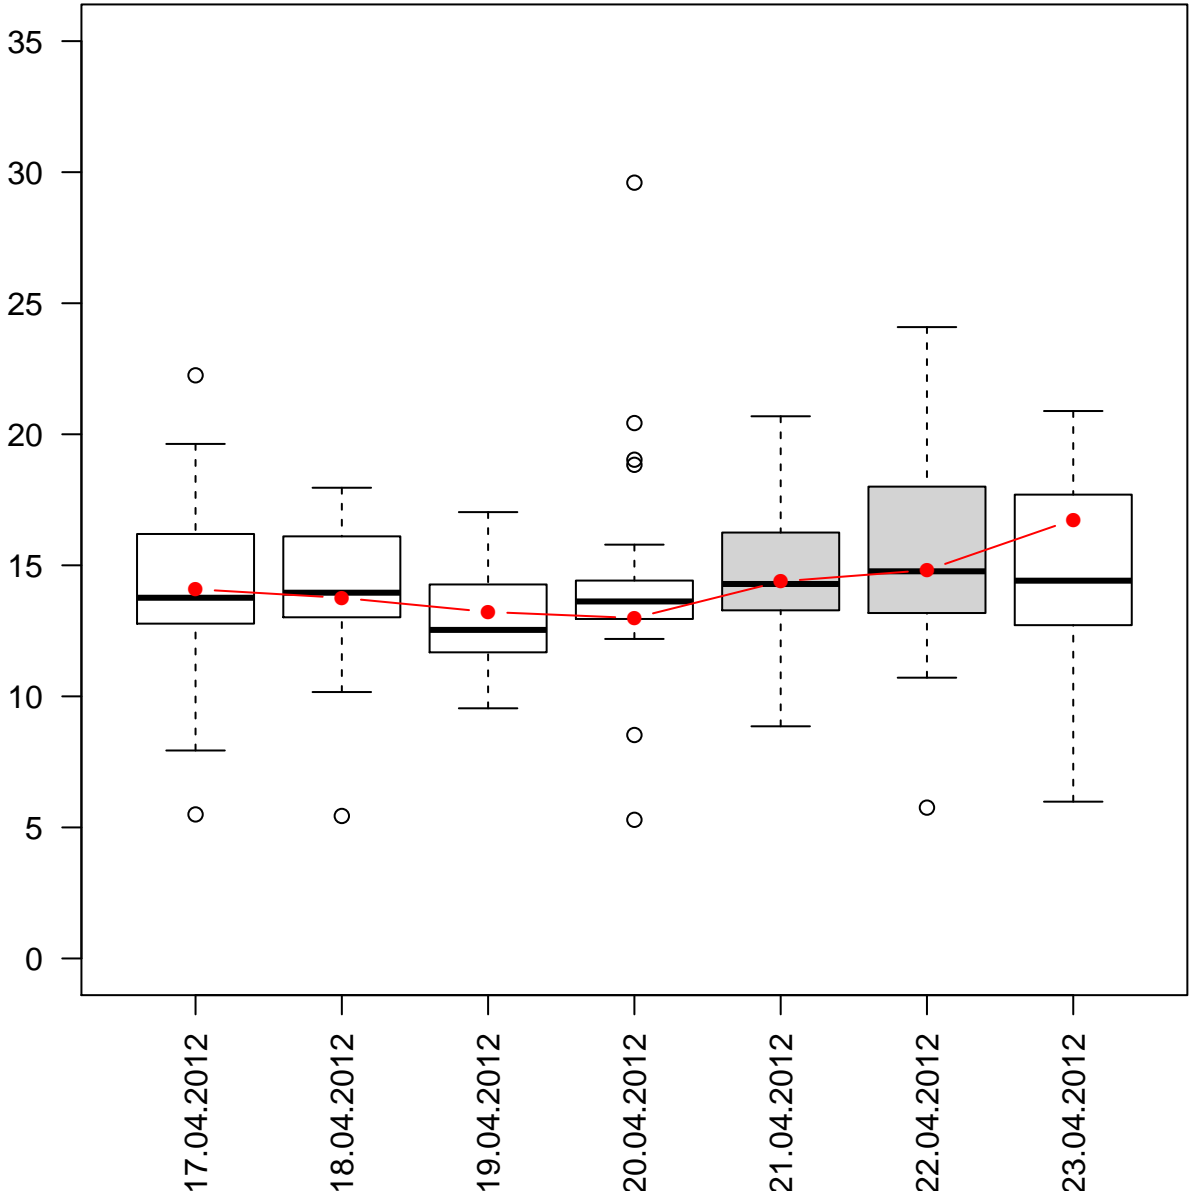

# METH loads % per weekday

Antwerp Z.

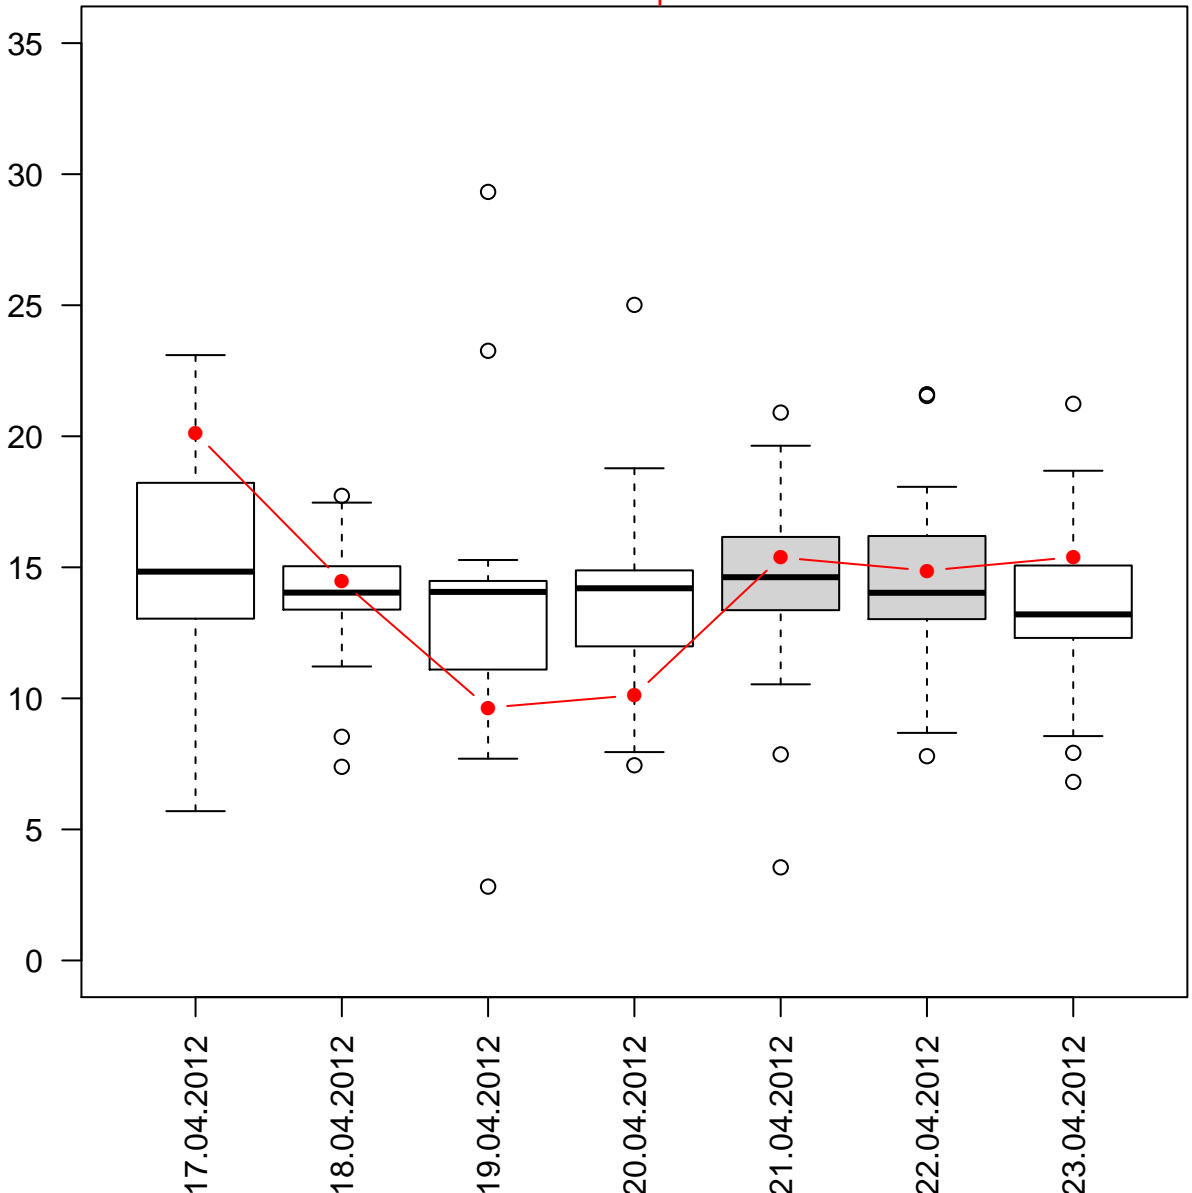

# METH loads % per weekday

Antwerp D.

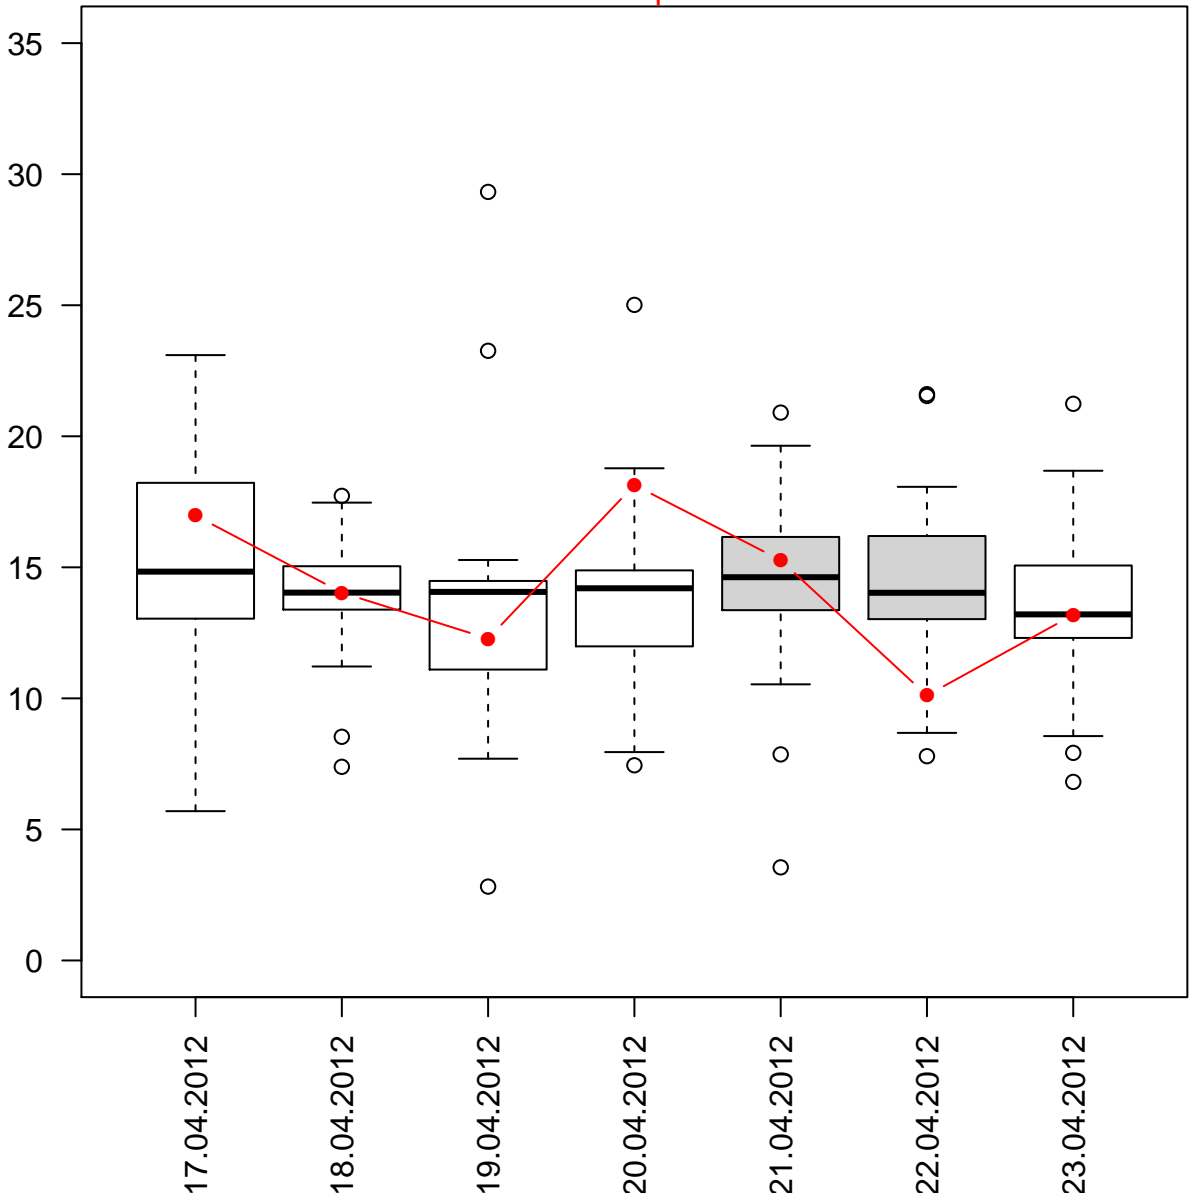

# METH loads % per weekday

Brussels

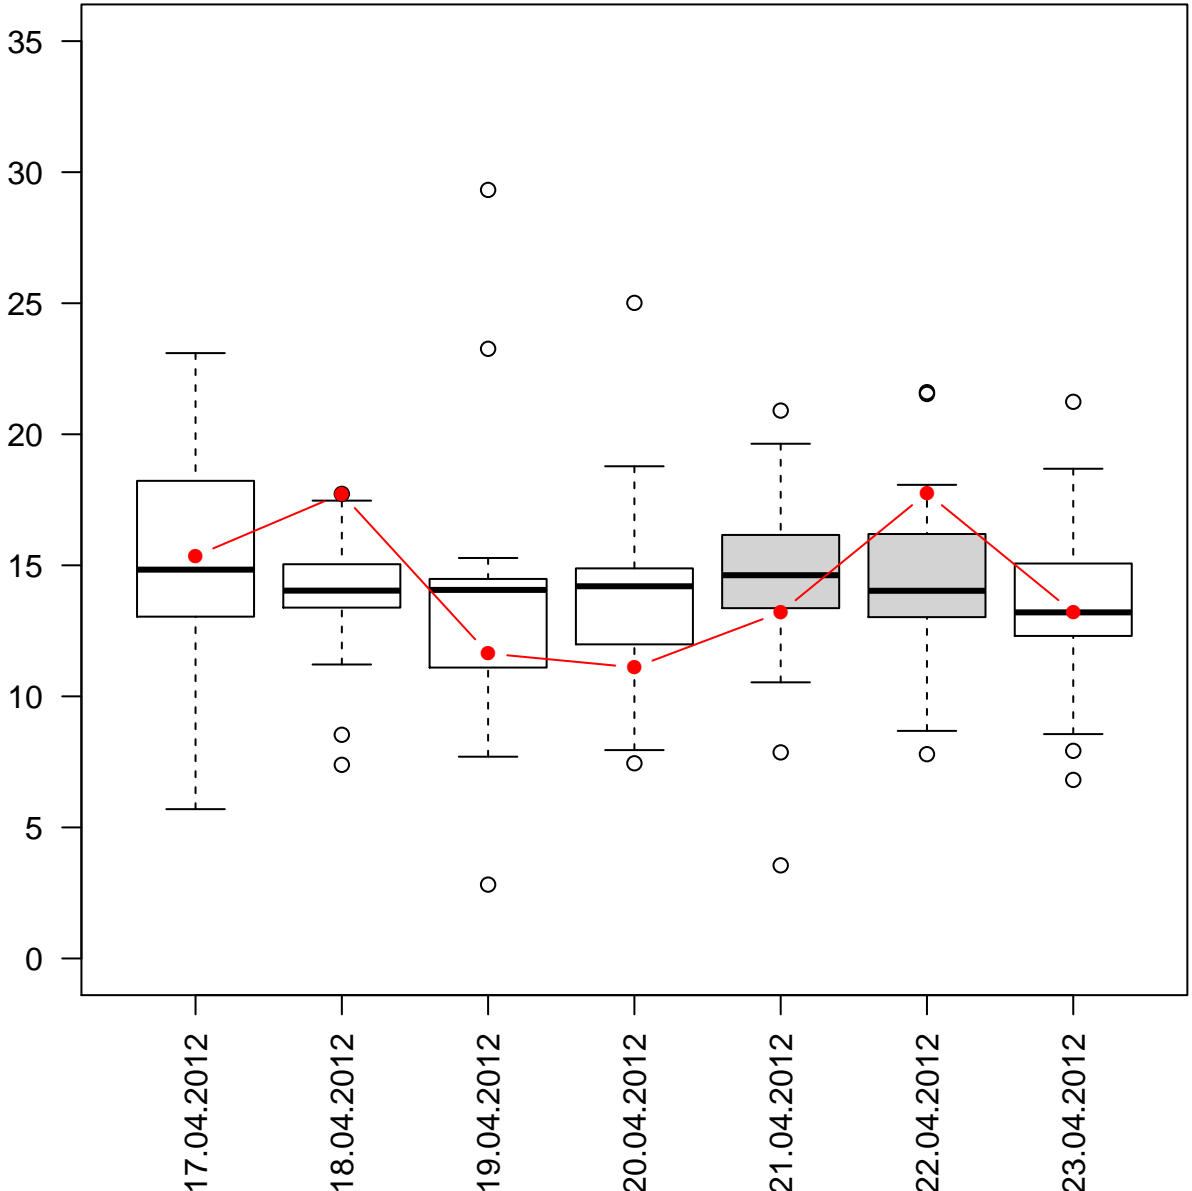

# METH loads % per weekday

Basel

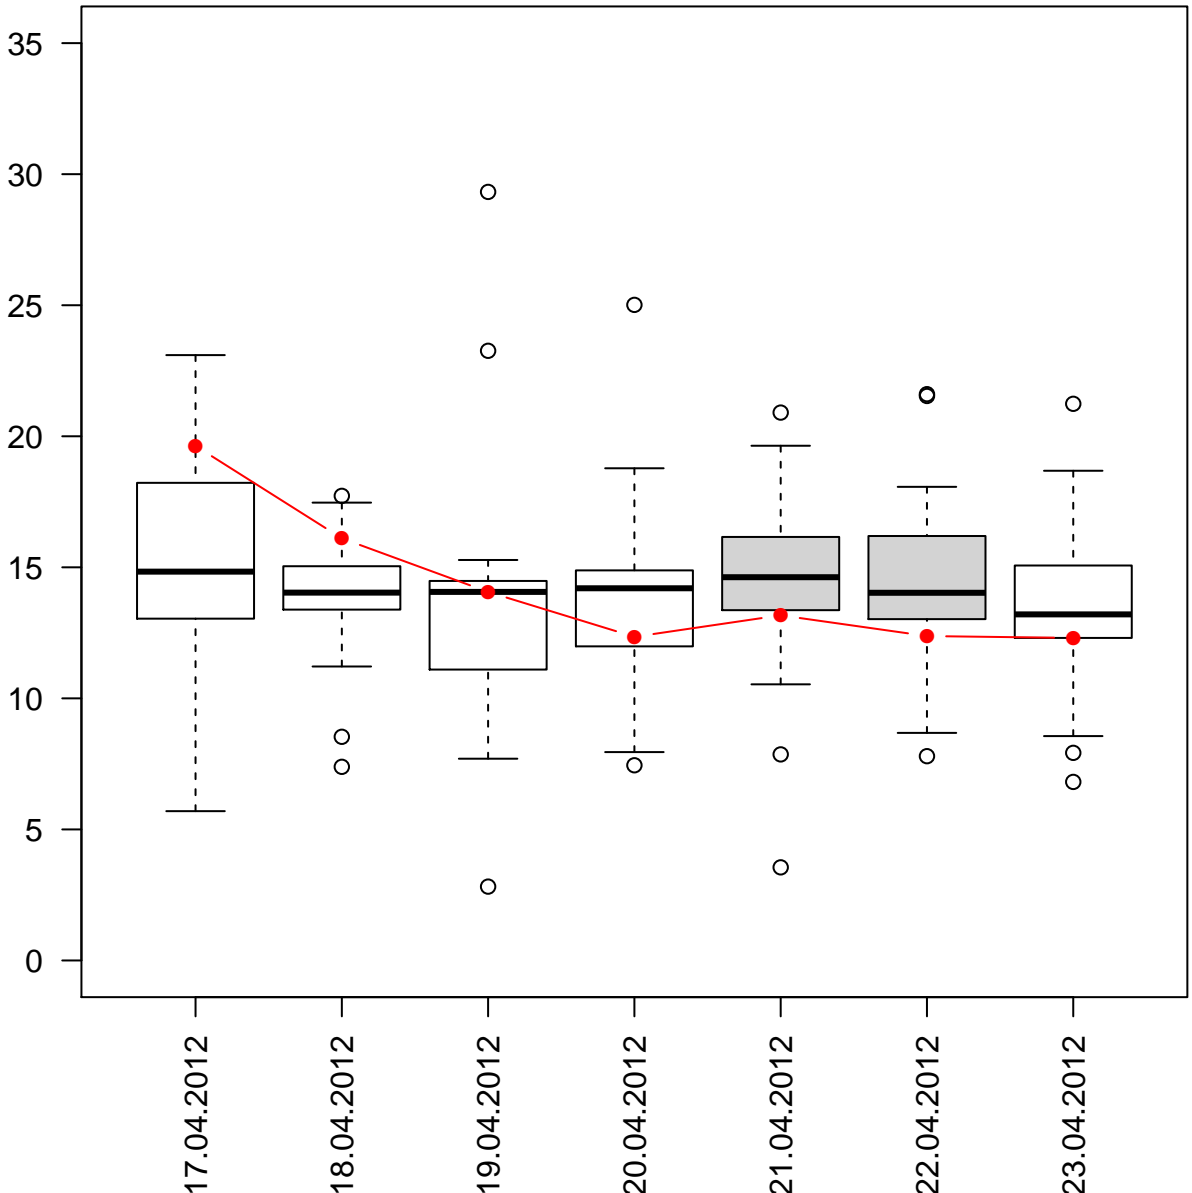

# METH loads % per weekday

Berne

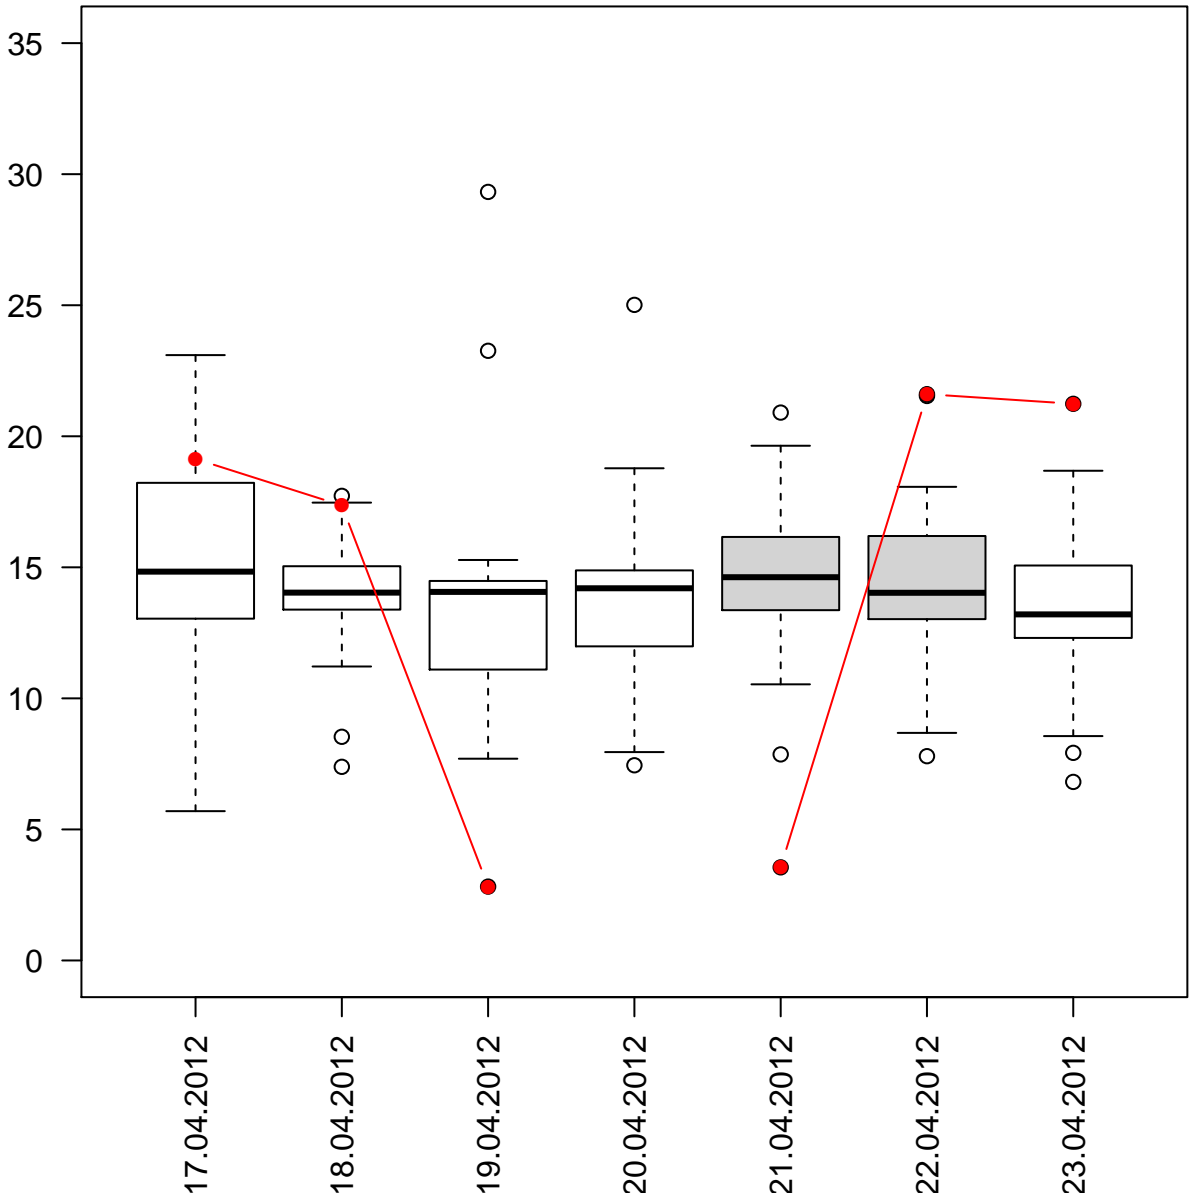

# METH loads % per weekday

Geneva

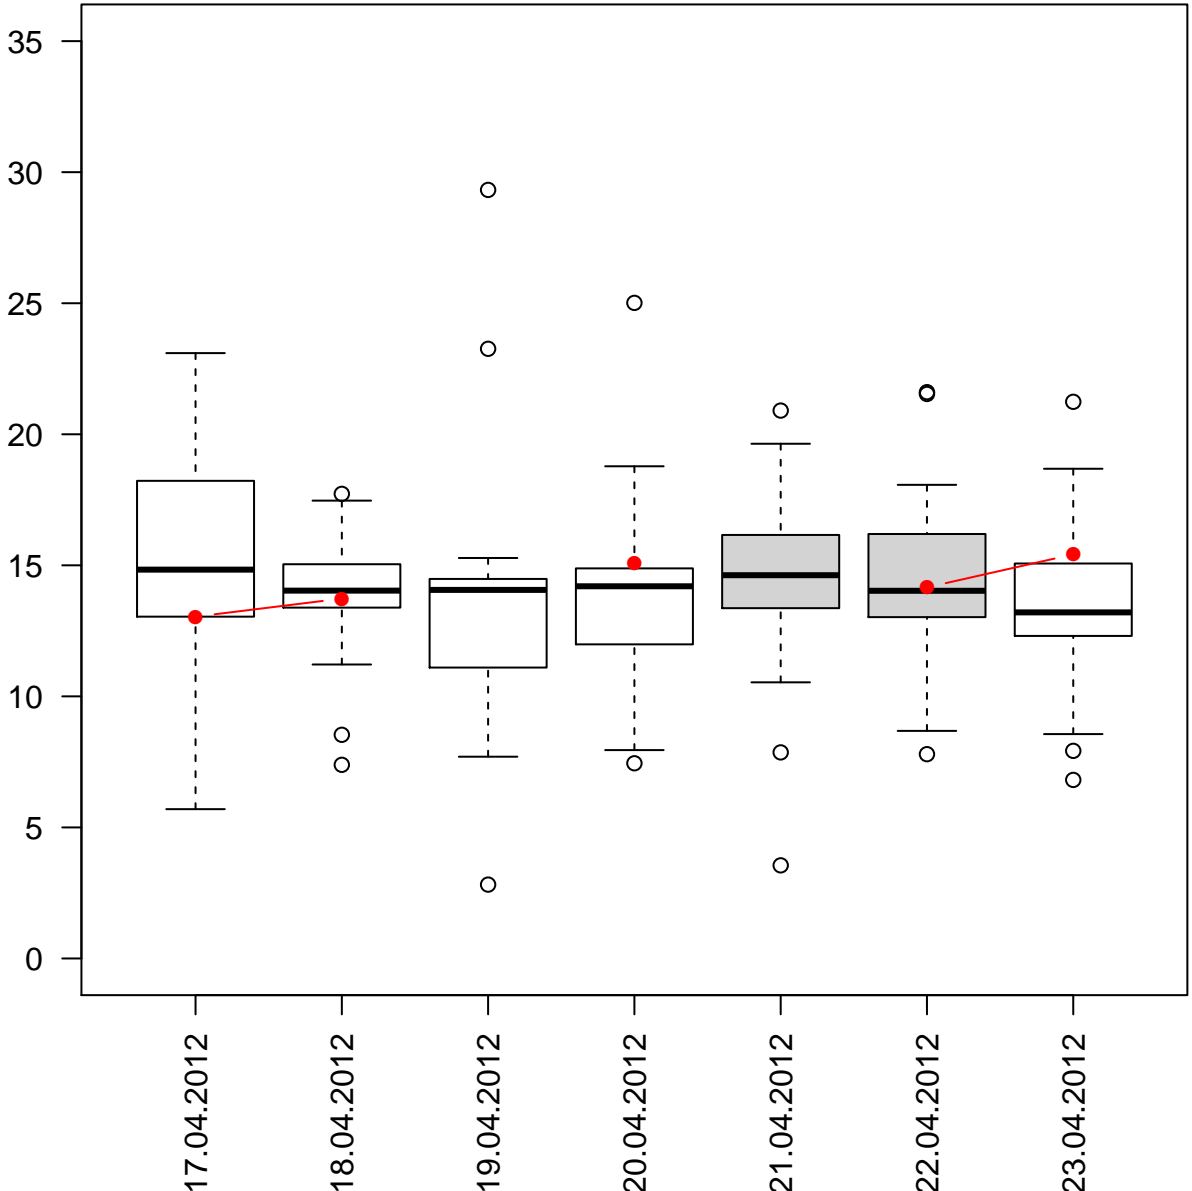

# METH loads % per weekday

St.Gallen A.

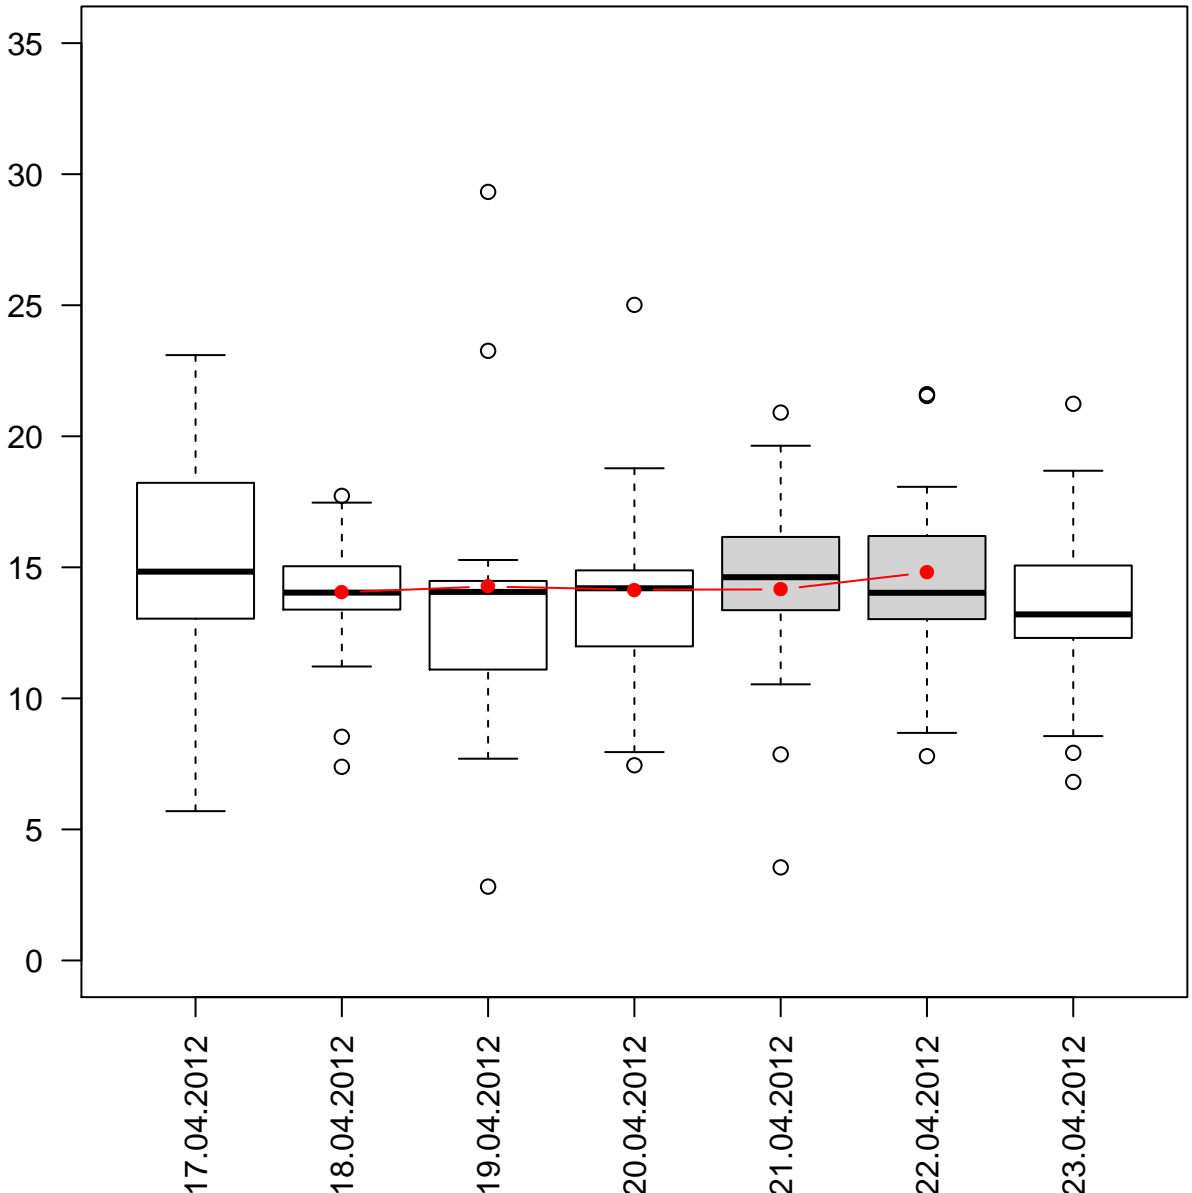



# METH loads % per weekday

St.Gallen H.

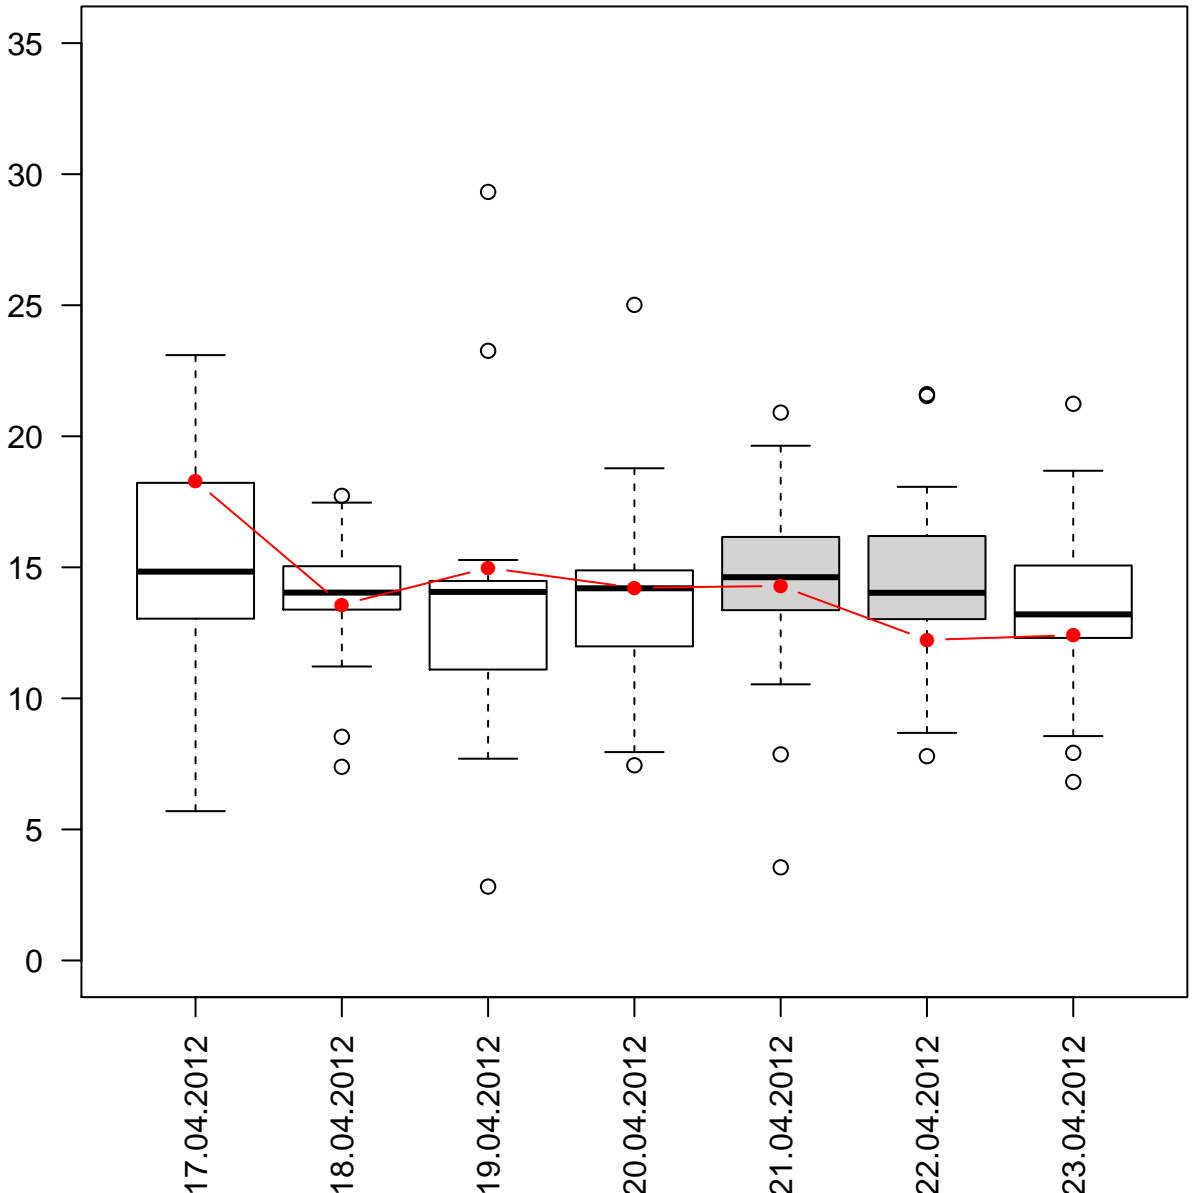

# METH loads % per weekday

Zurich

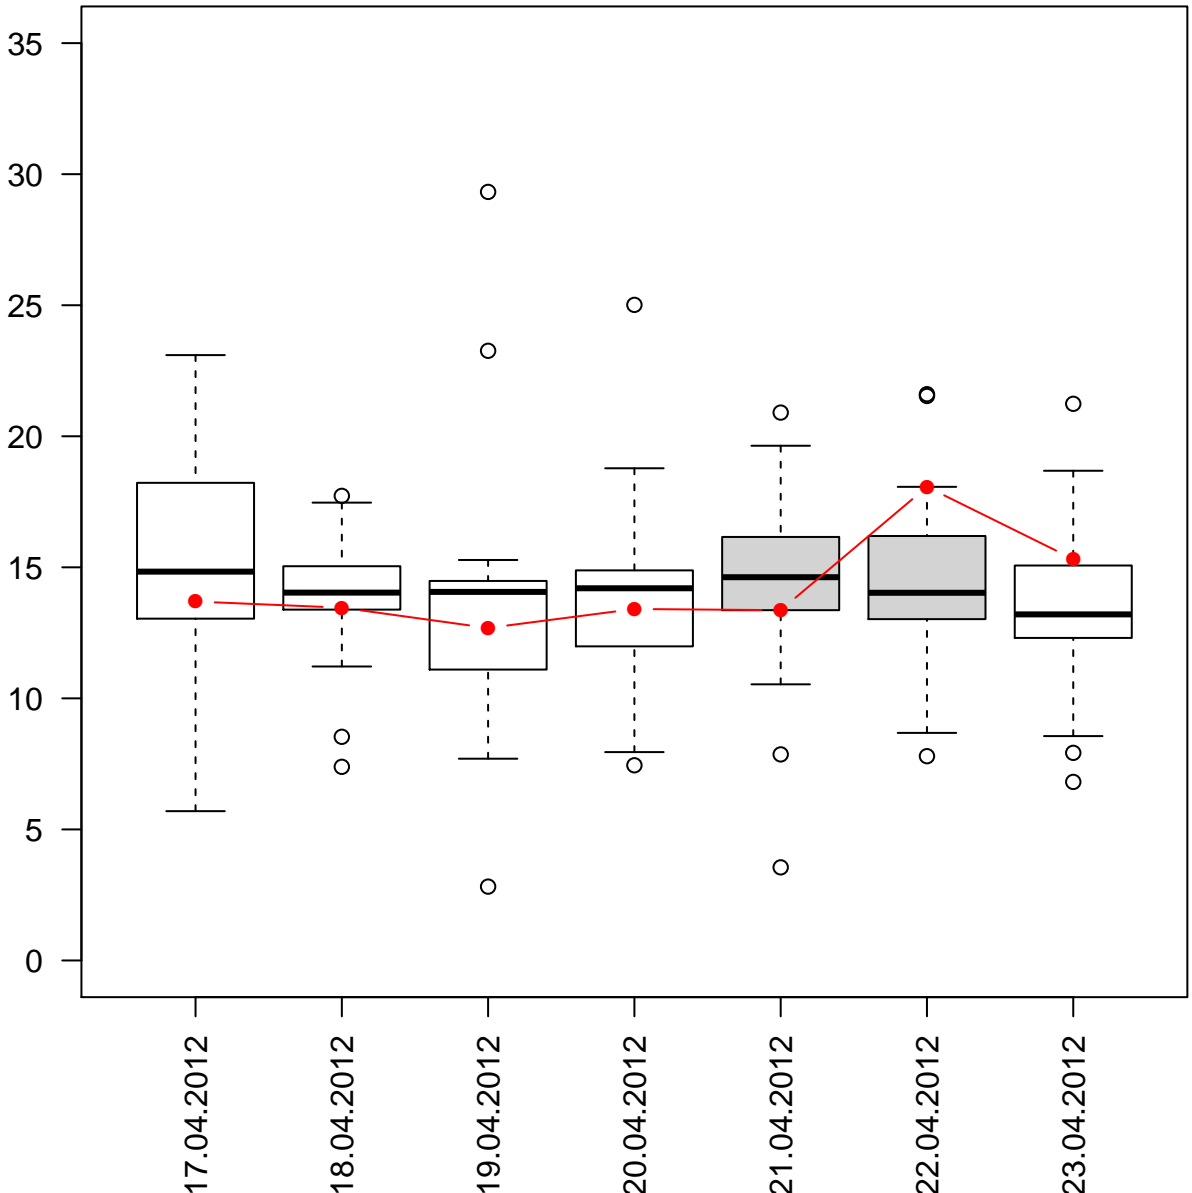

# METH loads % per weekday

Budweis

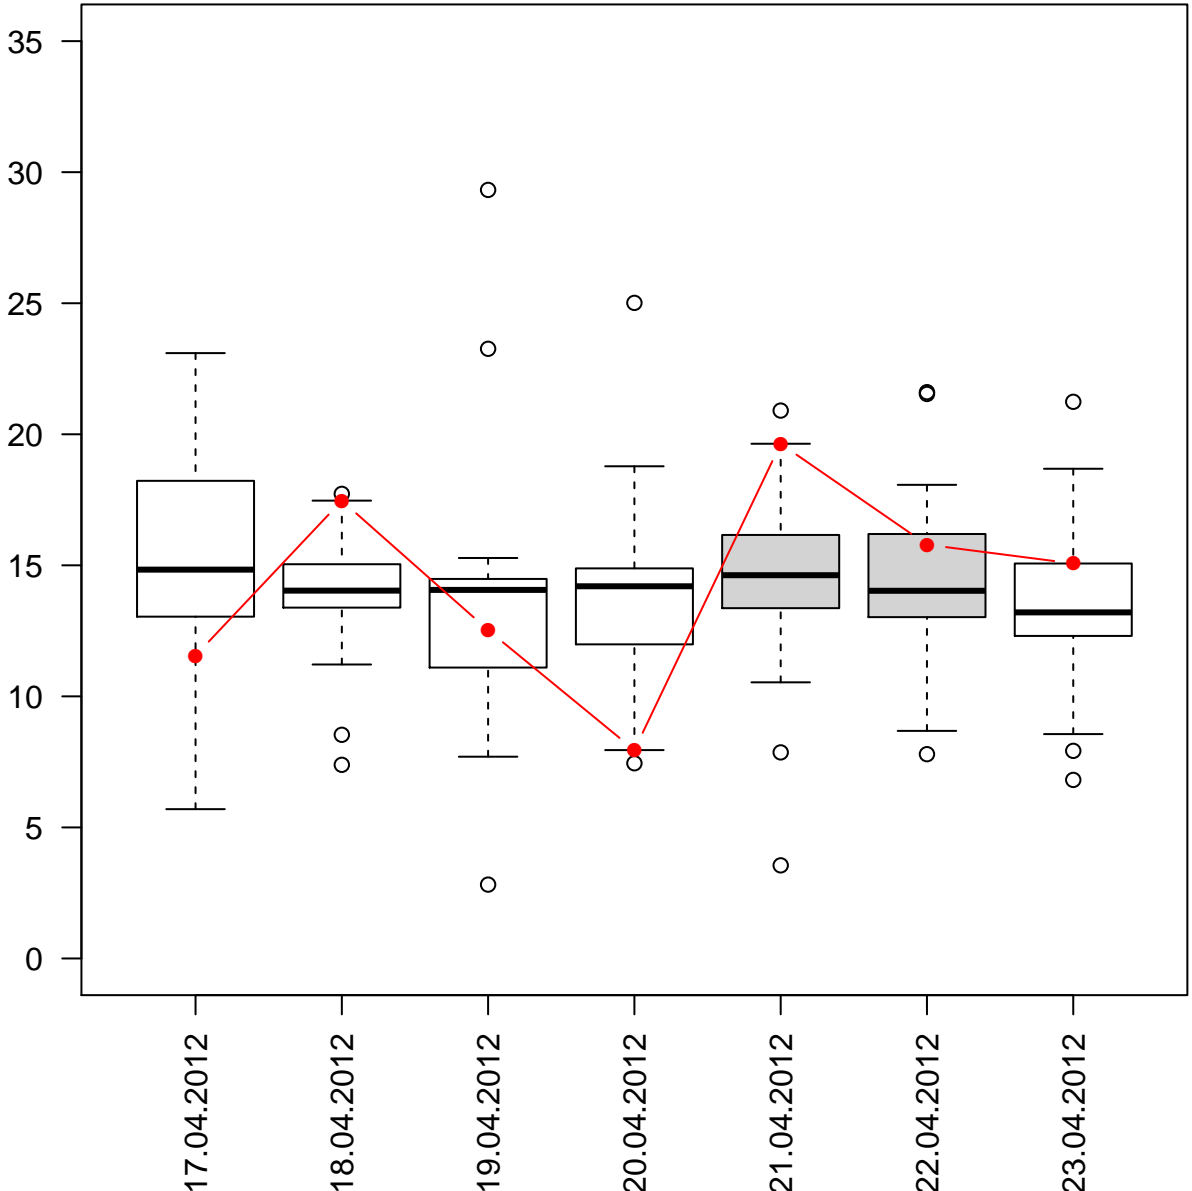

# METH loads % per weekday

Prague

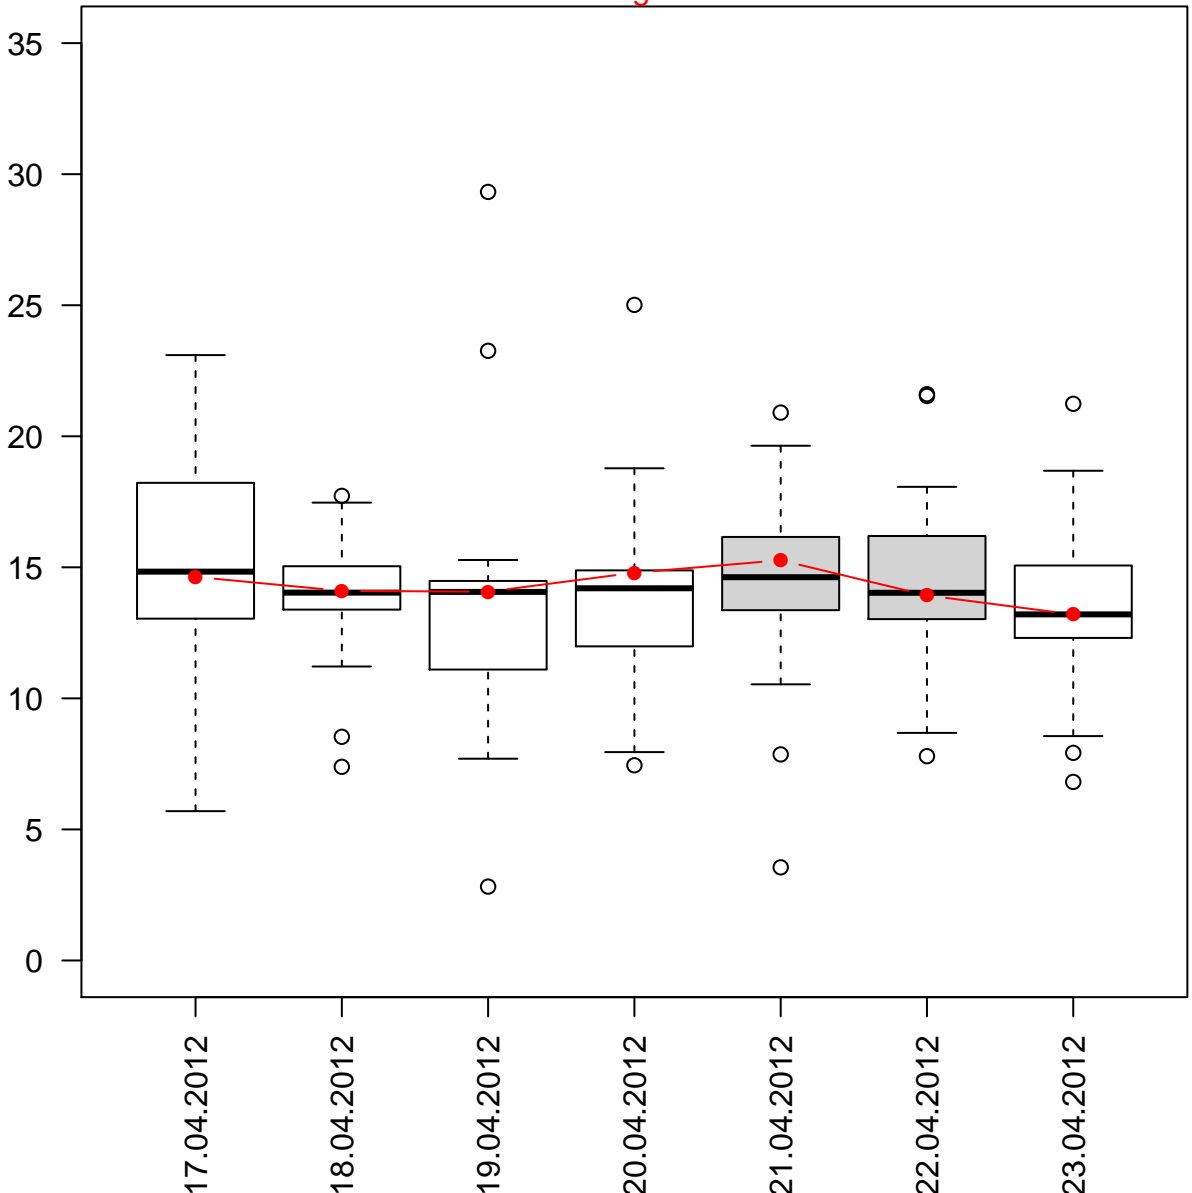

# METH loads % per weekday

Castellon

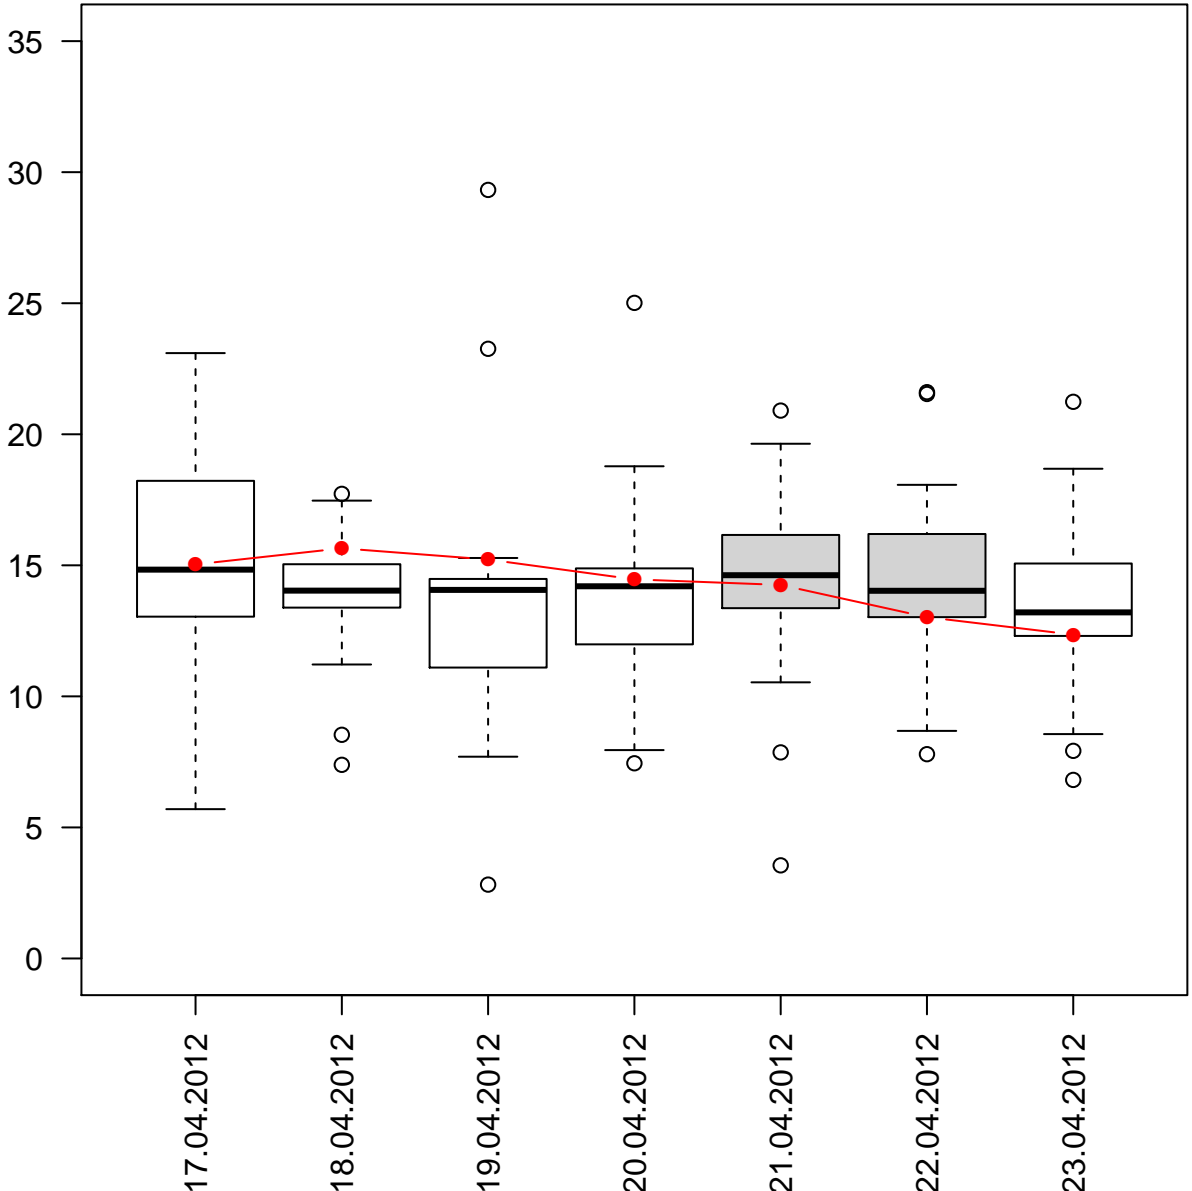

# METH loads % per weekday

Santiago

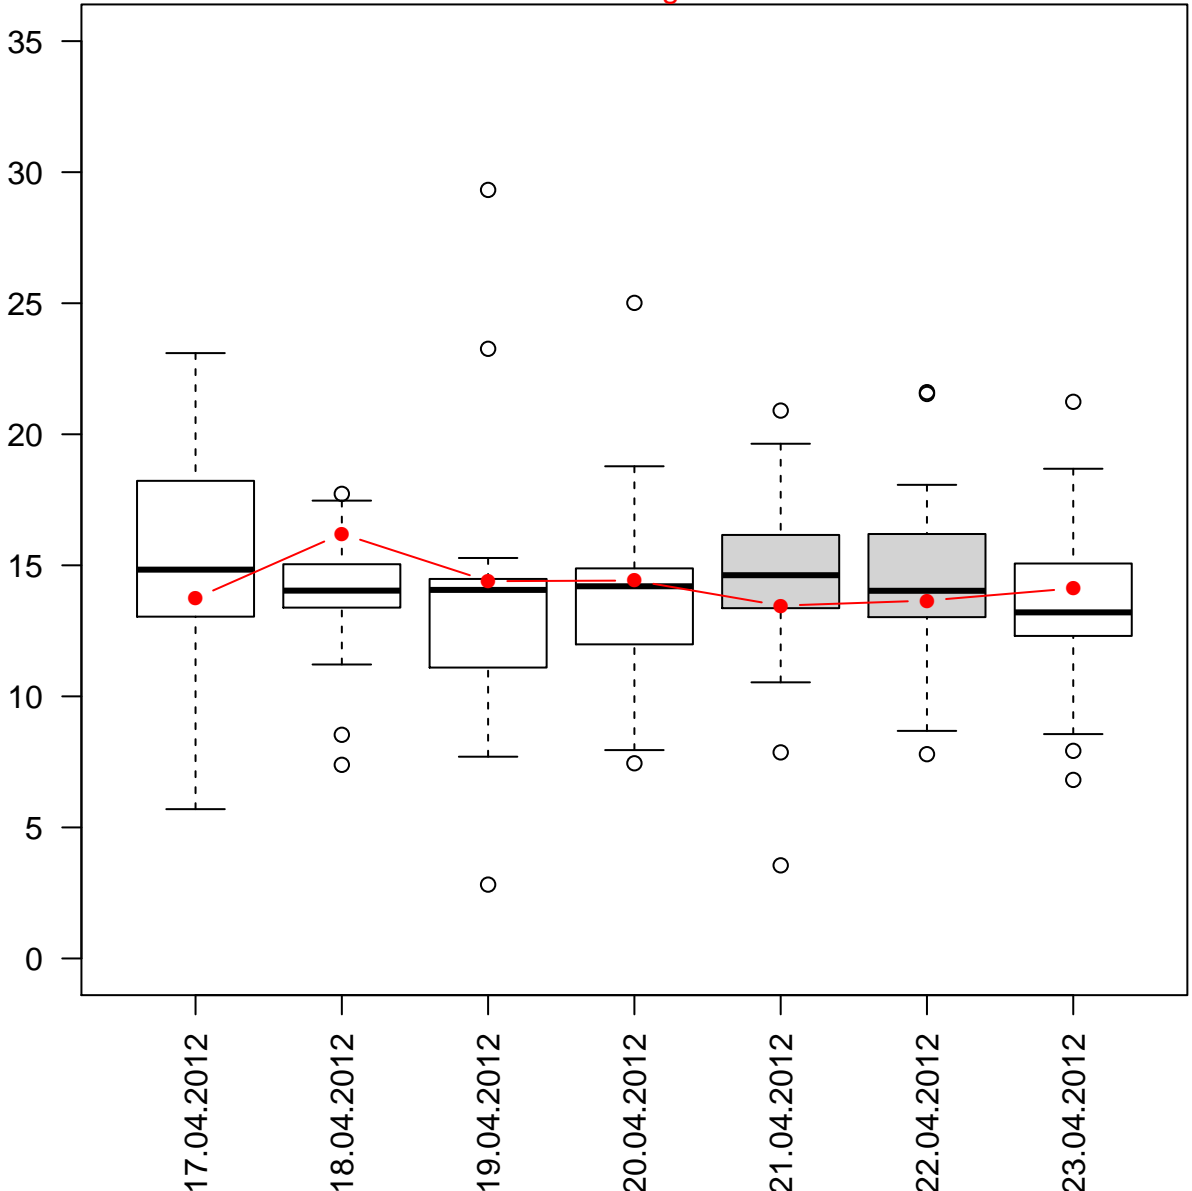

# METH loads % per weekday

Barcelona

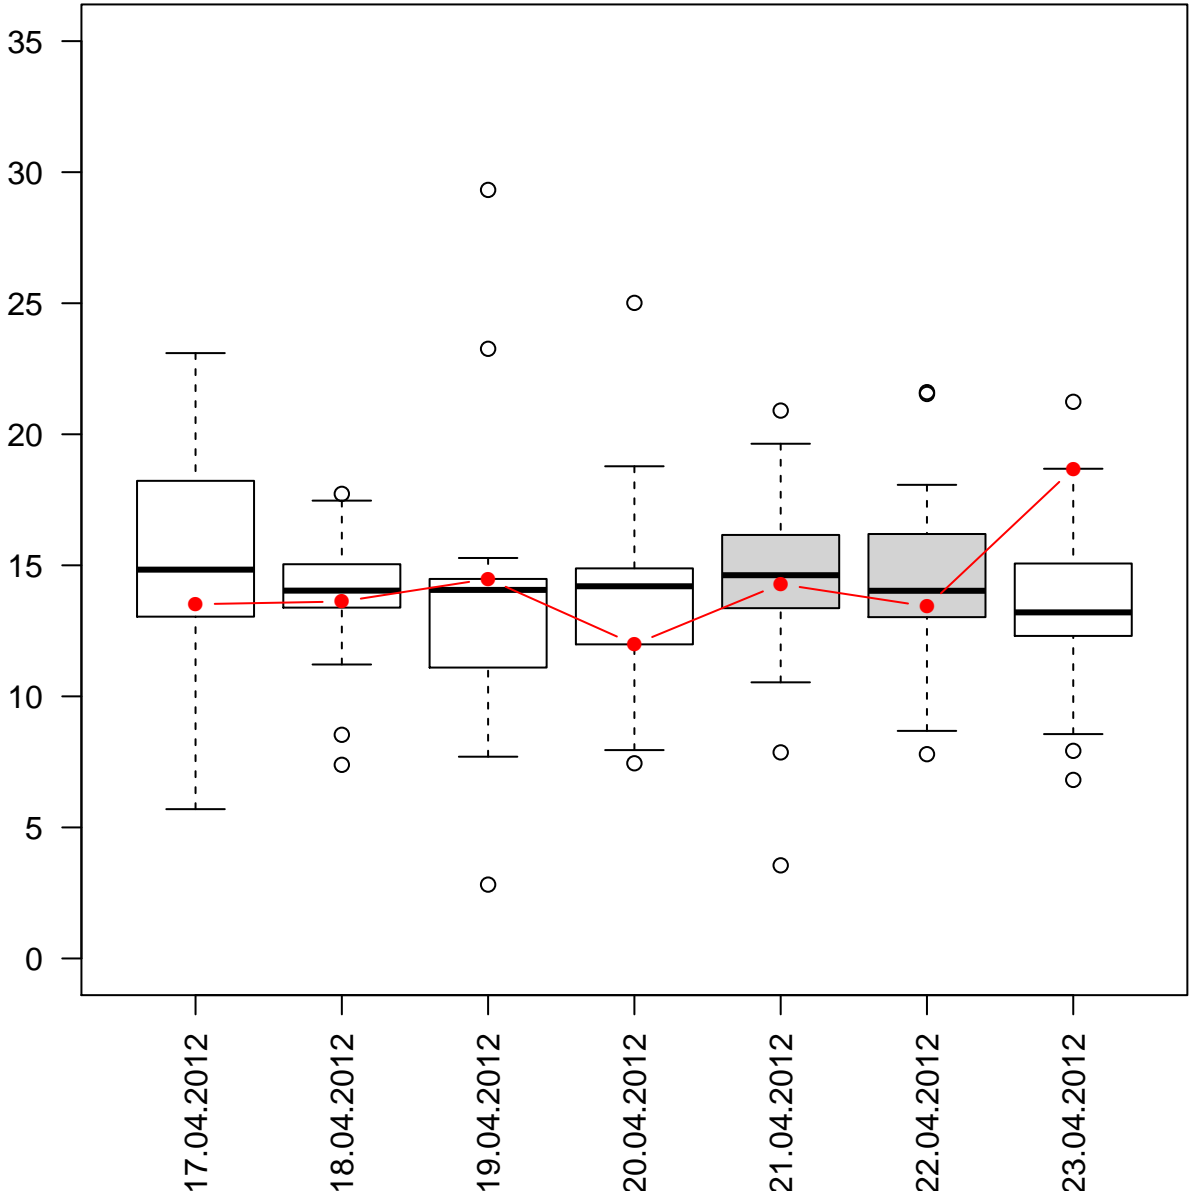

# METH loads % per weekday

Helsinki

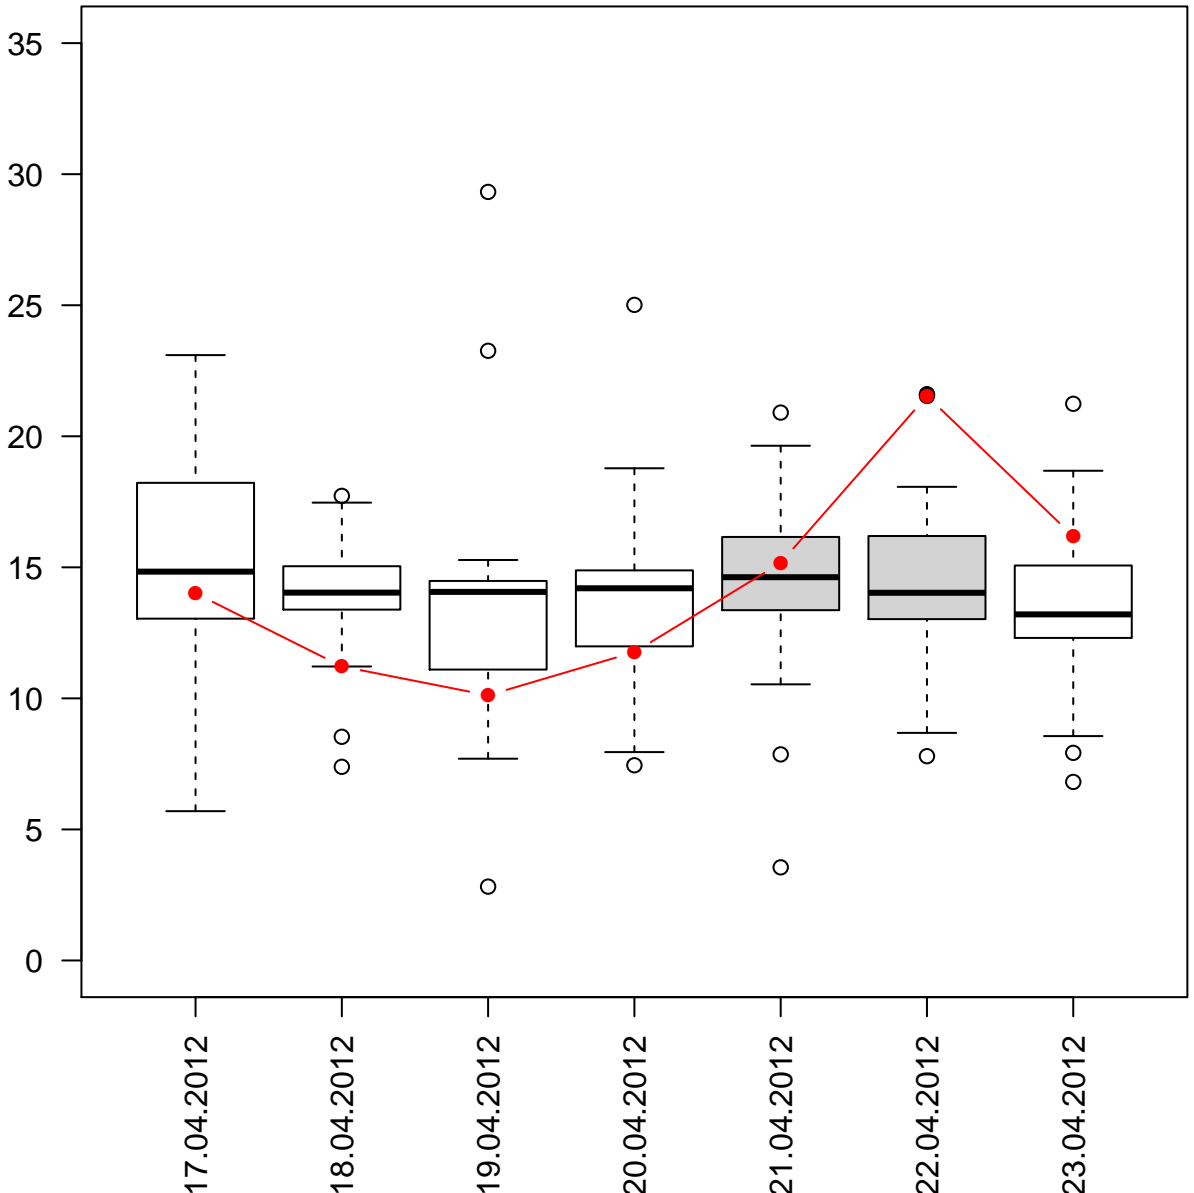



# METH loads % per weekday

Turku

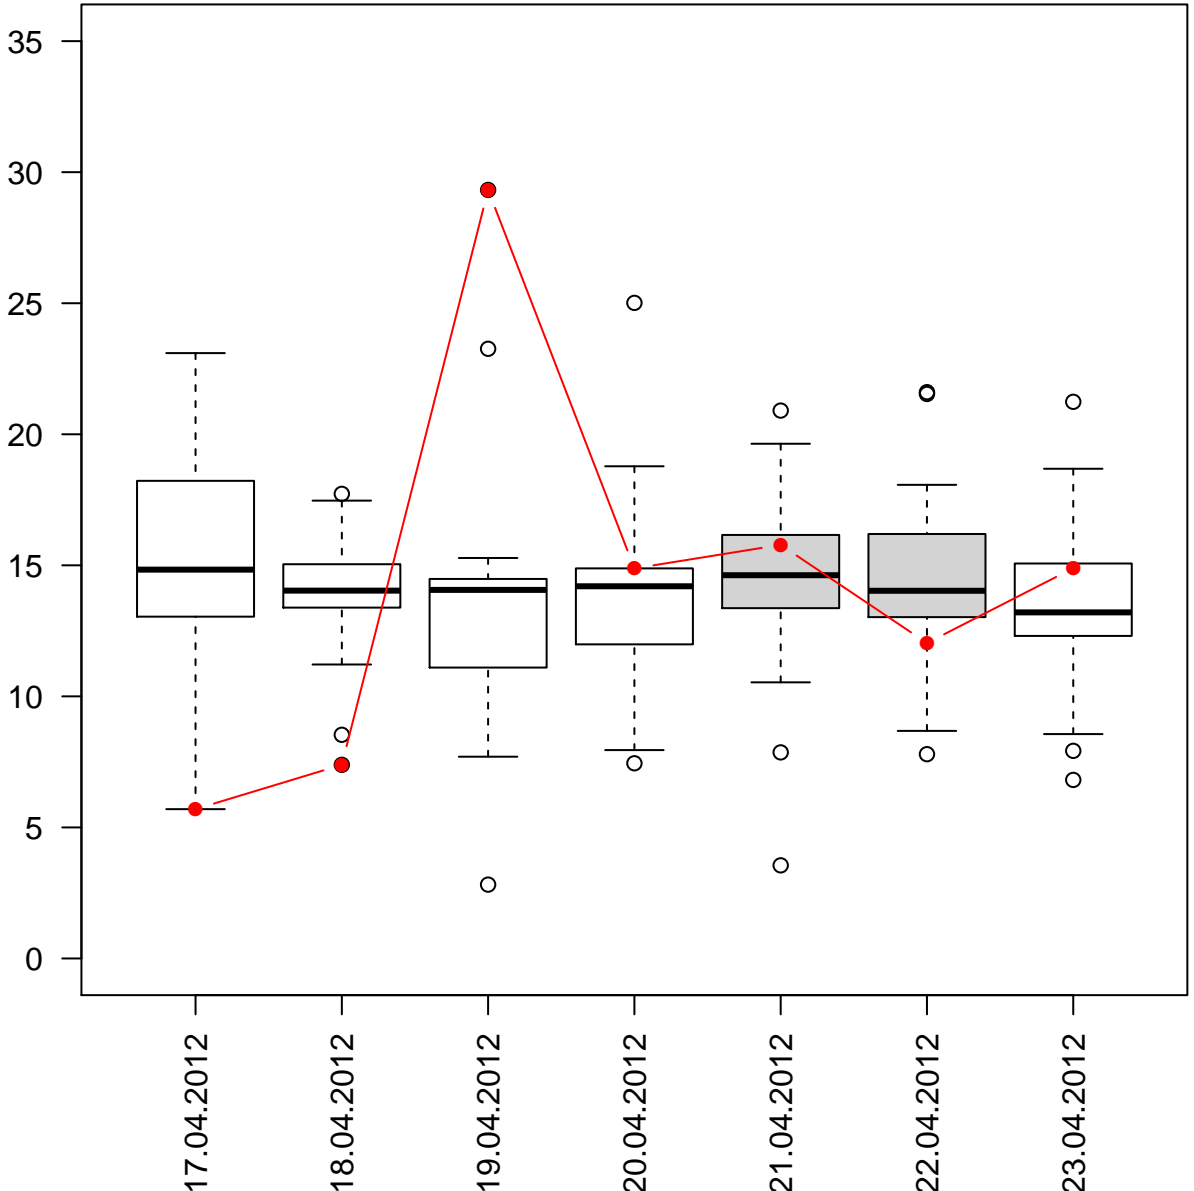

# METH loads % per weekday

Paris

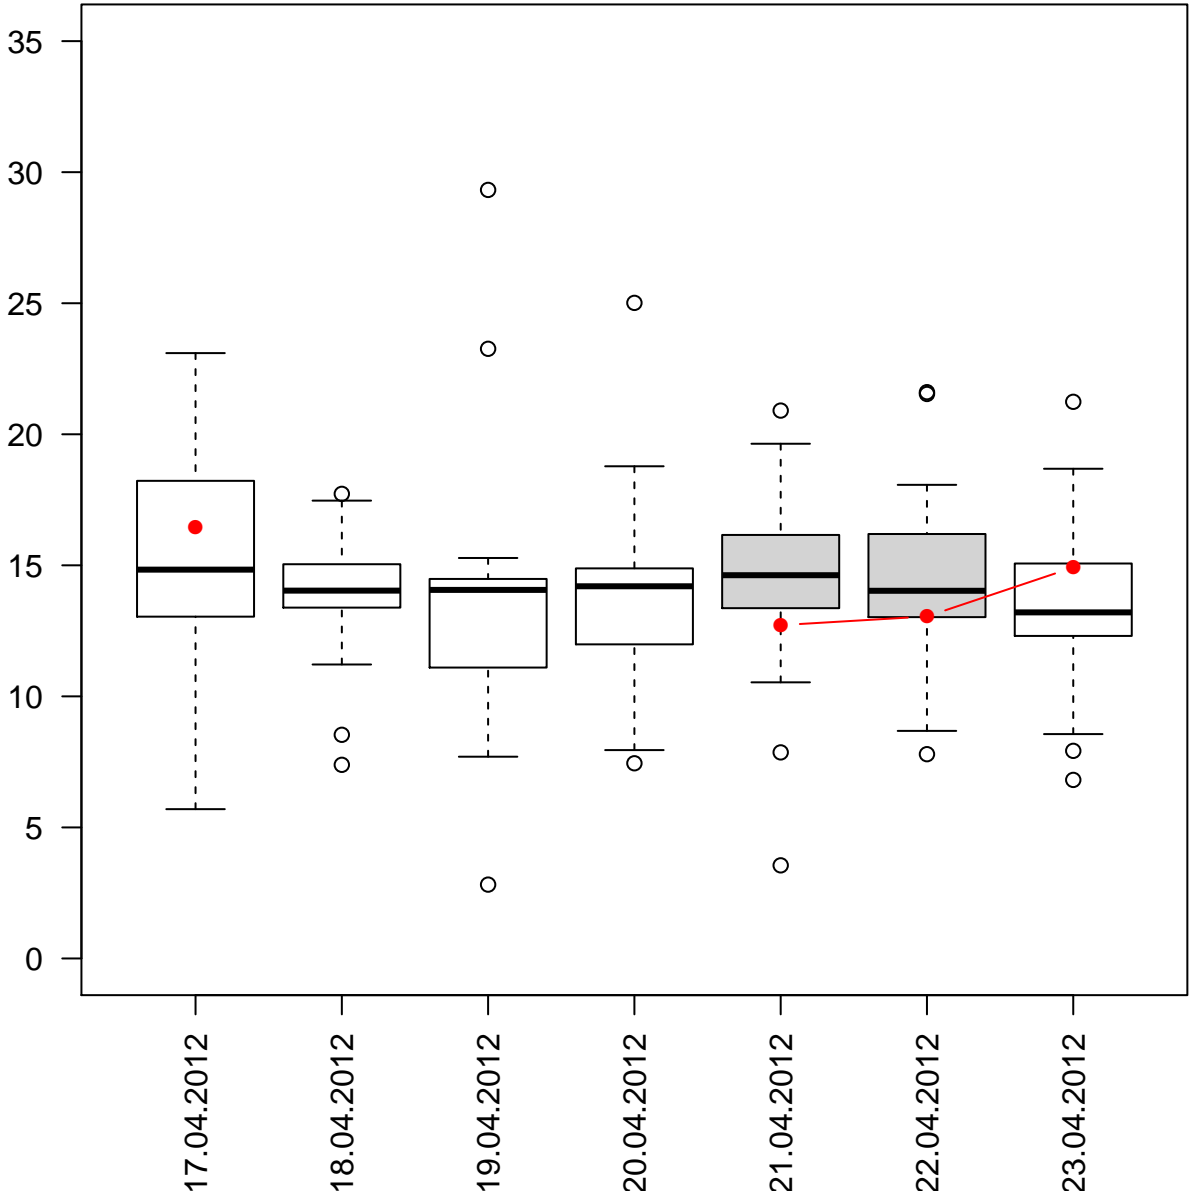

# METH loads % per weekday

Zagreb

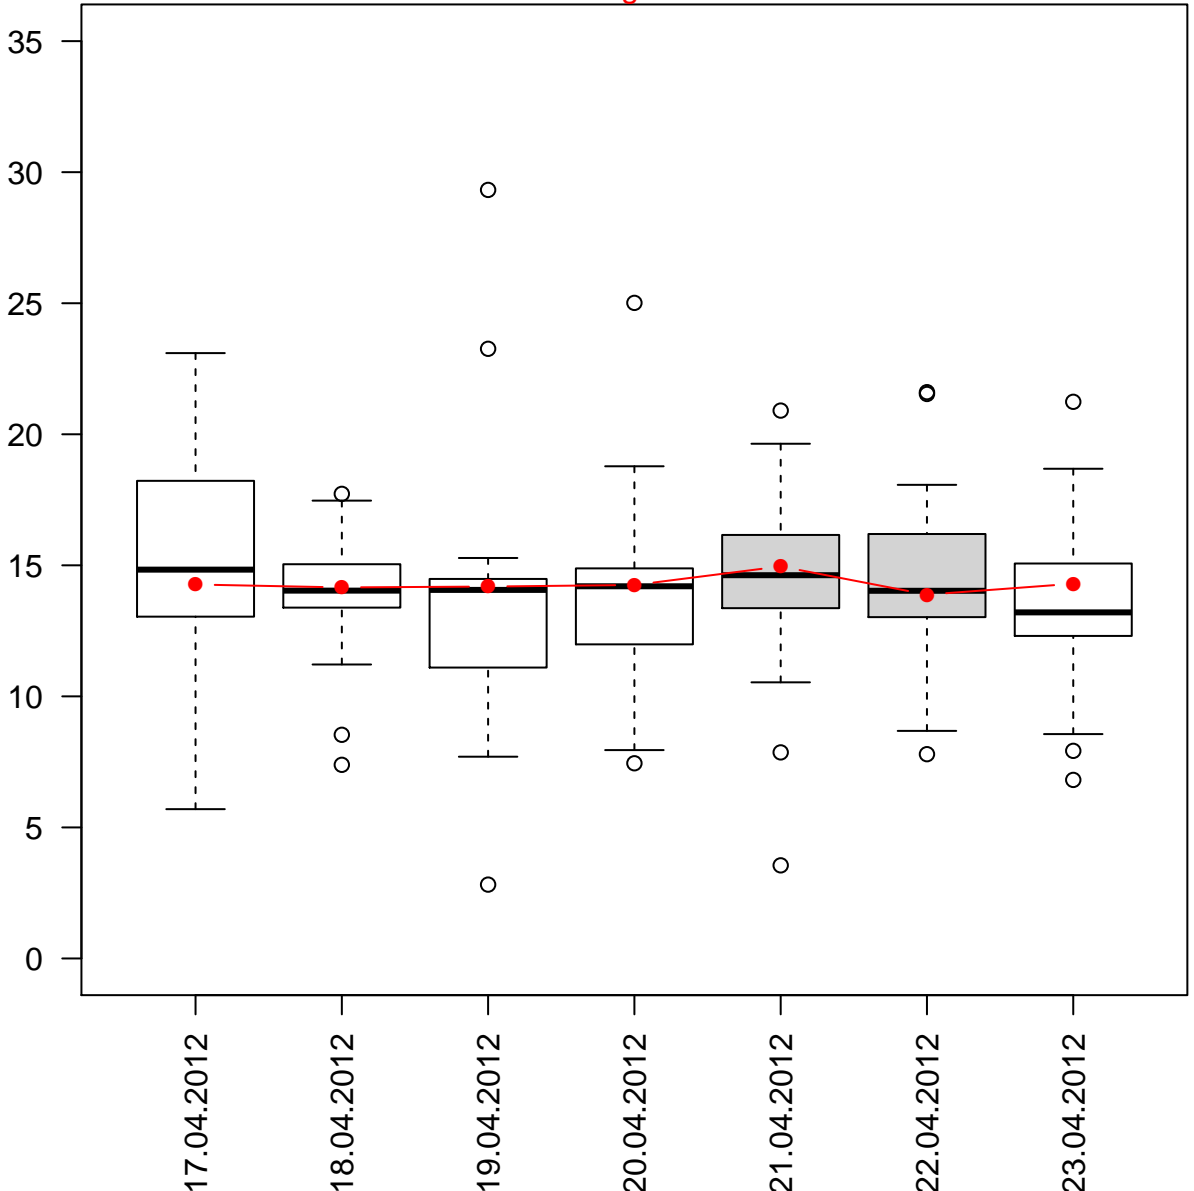

# METH loads % per weekday

Milan

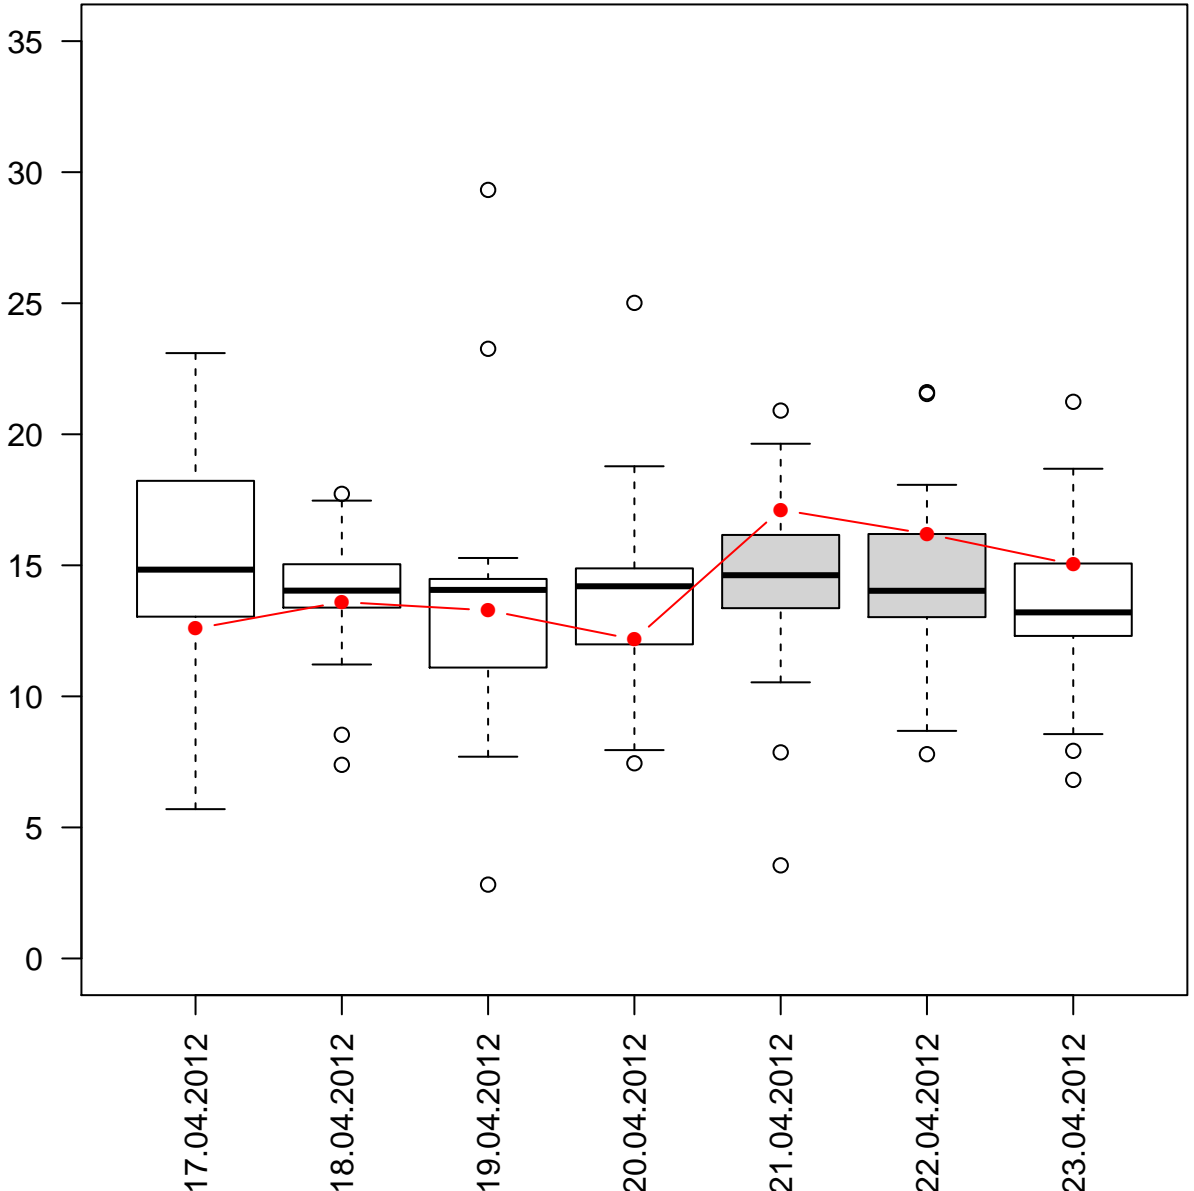

# METH loads % per weekday

Amsterdam

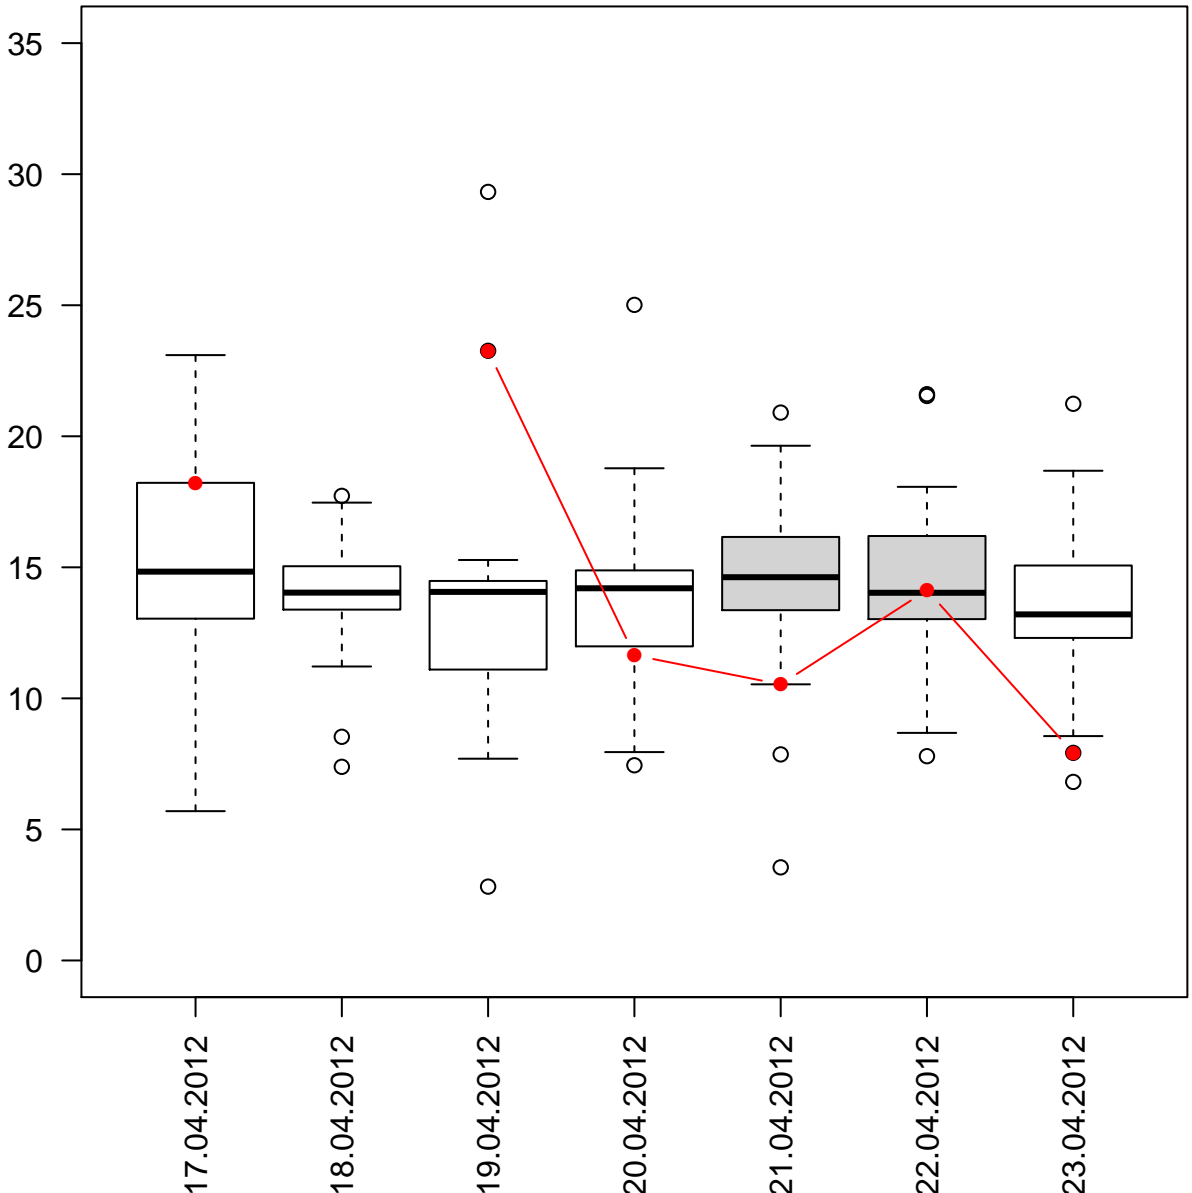

# METH loads % per weekday

Eindhoven

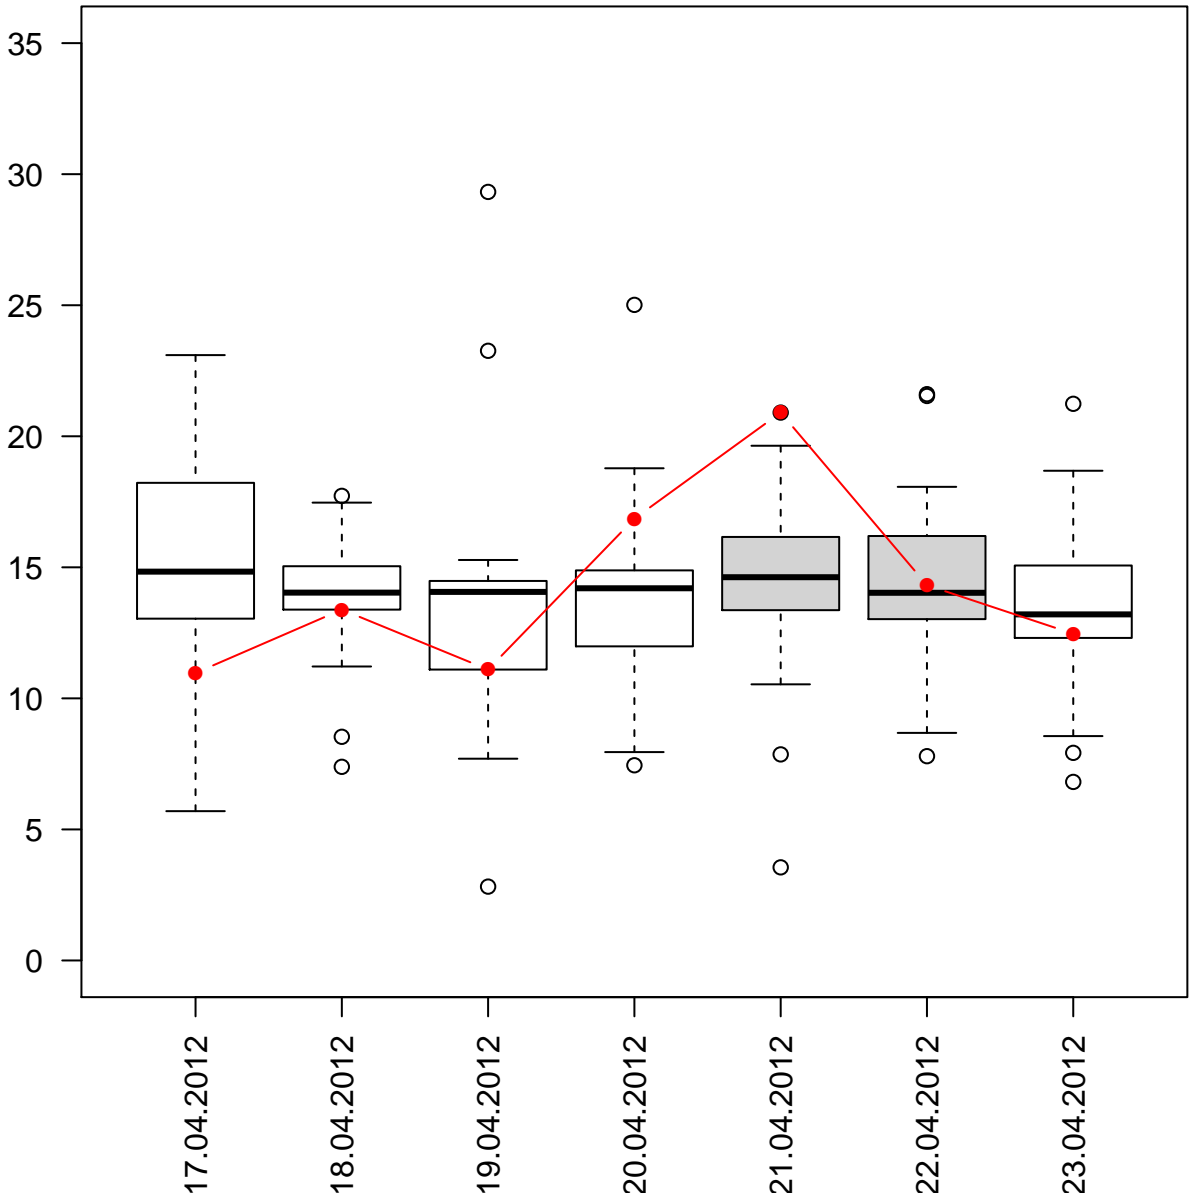

# METH loads % per weekday

Utrecht

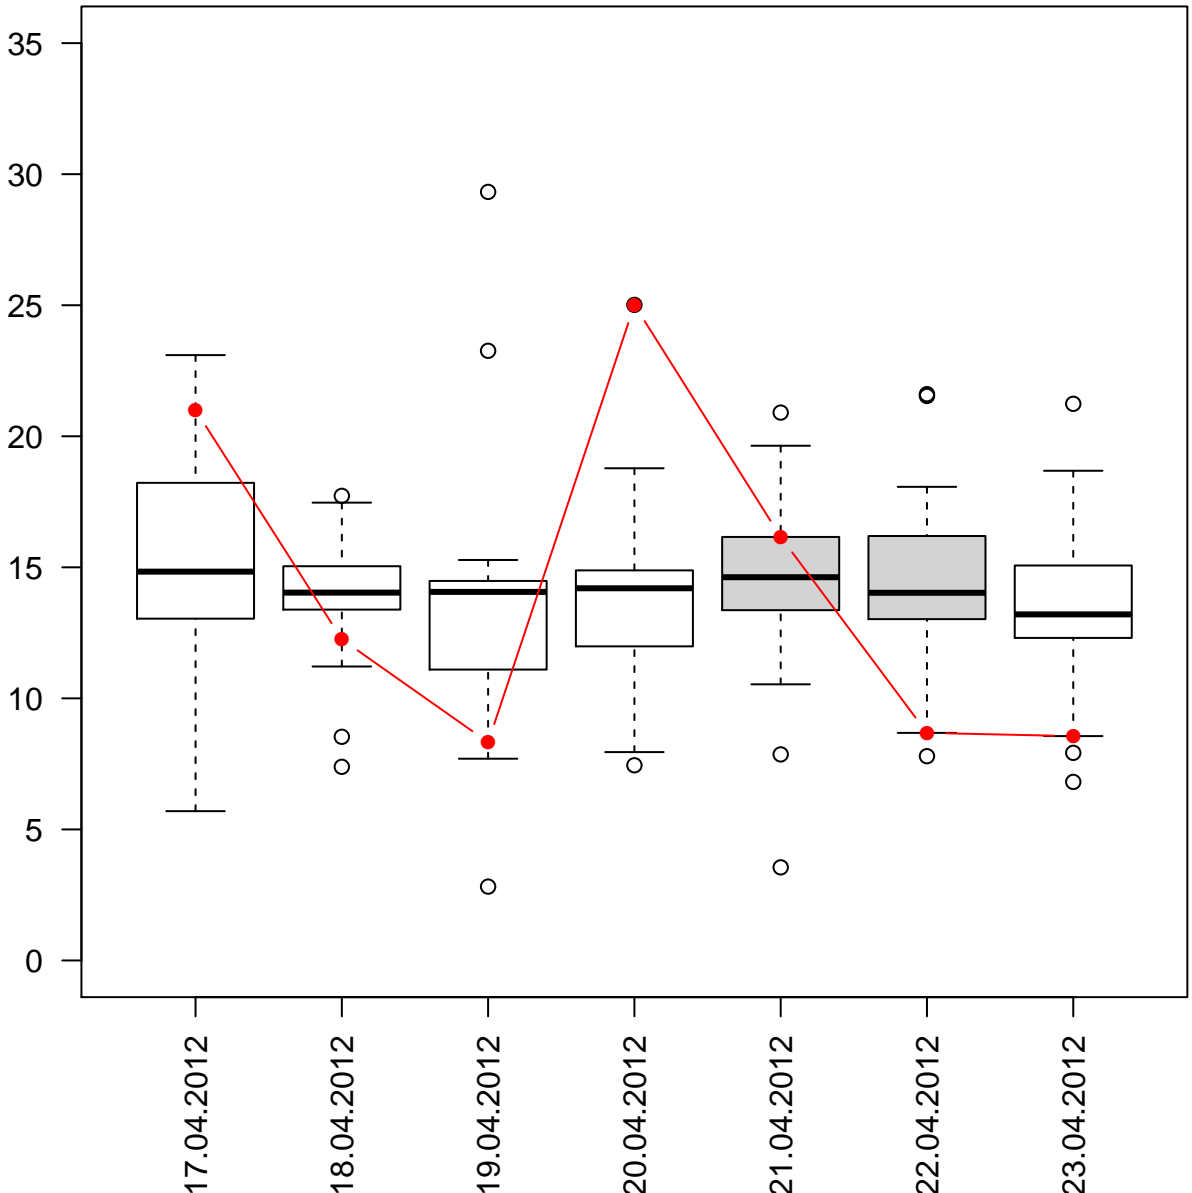

# METH loads % per weekday

Oslo

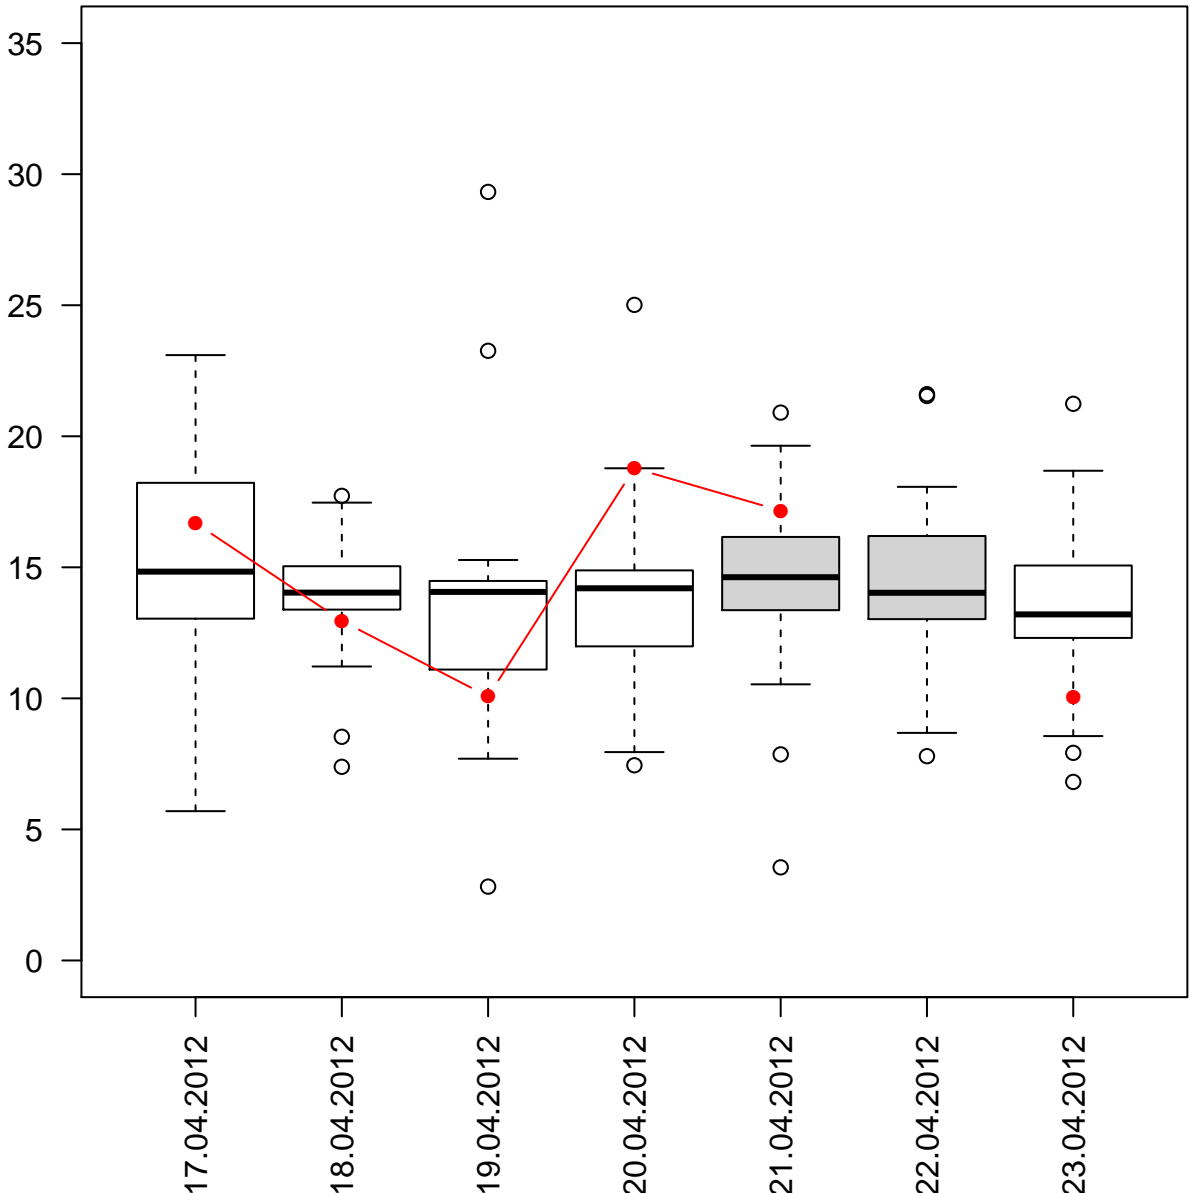



# METH loads % per weekday

Gothenburg

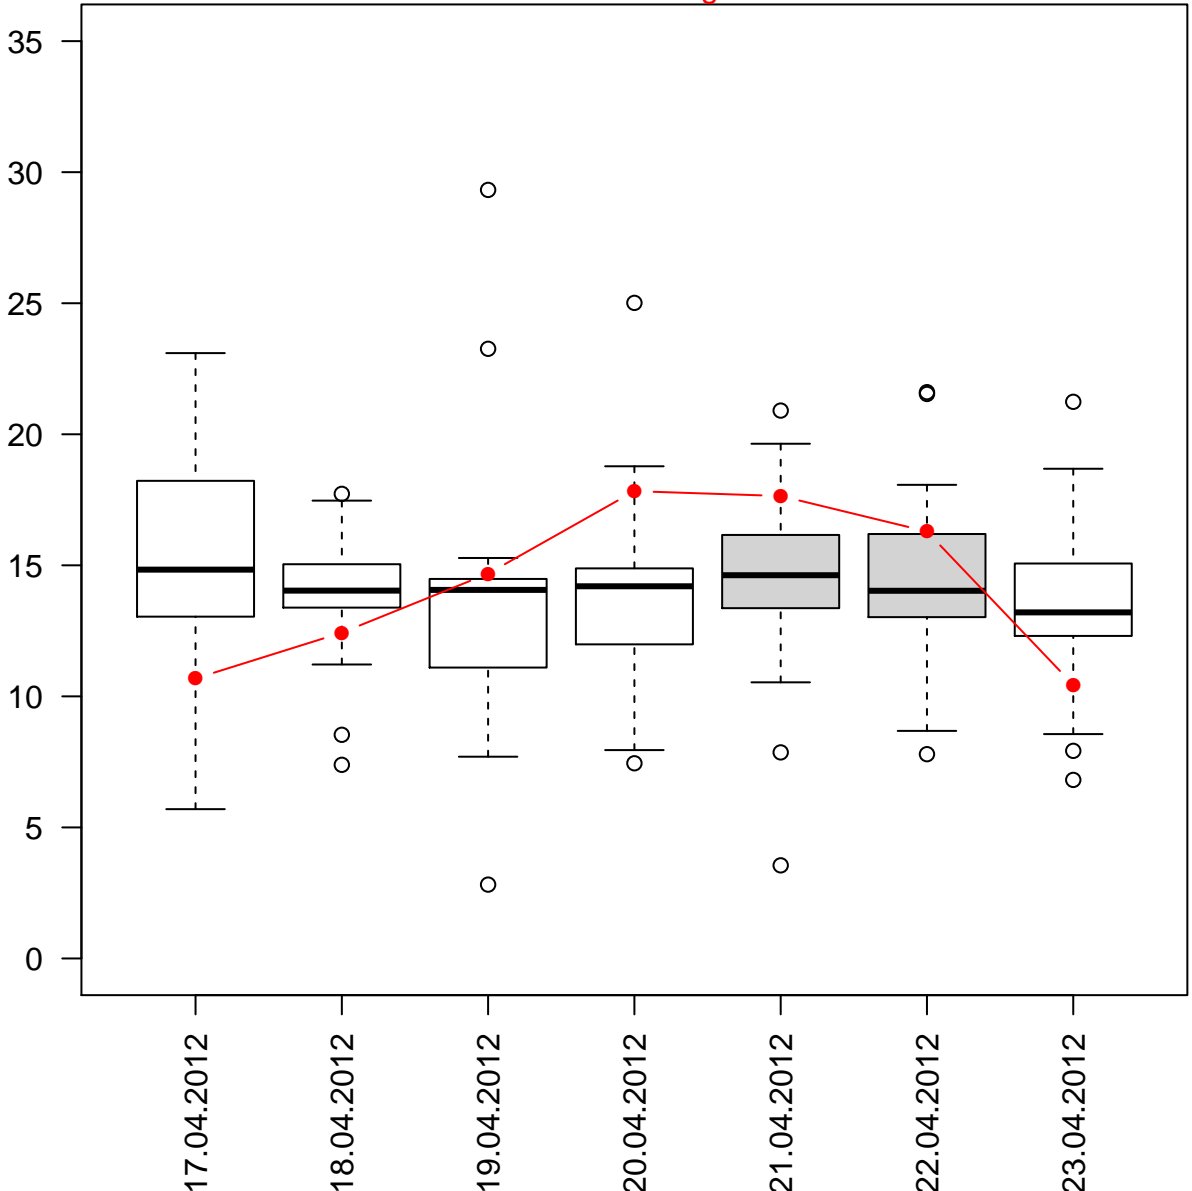

# METH loads % per weekday

Umeå

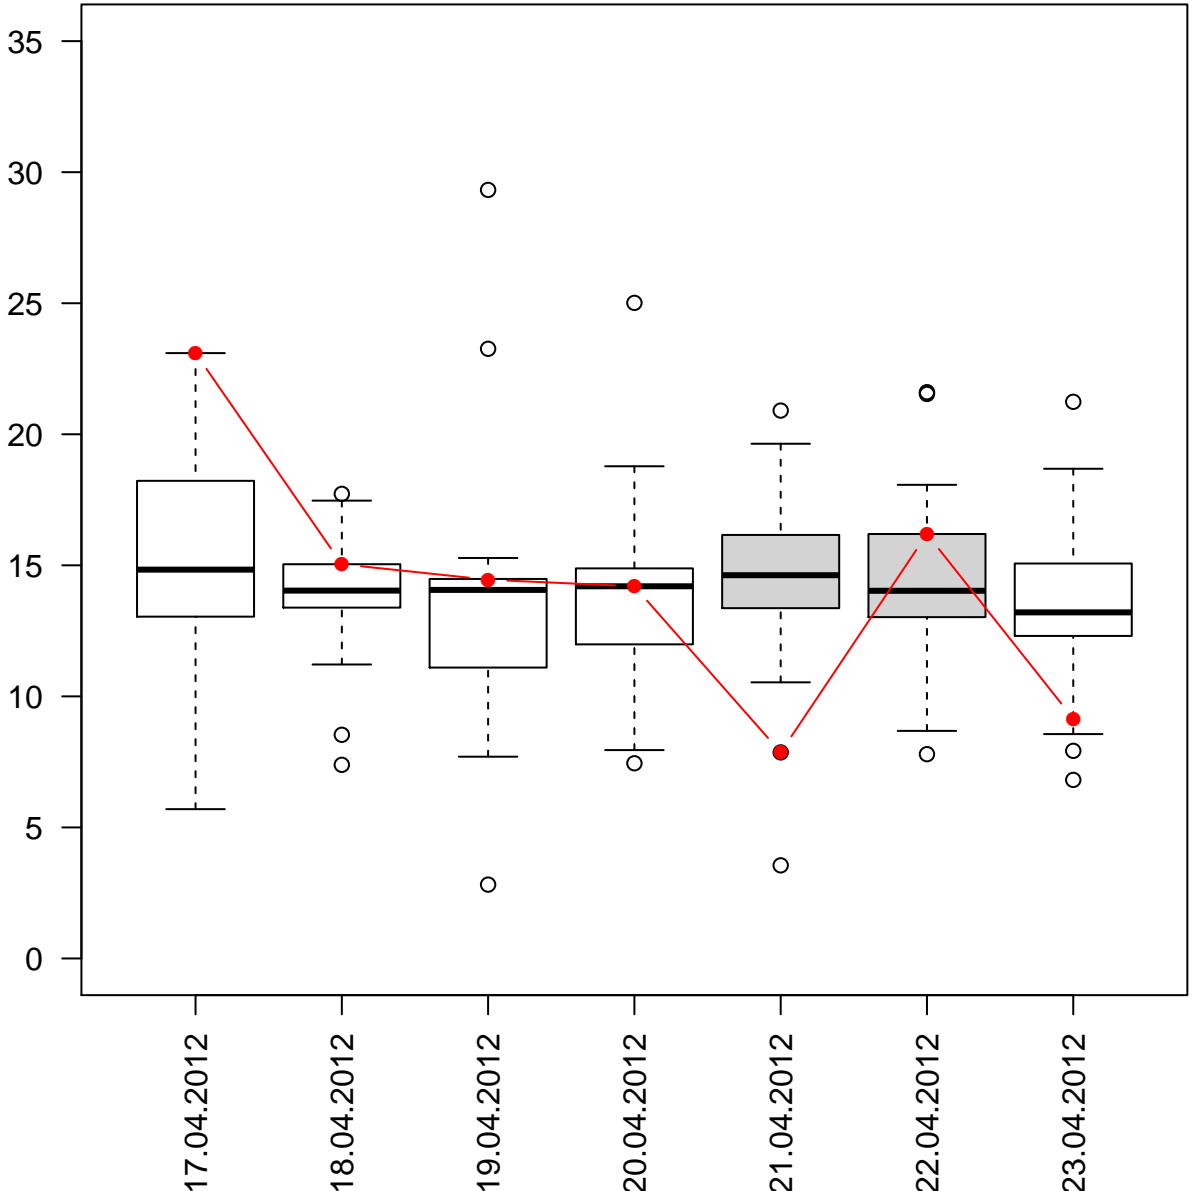

# MDMA loads % per weekday

Antwerp Z.

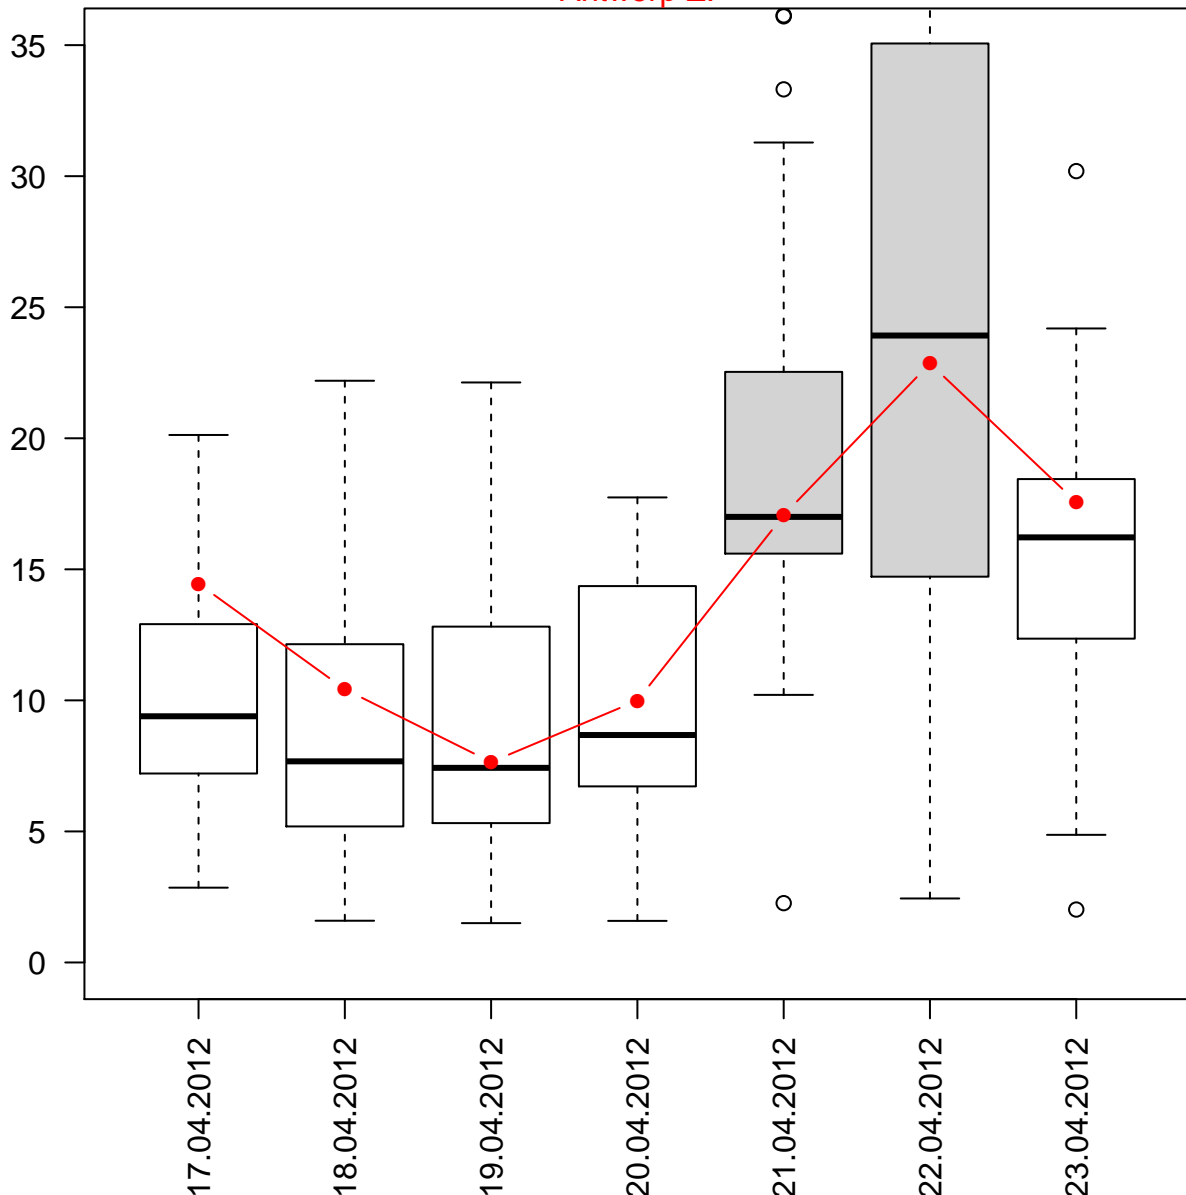

# MDMA loads % per weekday

Antwerp D.

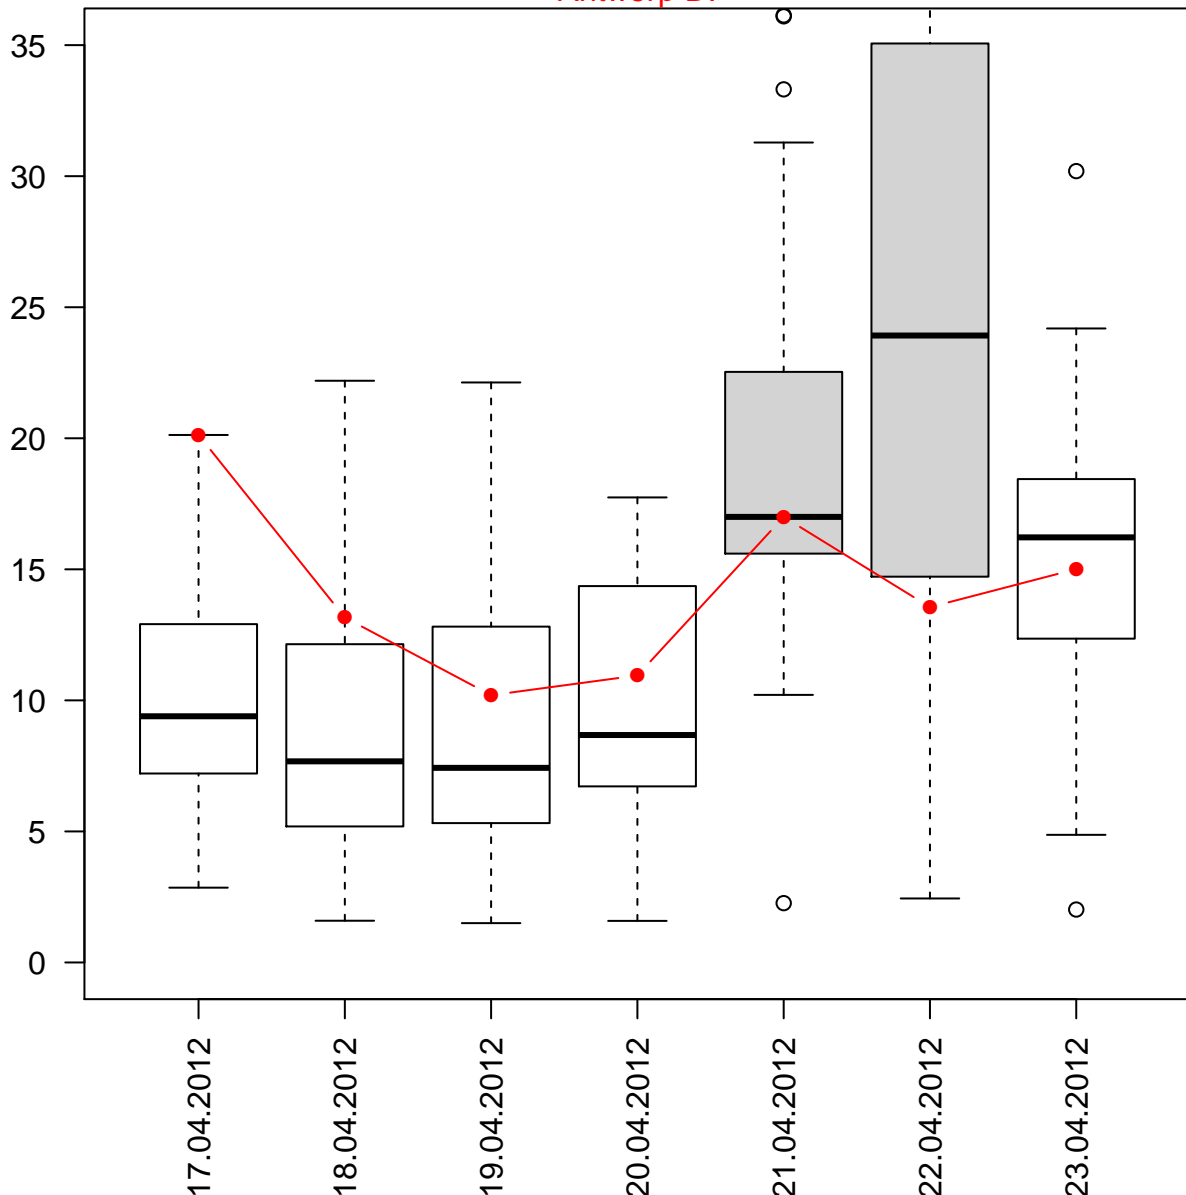

# MDMA loads % per weekday

Brussels

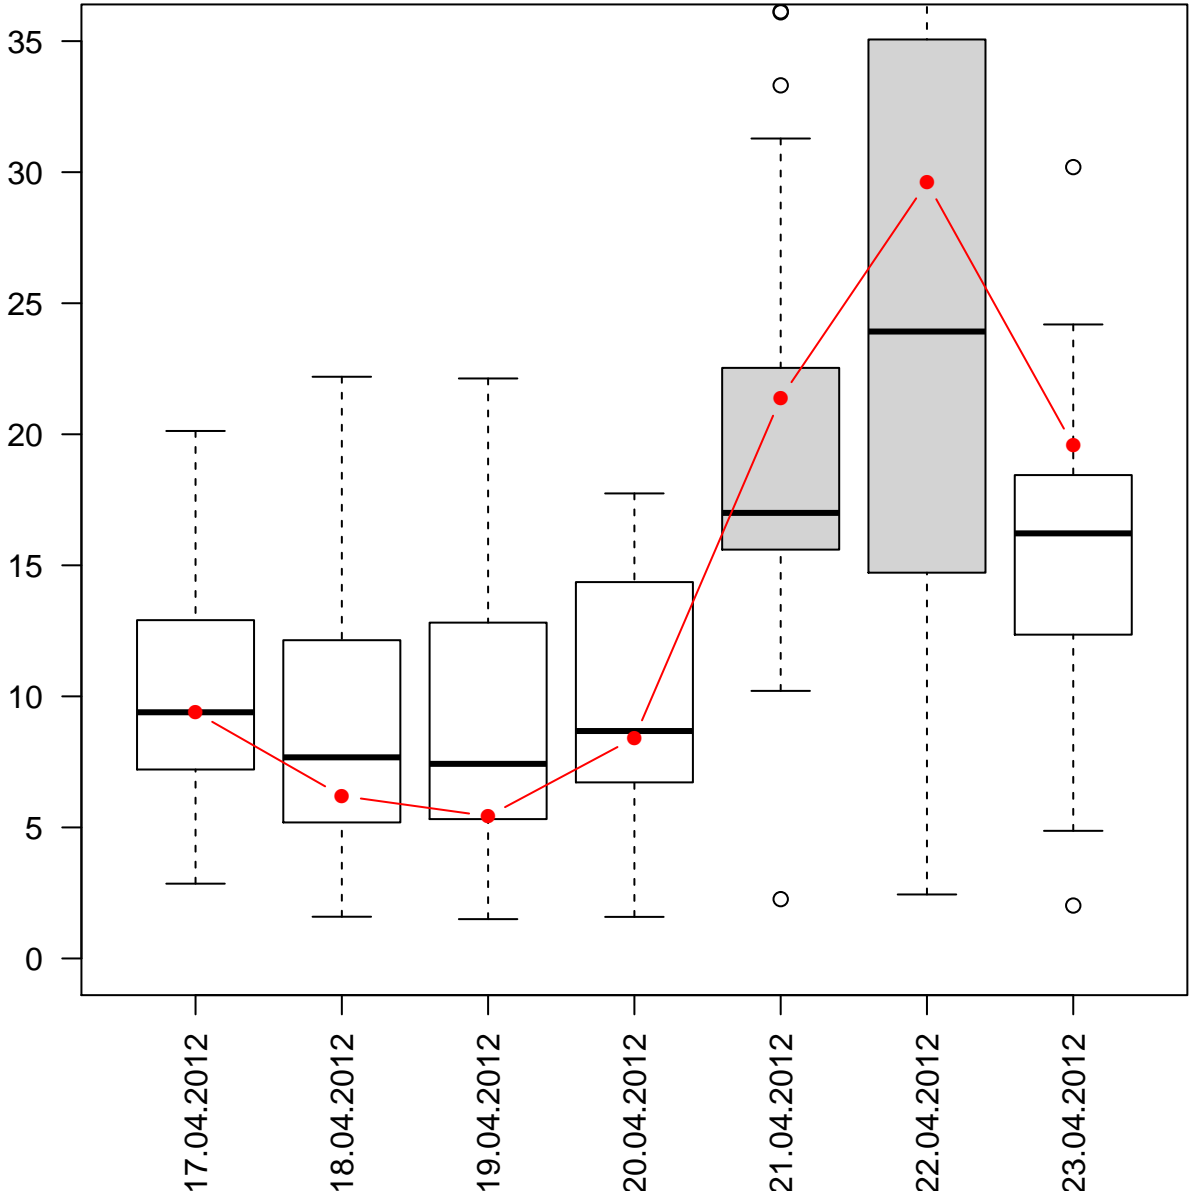

# MDMA loads % per weekday

Basel

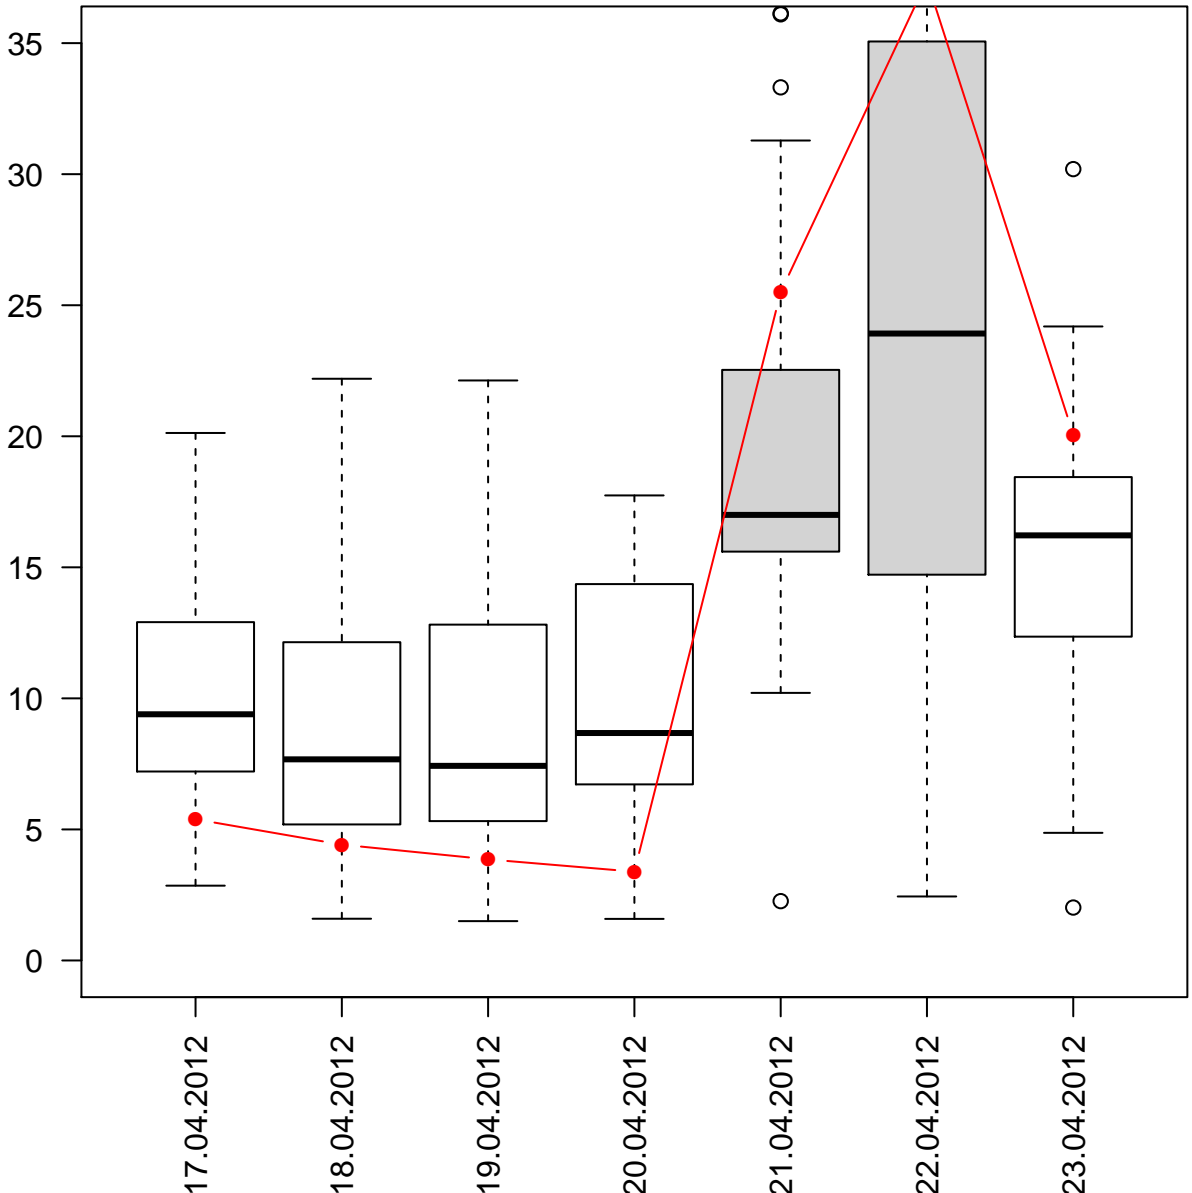

# MDMA loads % per weekday

Berne

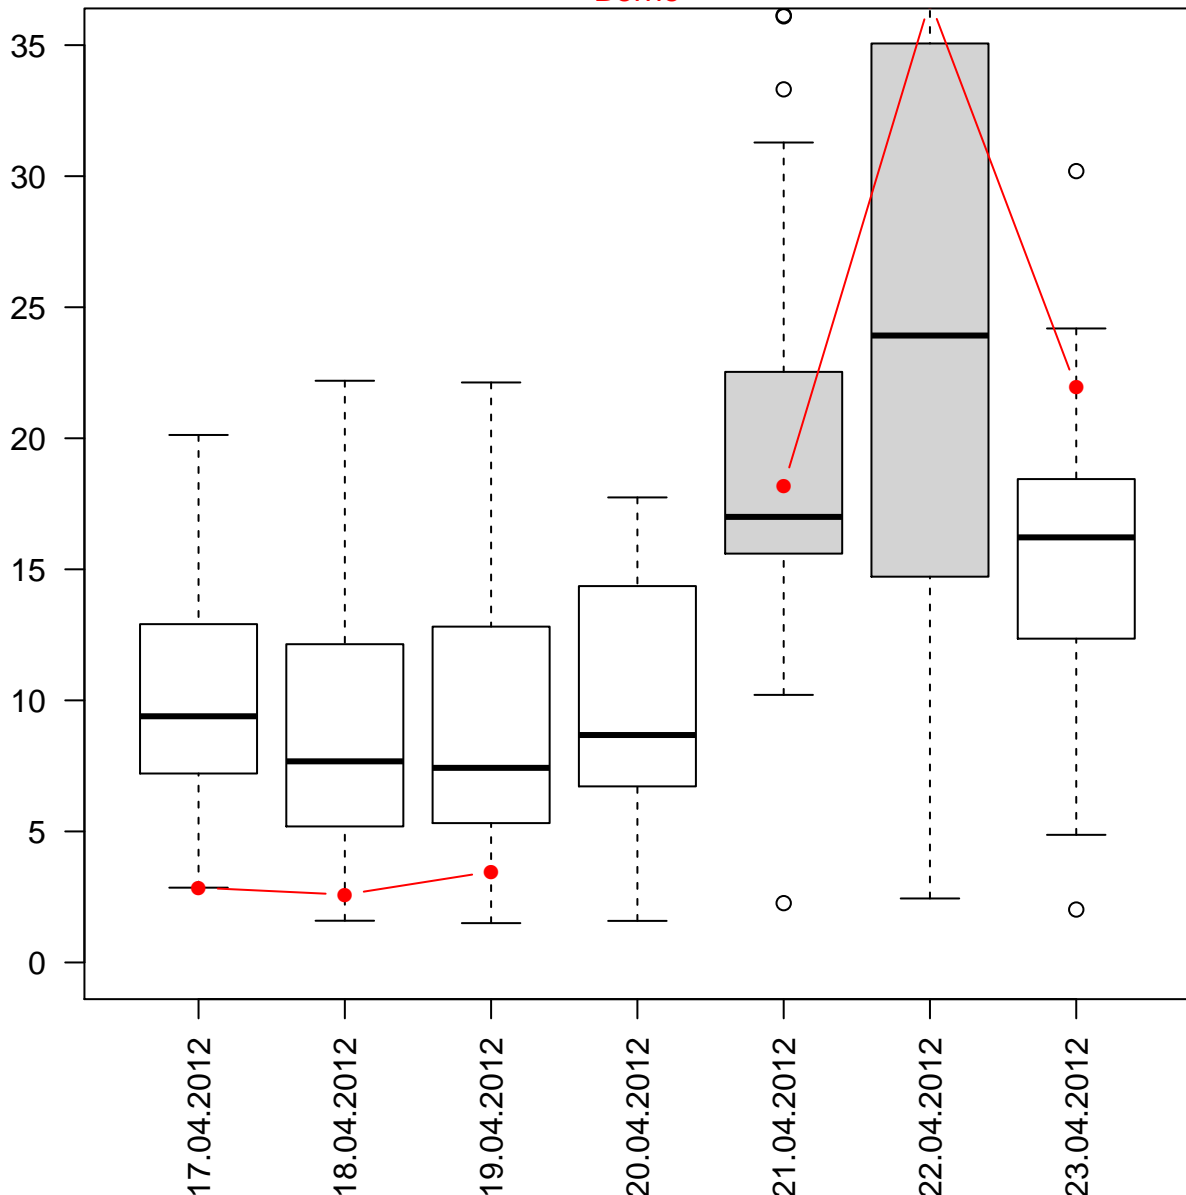

# MDMA loads % per weekday

Geneva

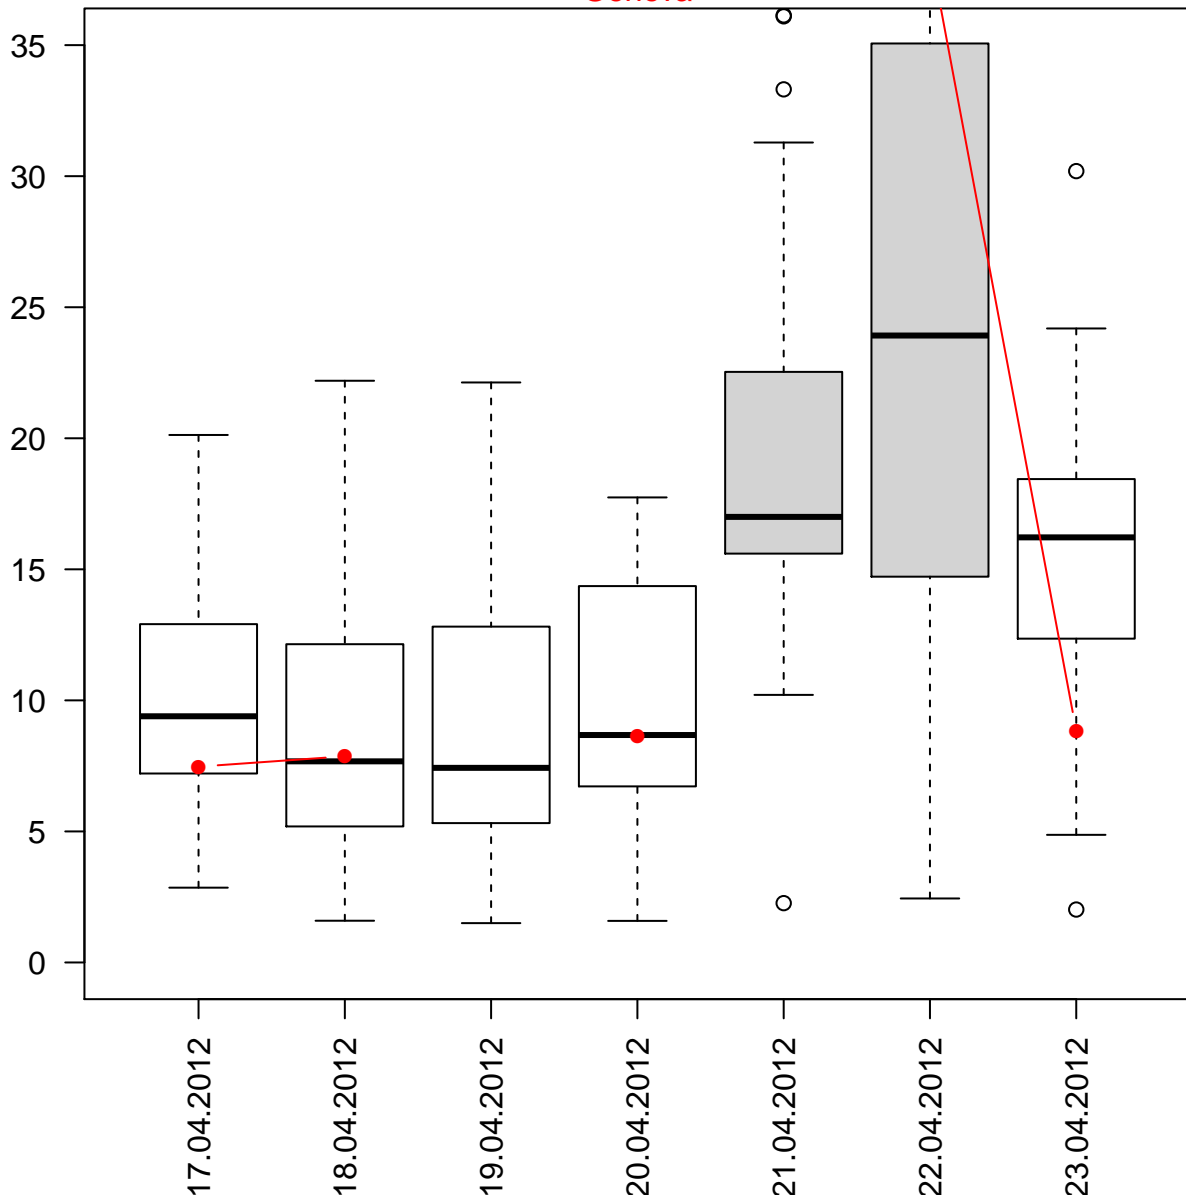



# MDMA loads % per weekday

St.Gallen A.

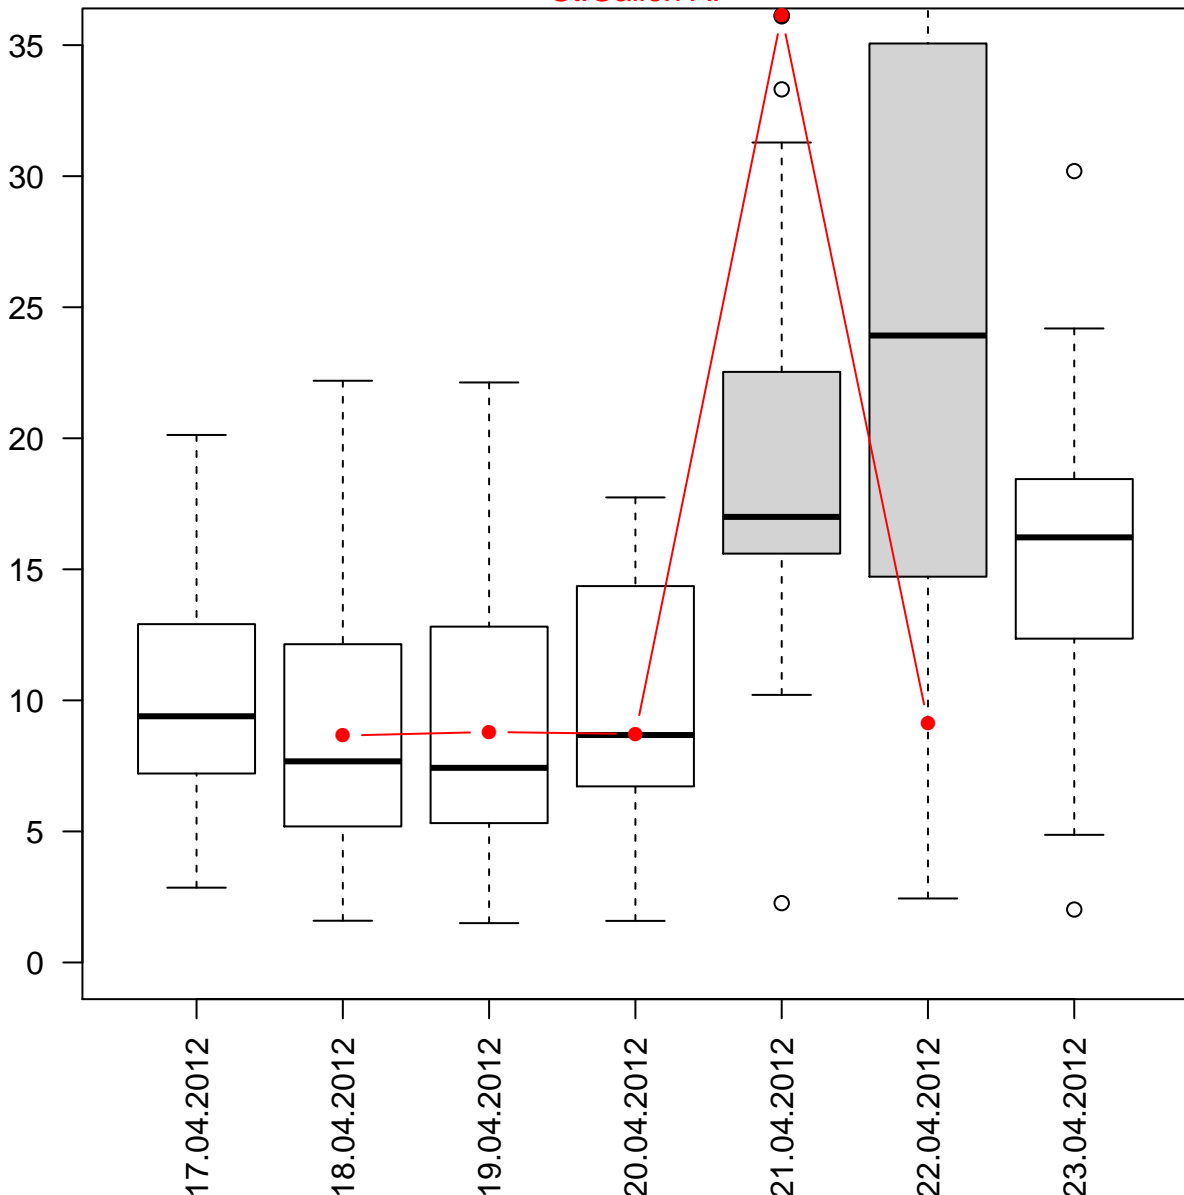

# MDMA loads % per weekday

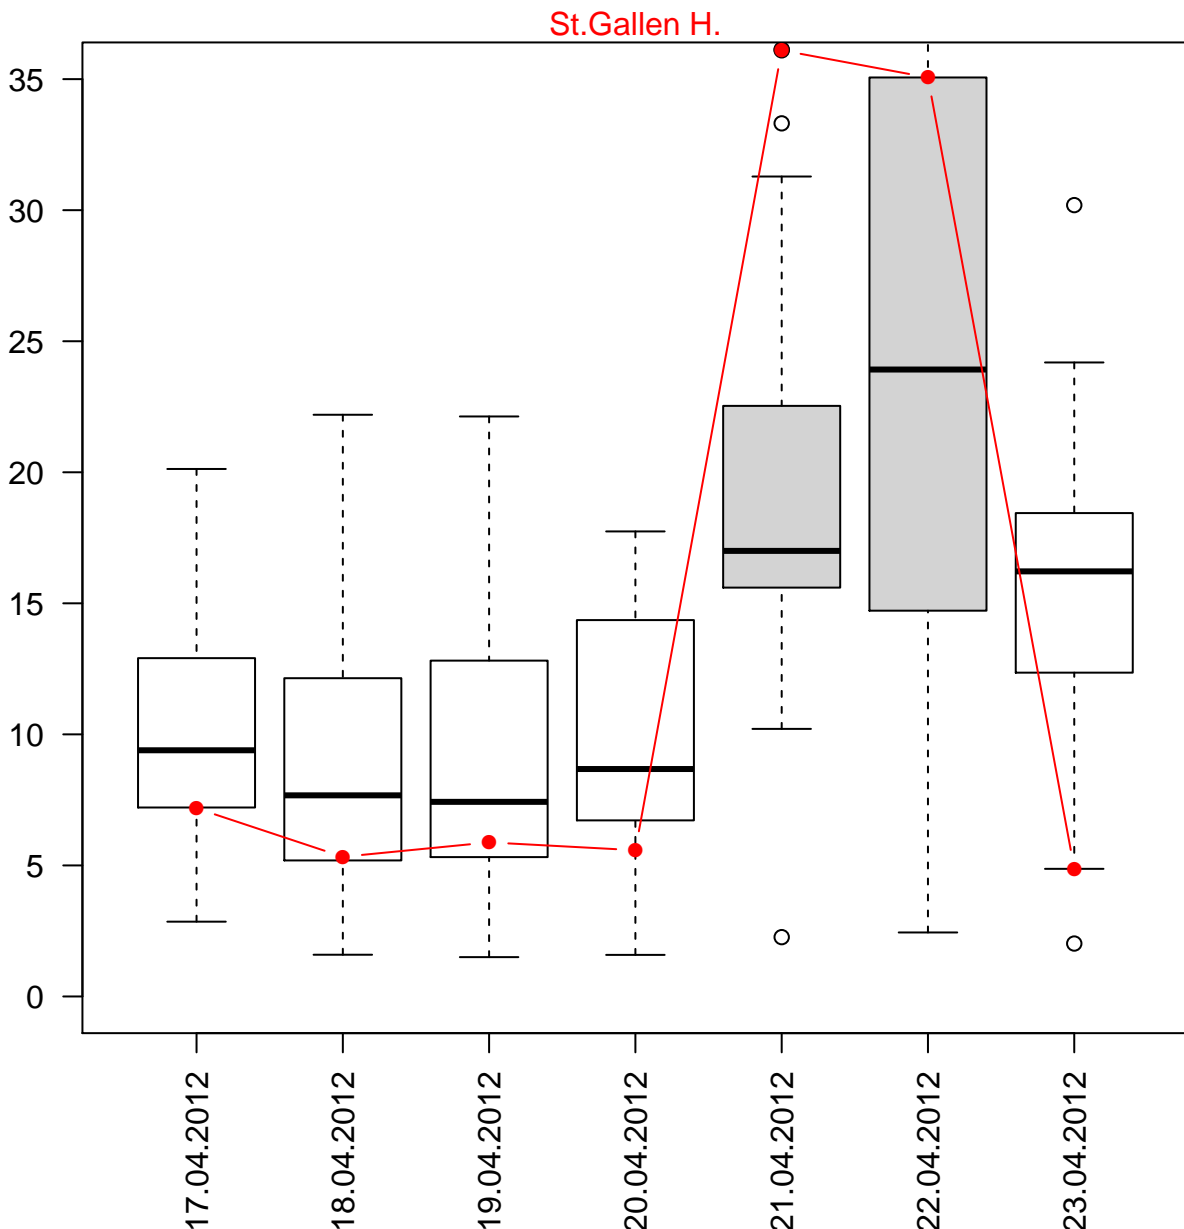

# MDMA loads % per weekday

Zurich

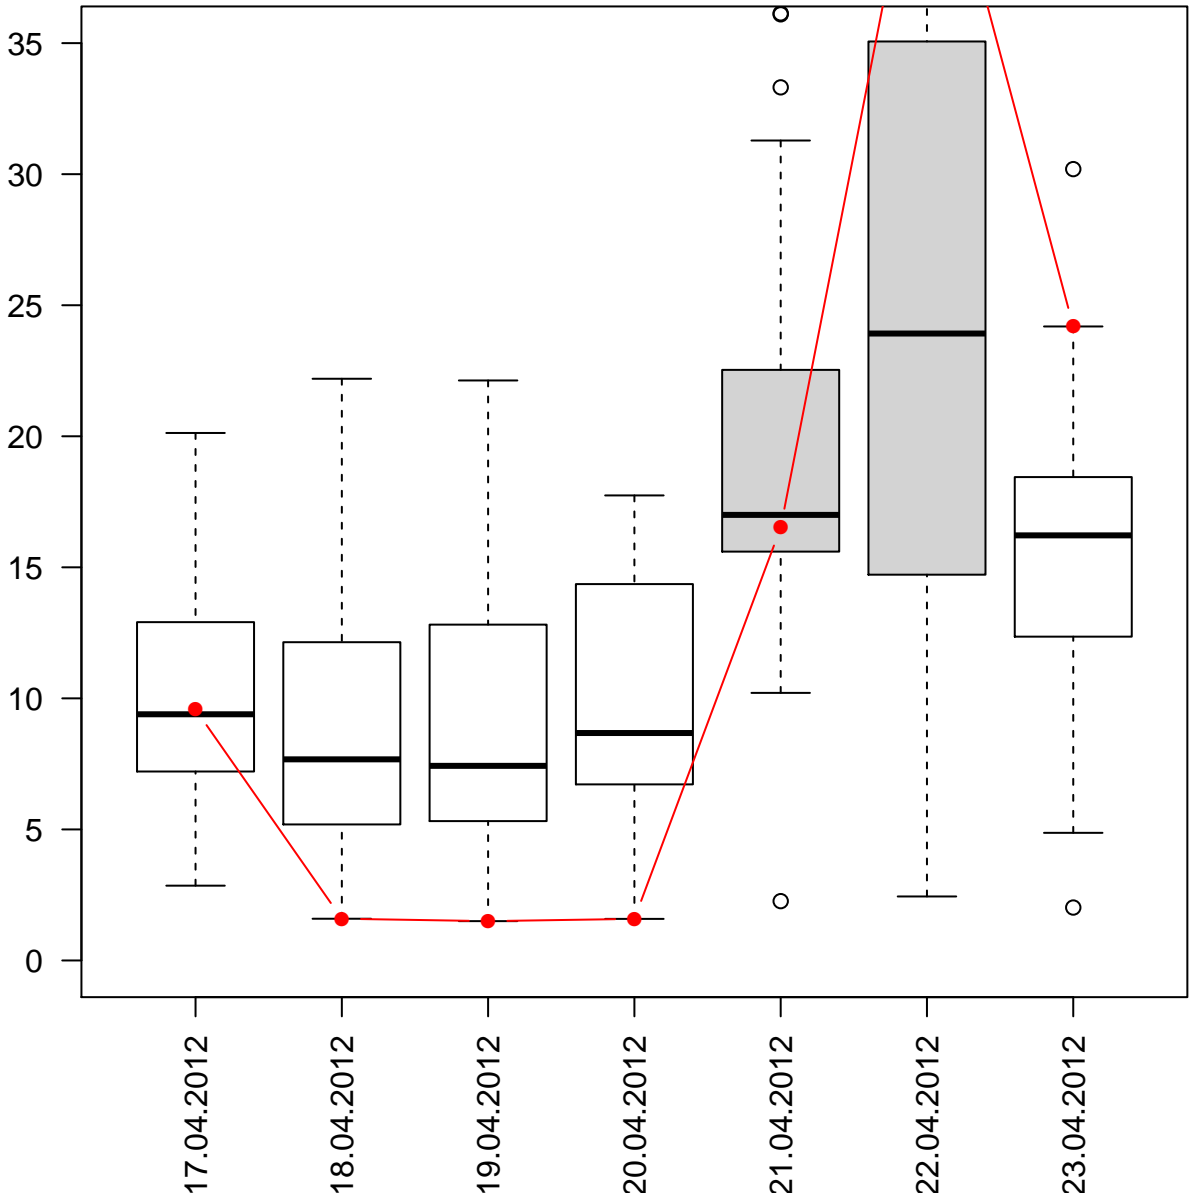

# MDMA loads % per weekday

Budweis

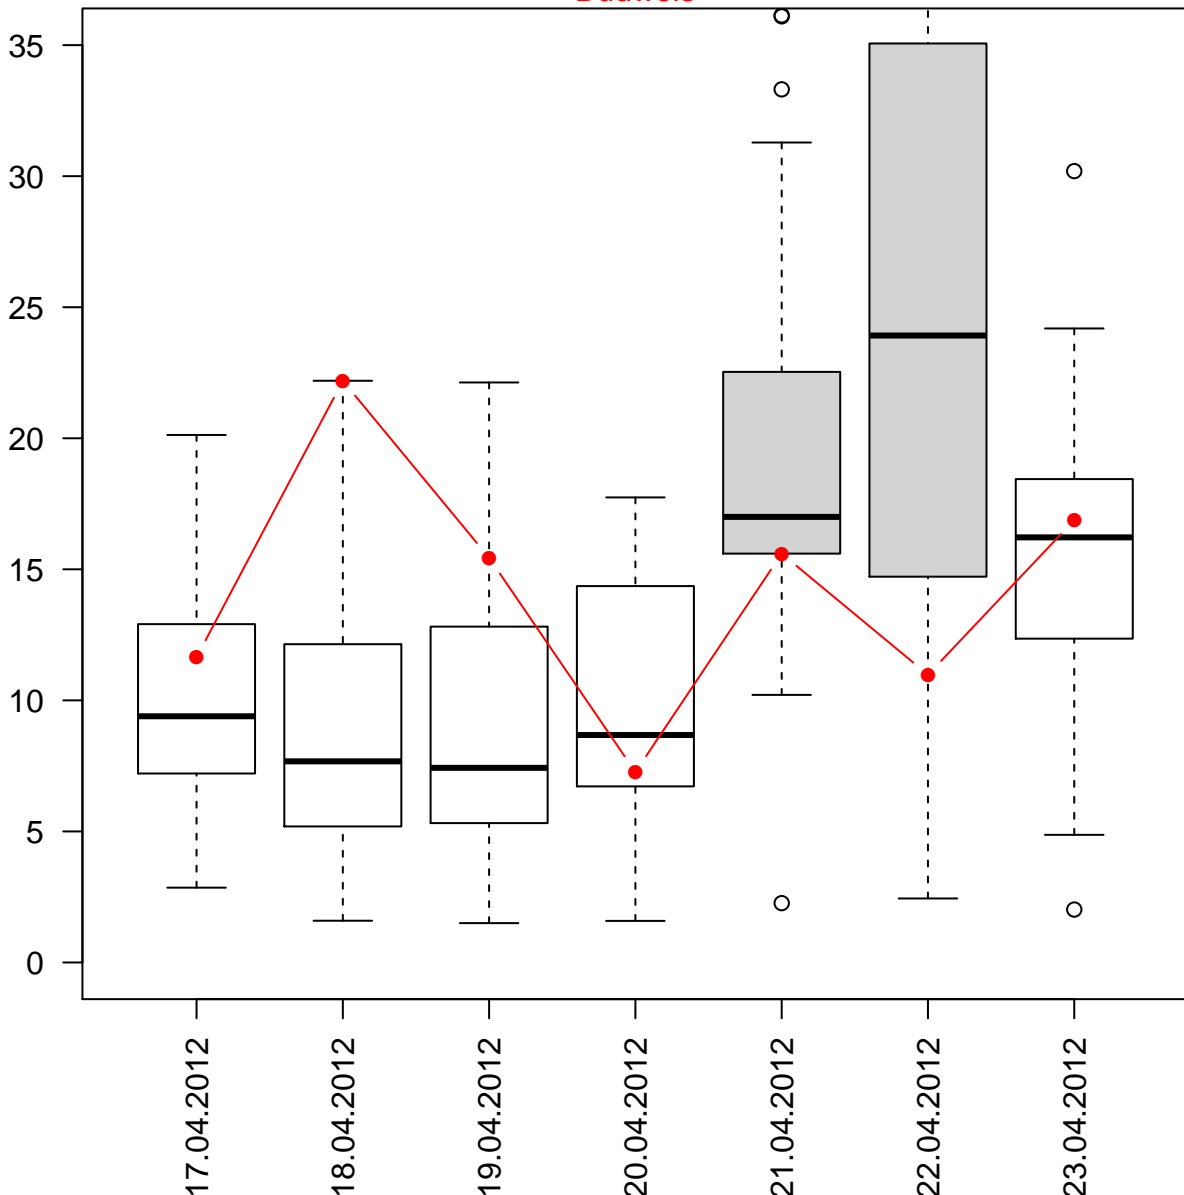

# MDMA loads % per weekday

Prague

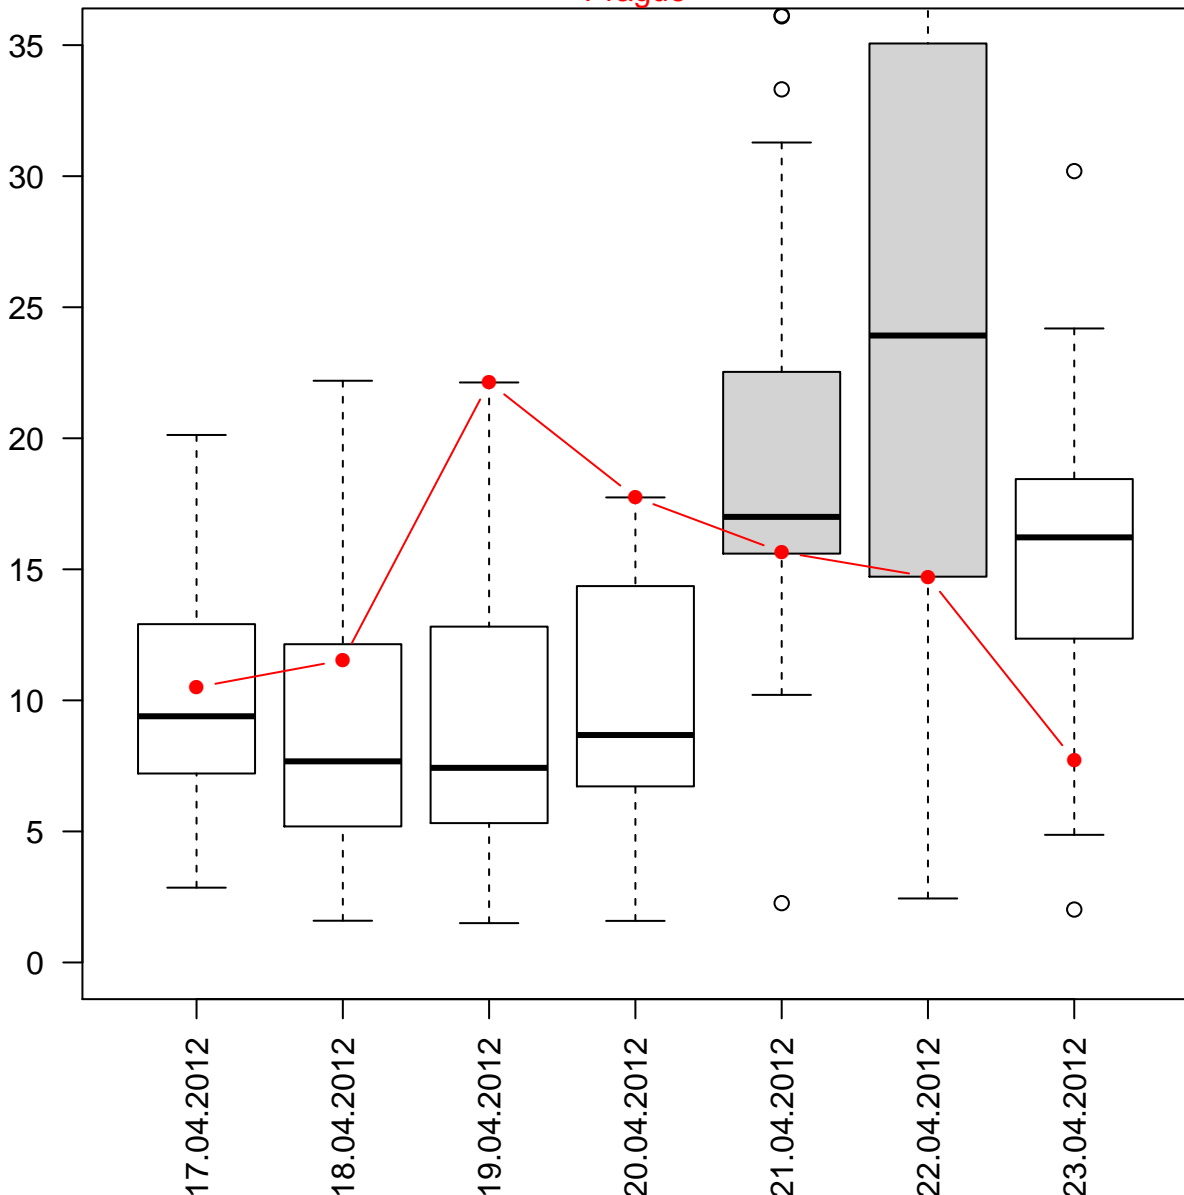

# MDMA loads % per weekday

Castellon

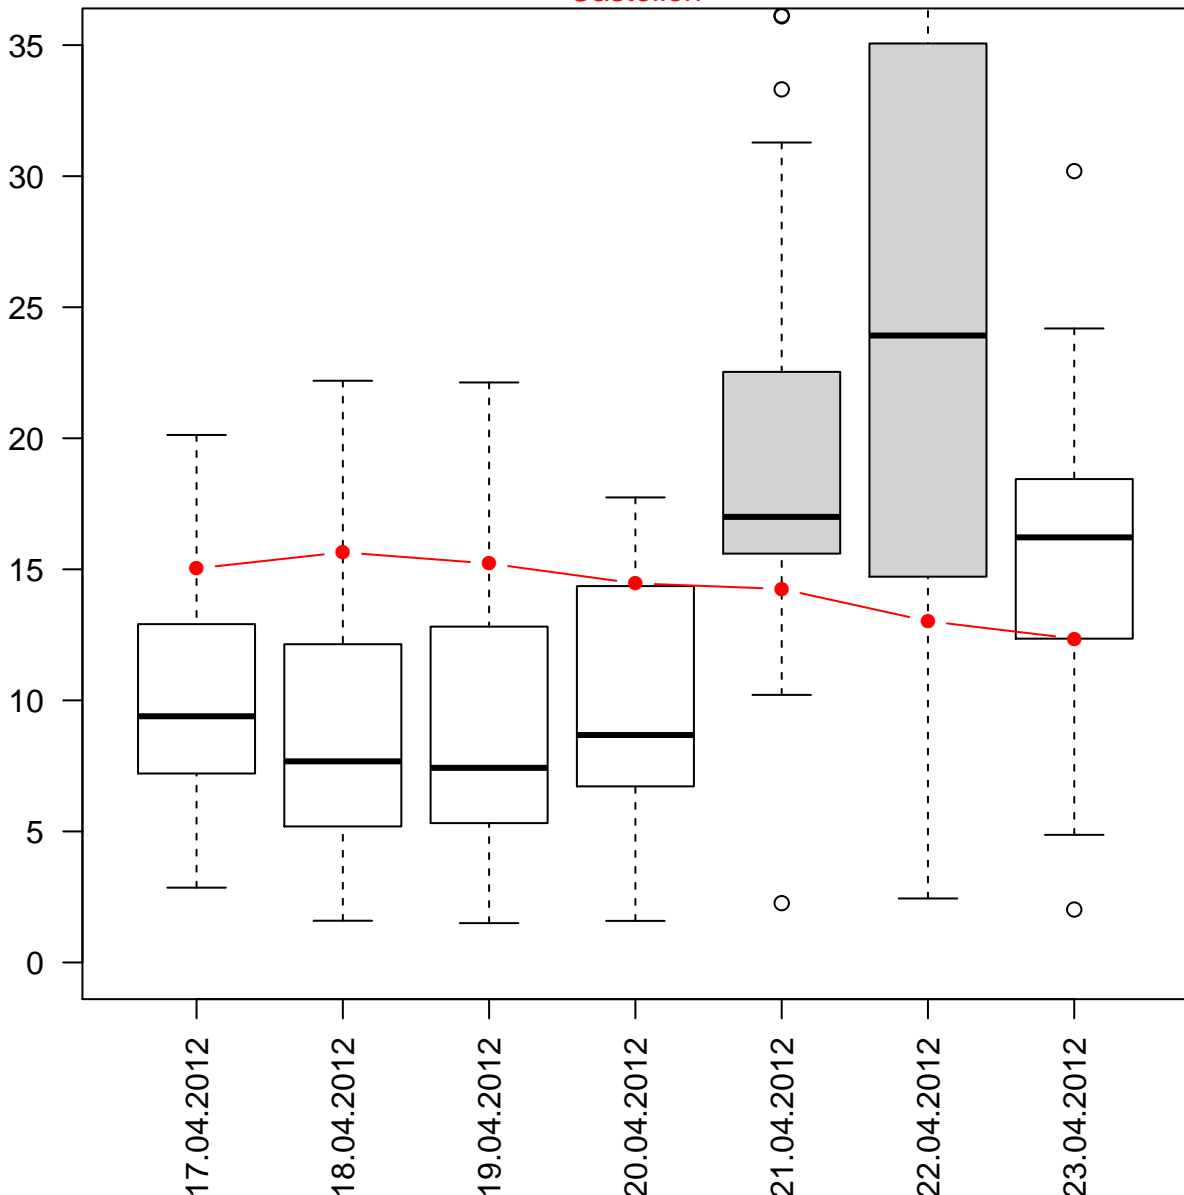

# MDMA loads % per weekday

Santiago

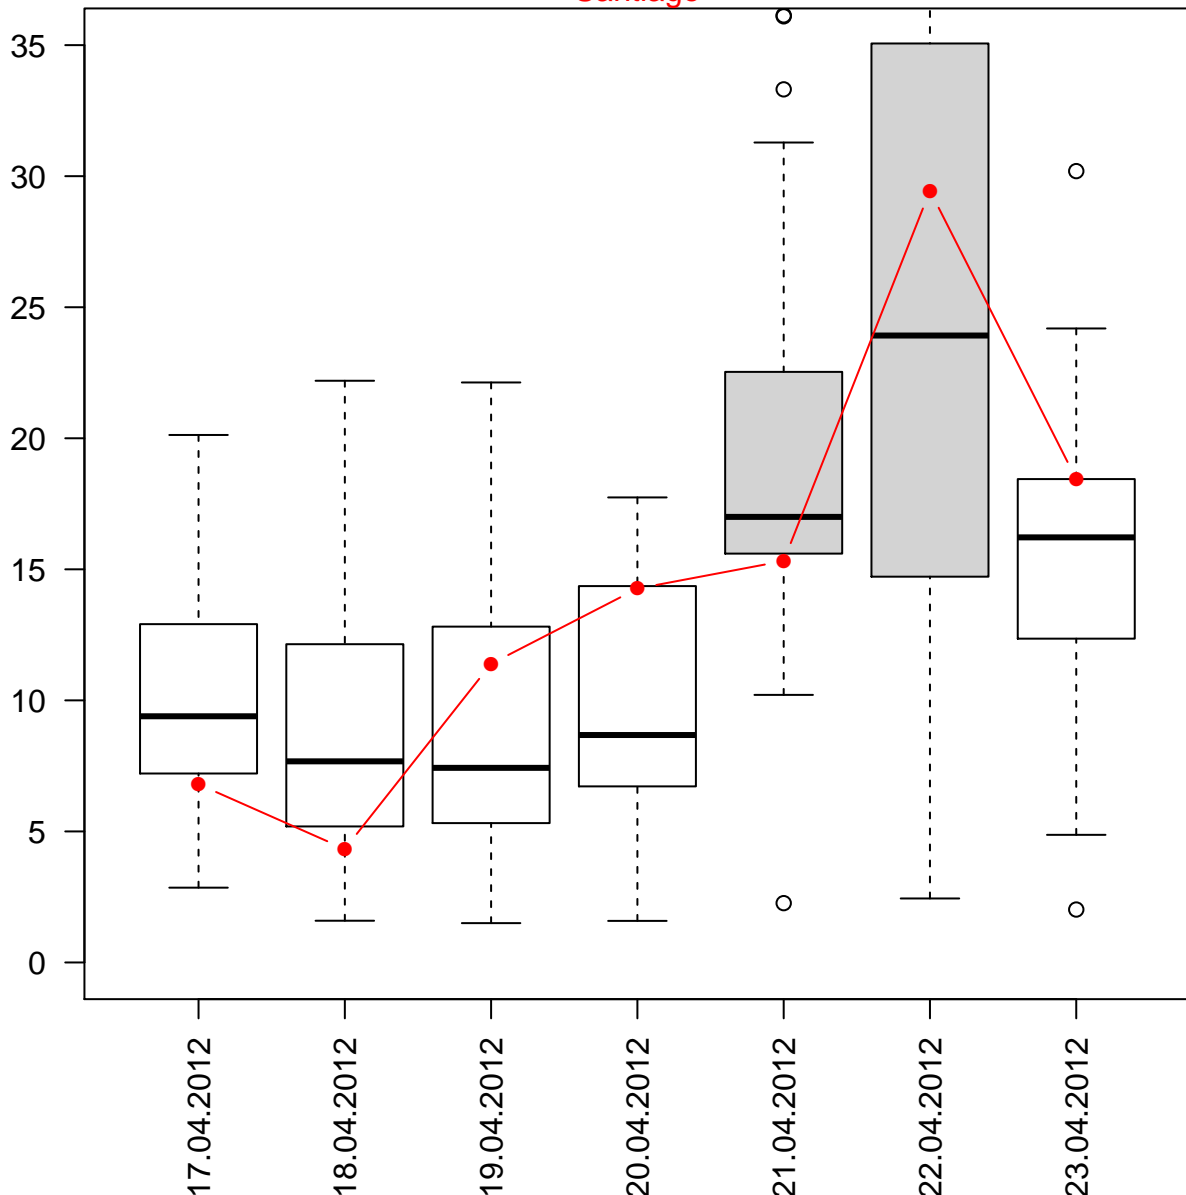

# MDMA loads % per weekday

Barcelona

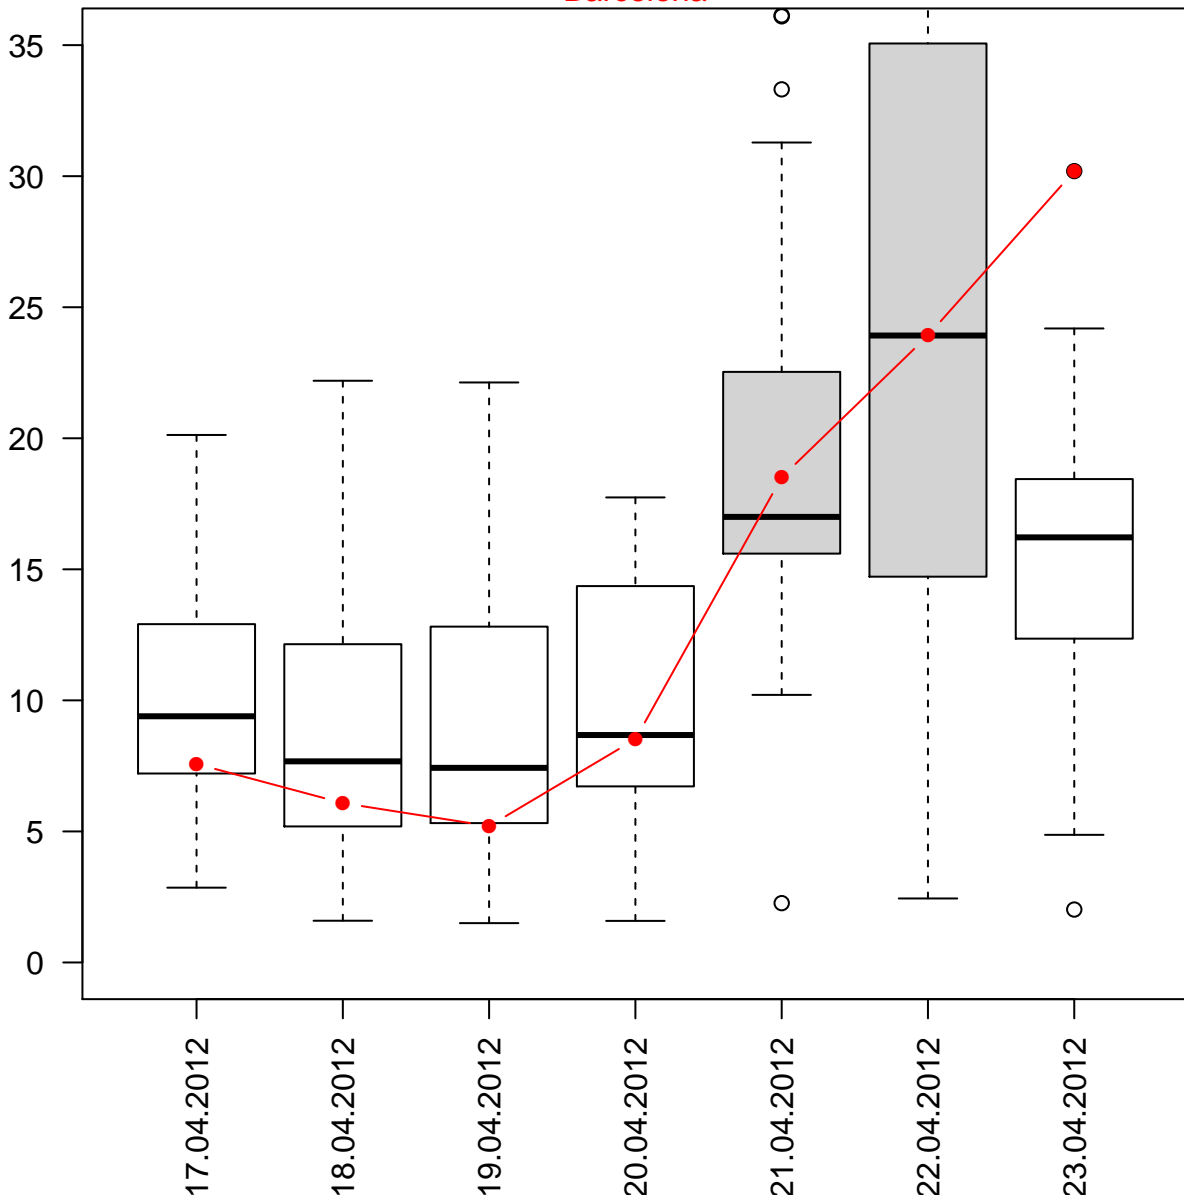



# MDMA loads % per weekday

Helsinki

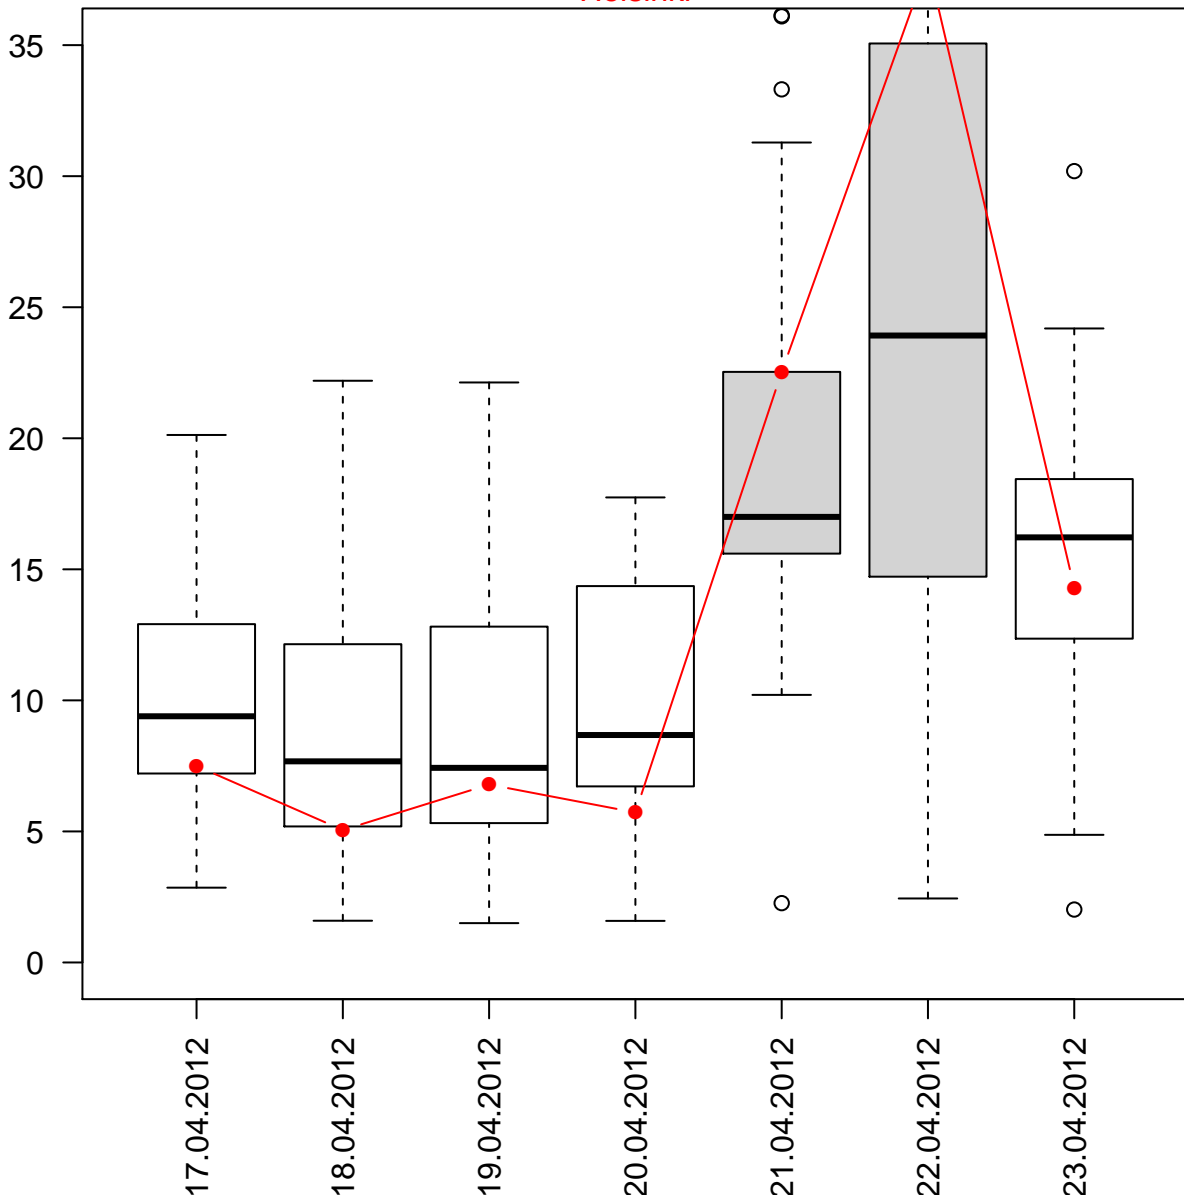

# MDMA loads % per weekday

Turku

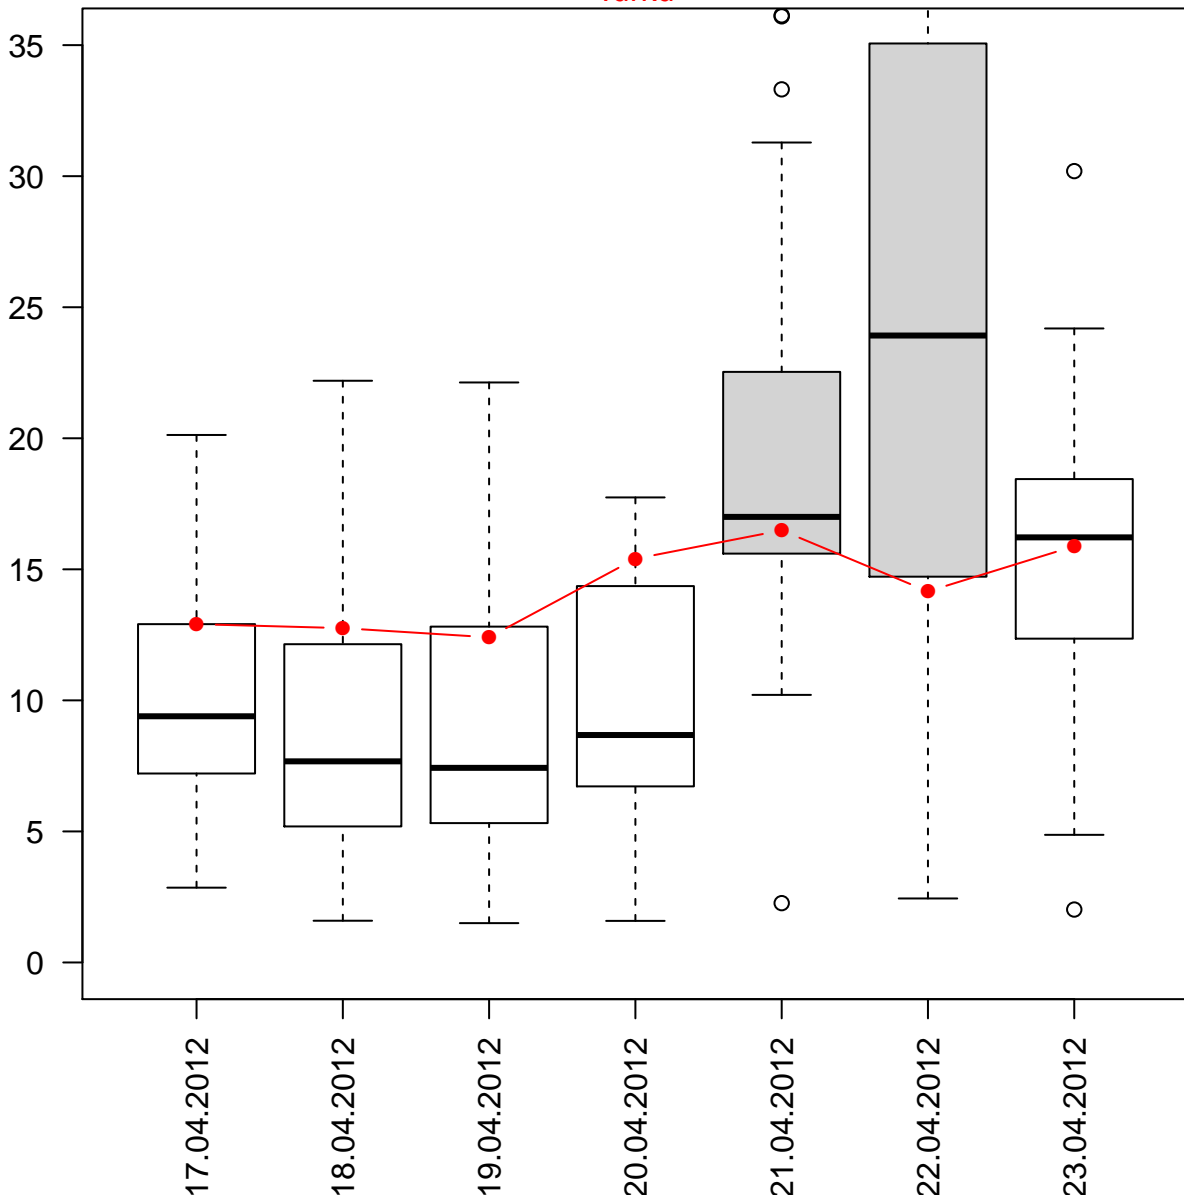

# MDMA loads % per weekday

Paris

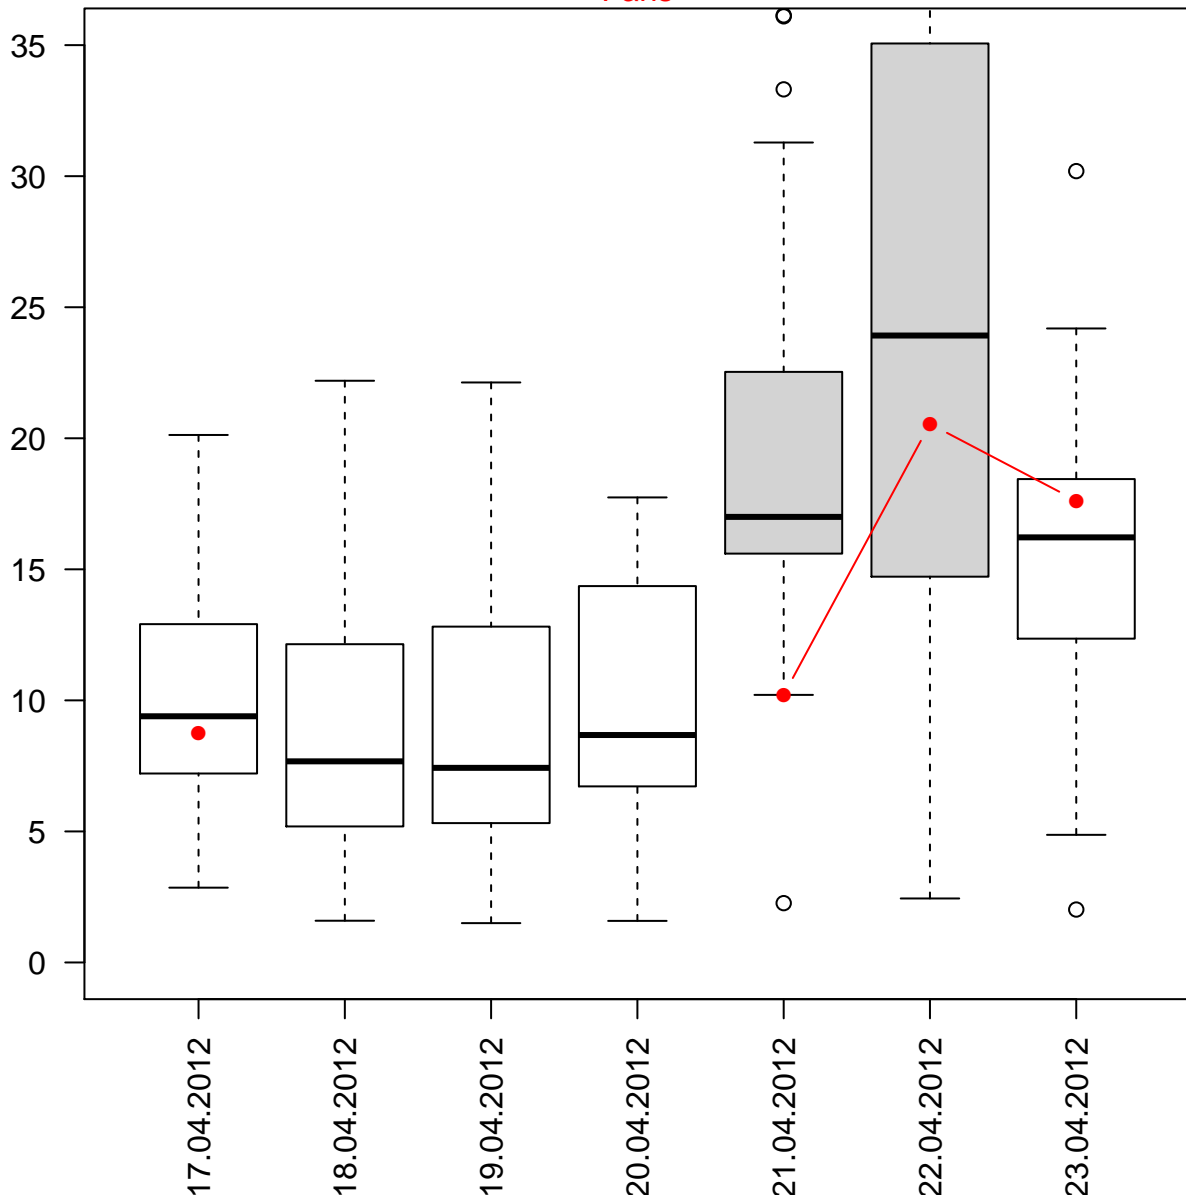

# MDMA loads % per weekday

Zagreb

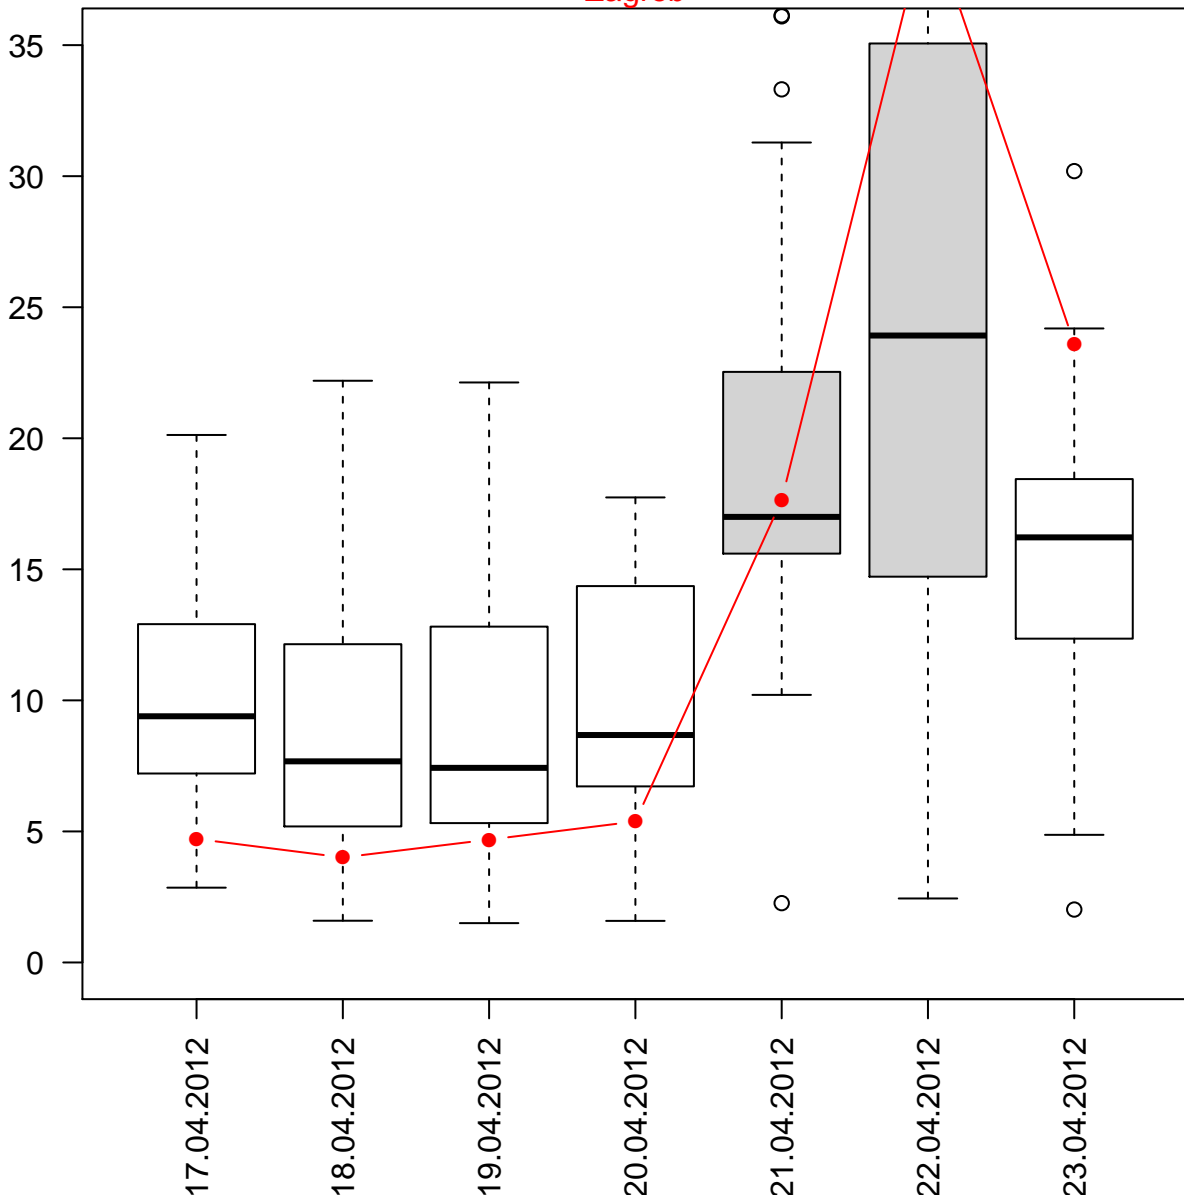

# MDMA loads % per weekday

Milan

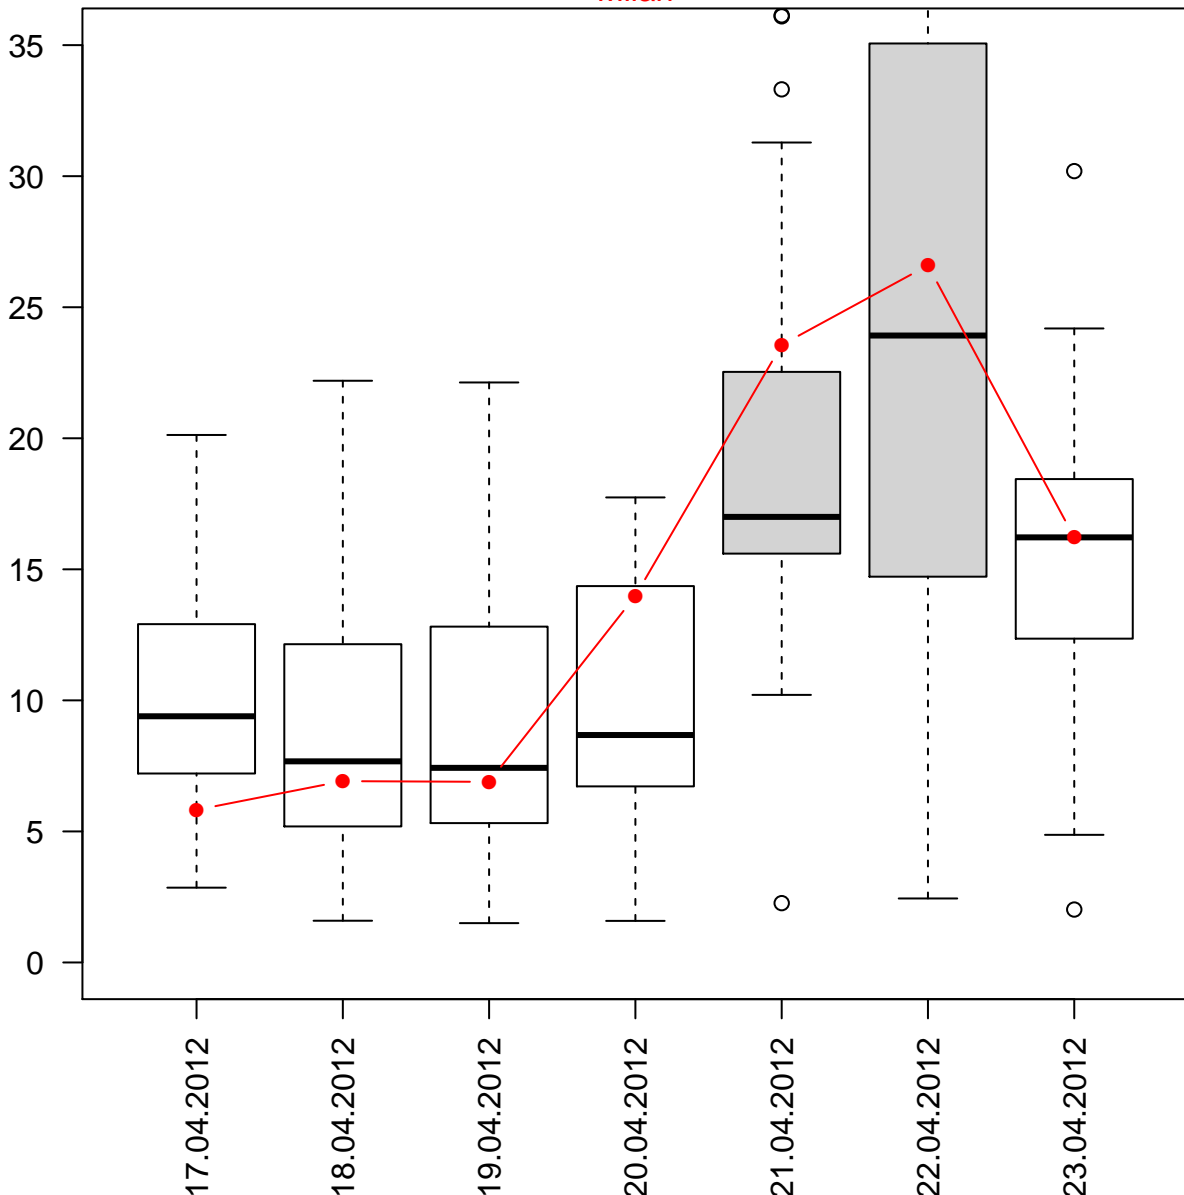

# MDMA loads % per weekday

Amsterdam

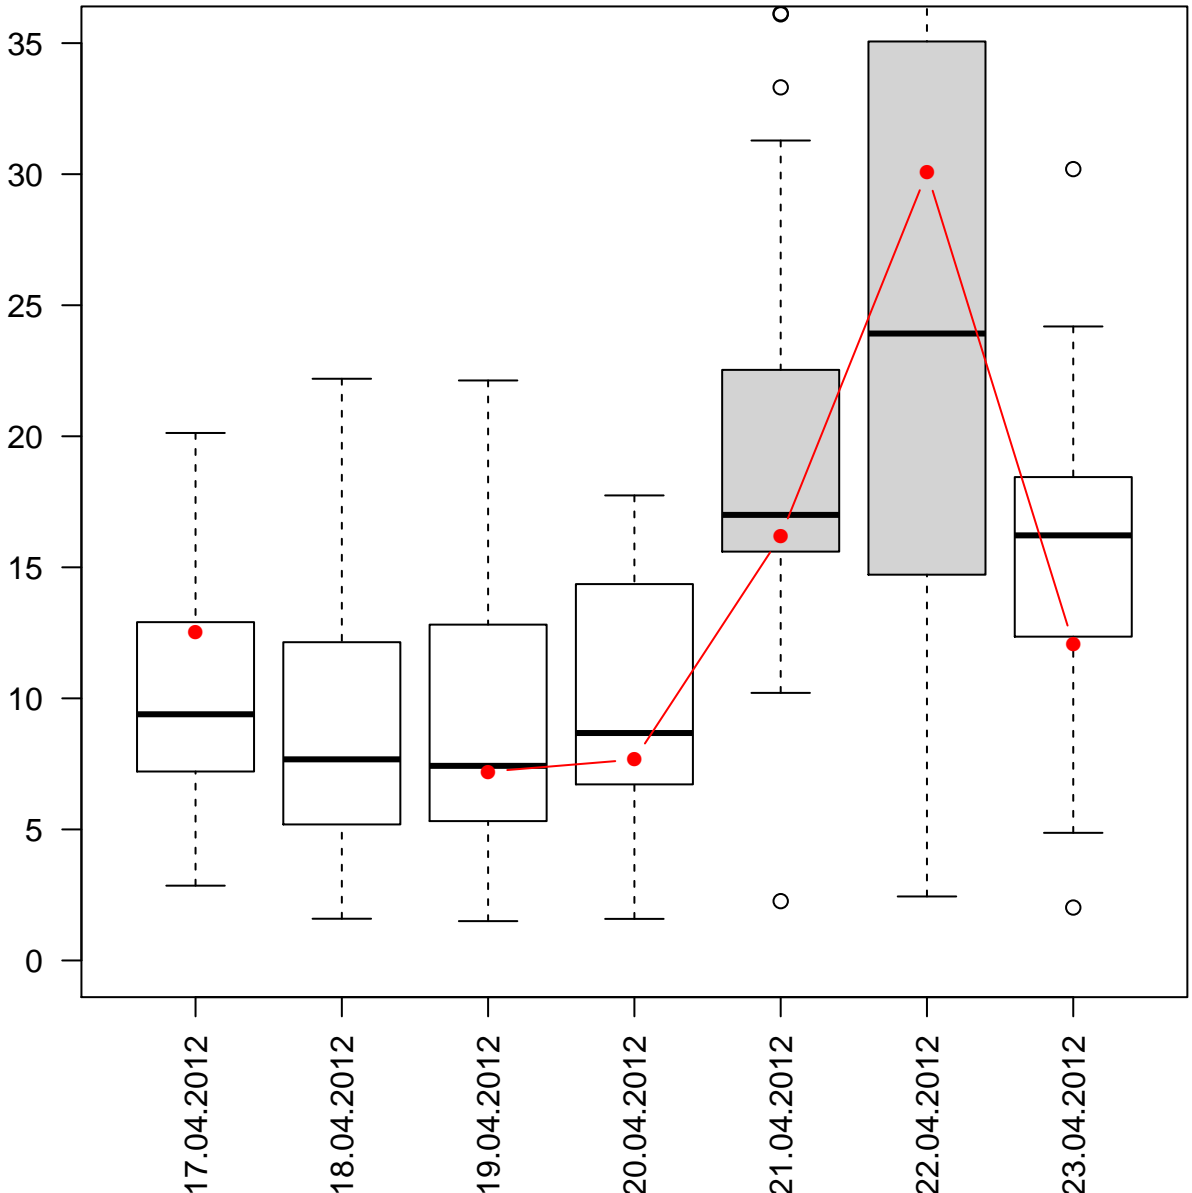

# MDMA loads % per weekday

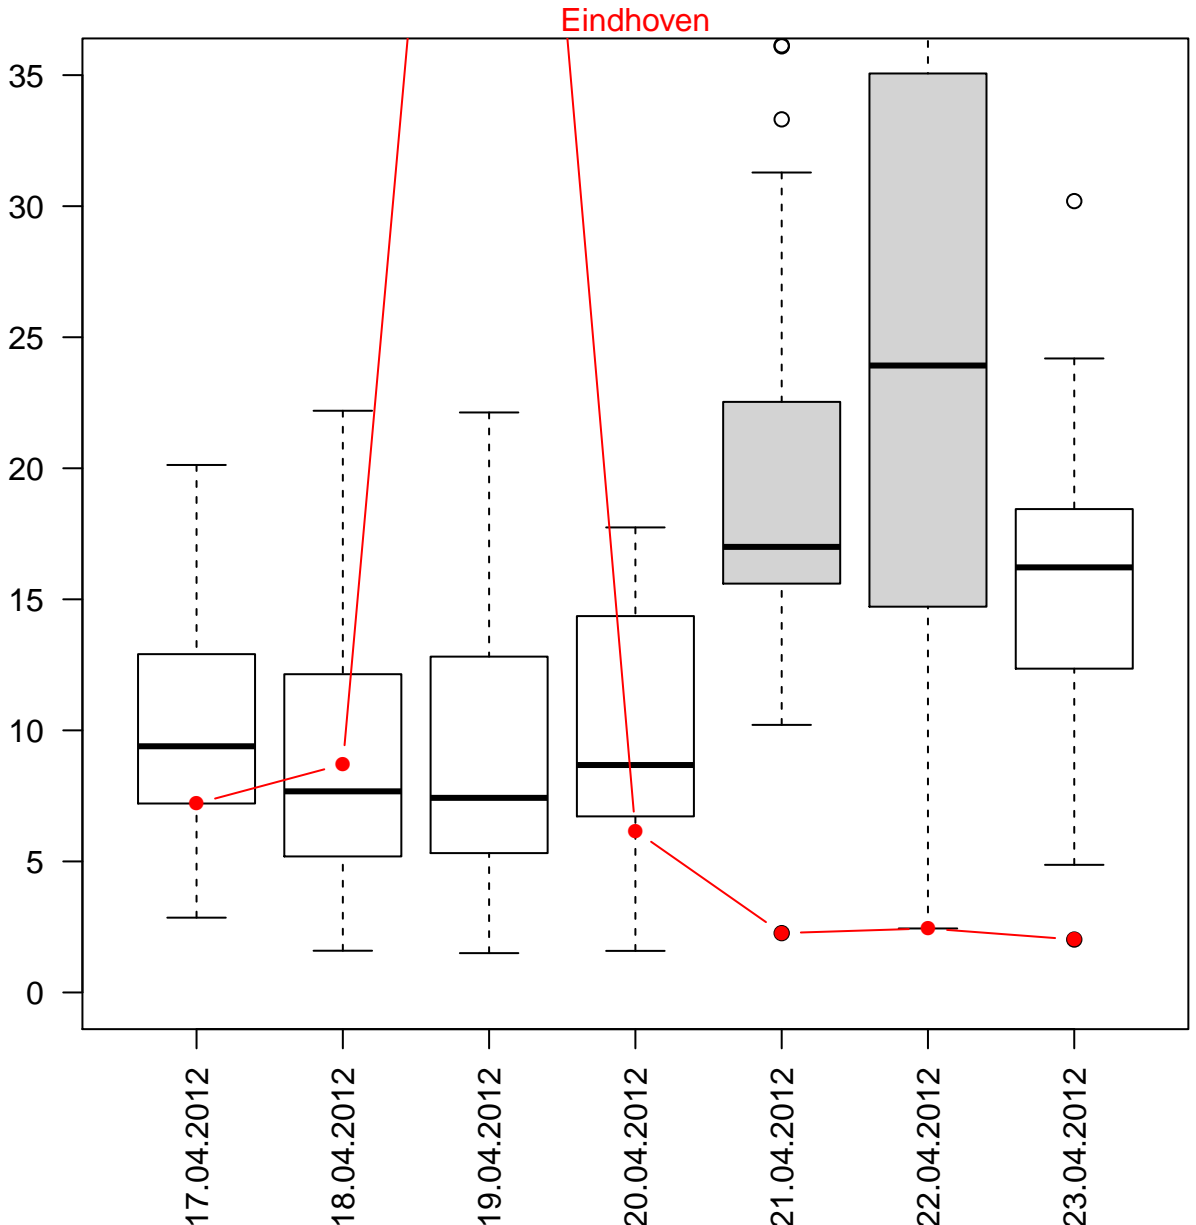

# MDMA loads % per weekday

Utrecht

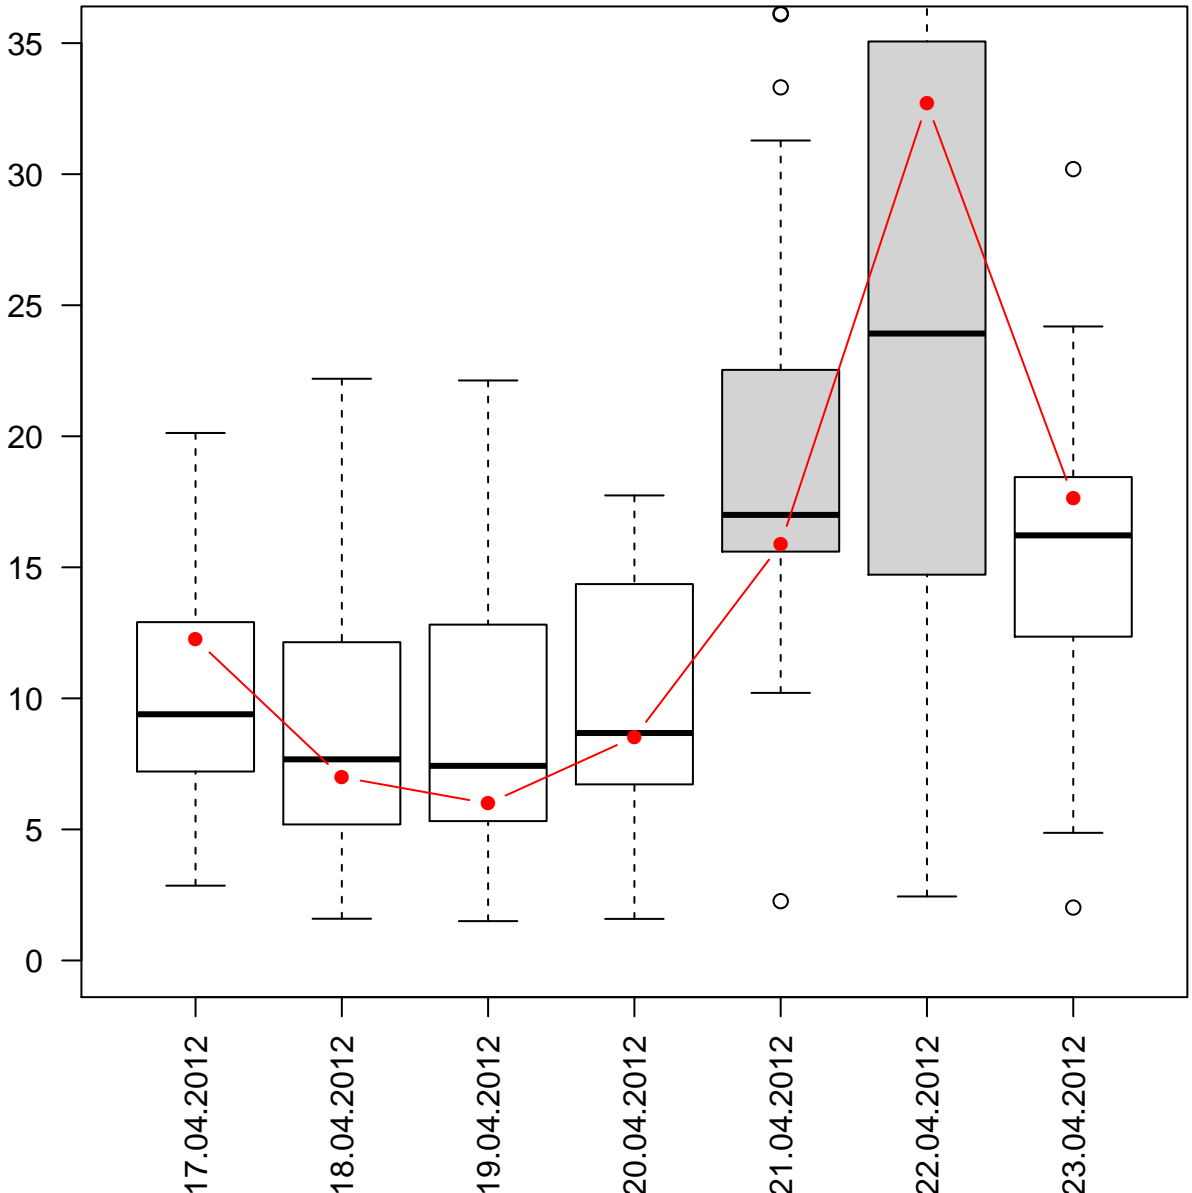



# MDMA loads % per weekday

Oslo

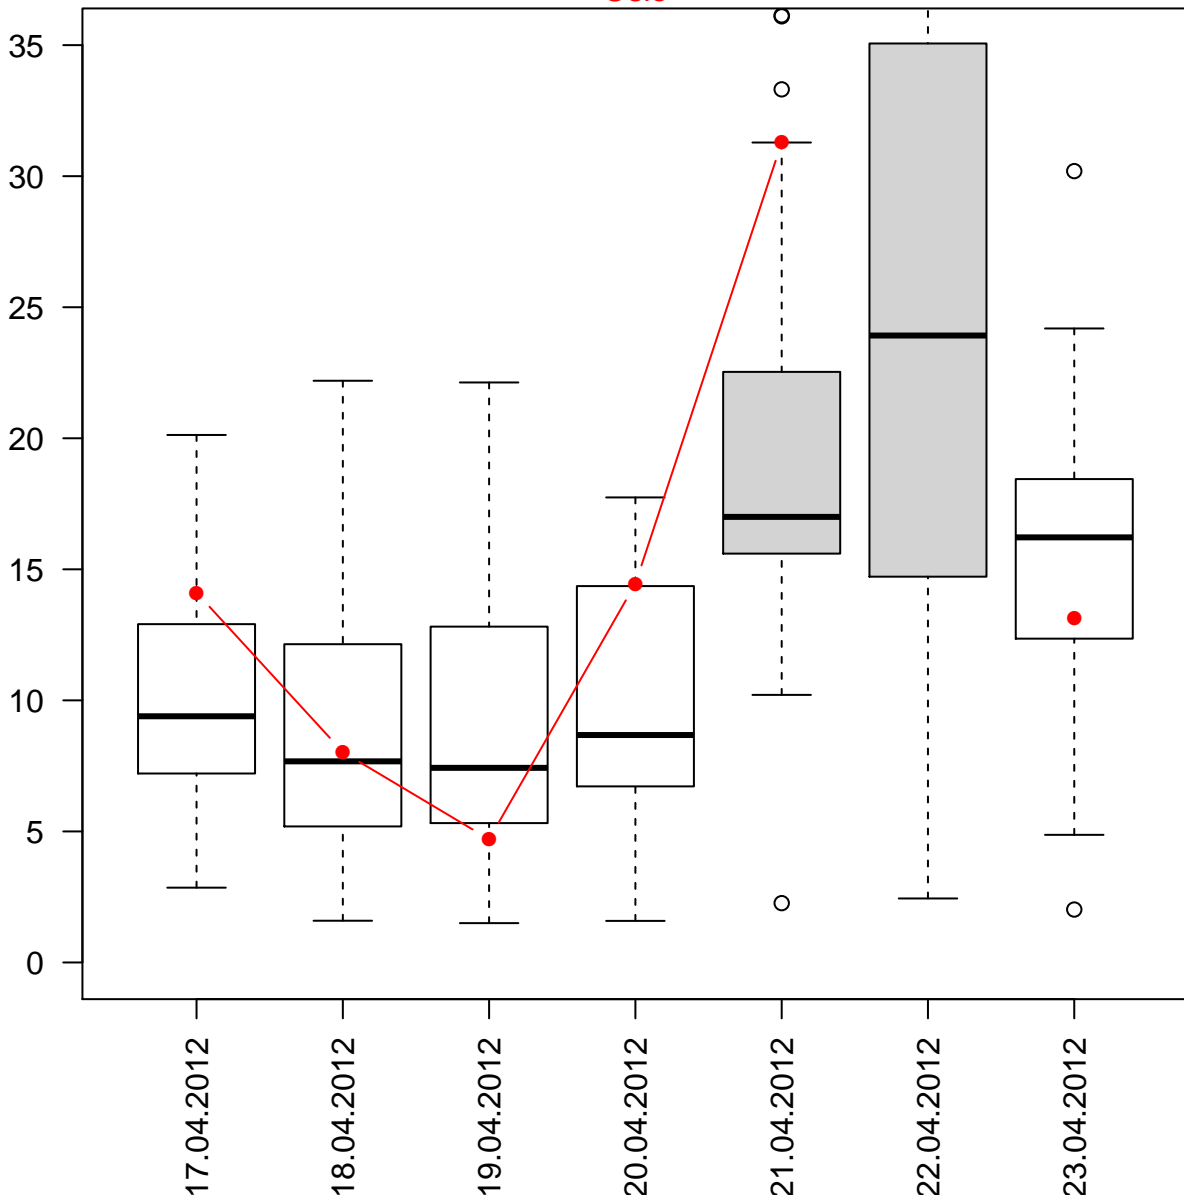

# MDMA loads % per weekday

Gothenburg

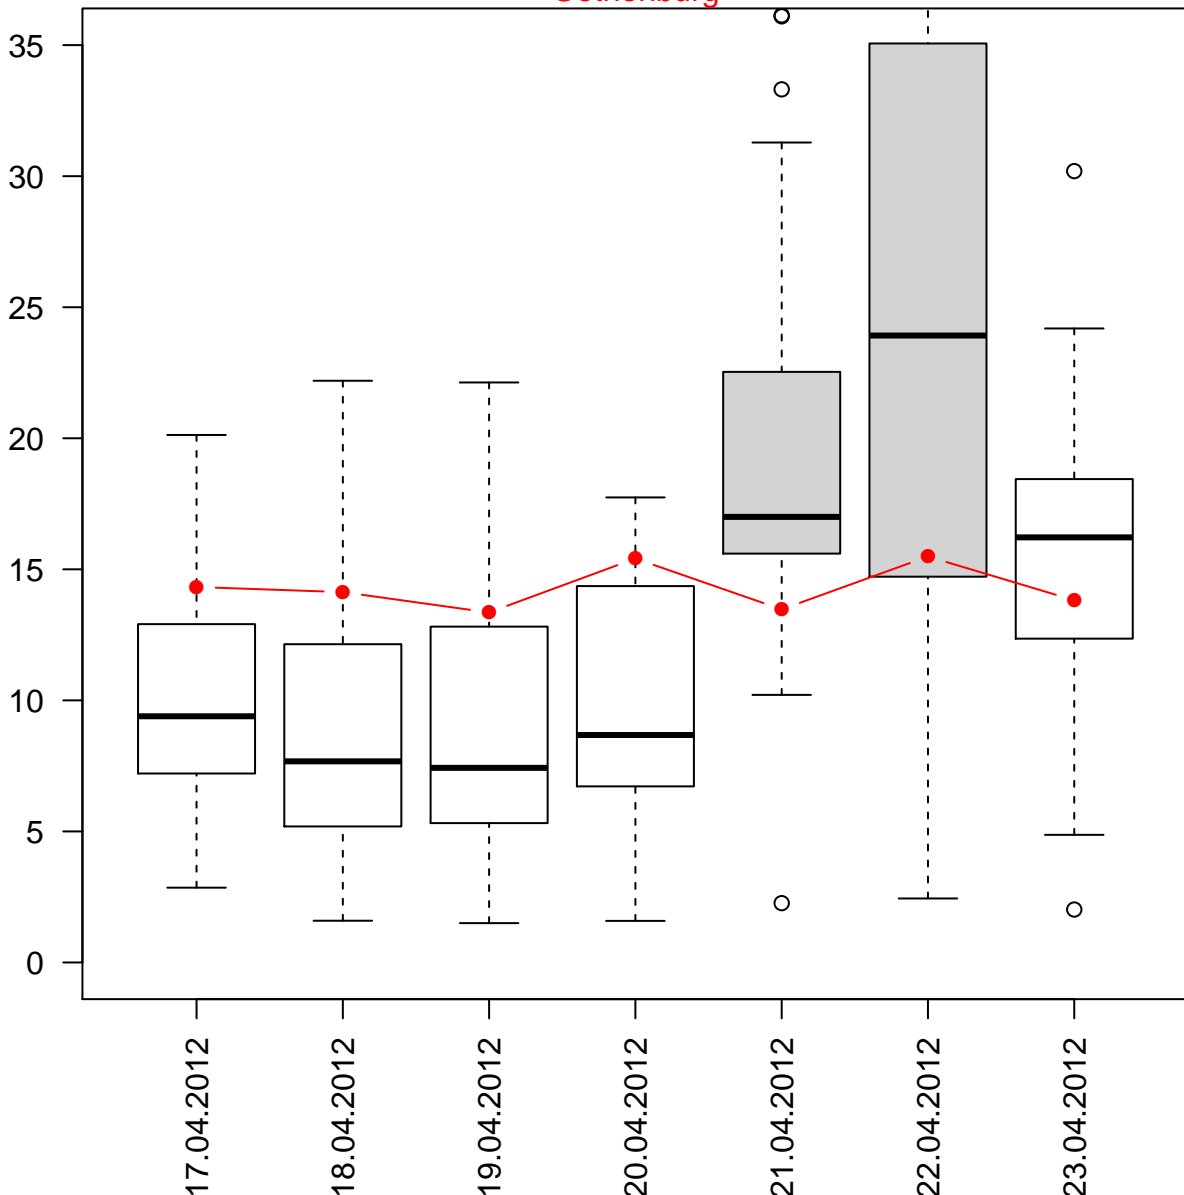

# MDMA loads % per weekday

Umeå

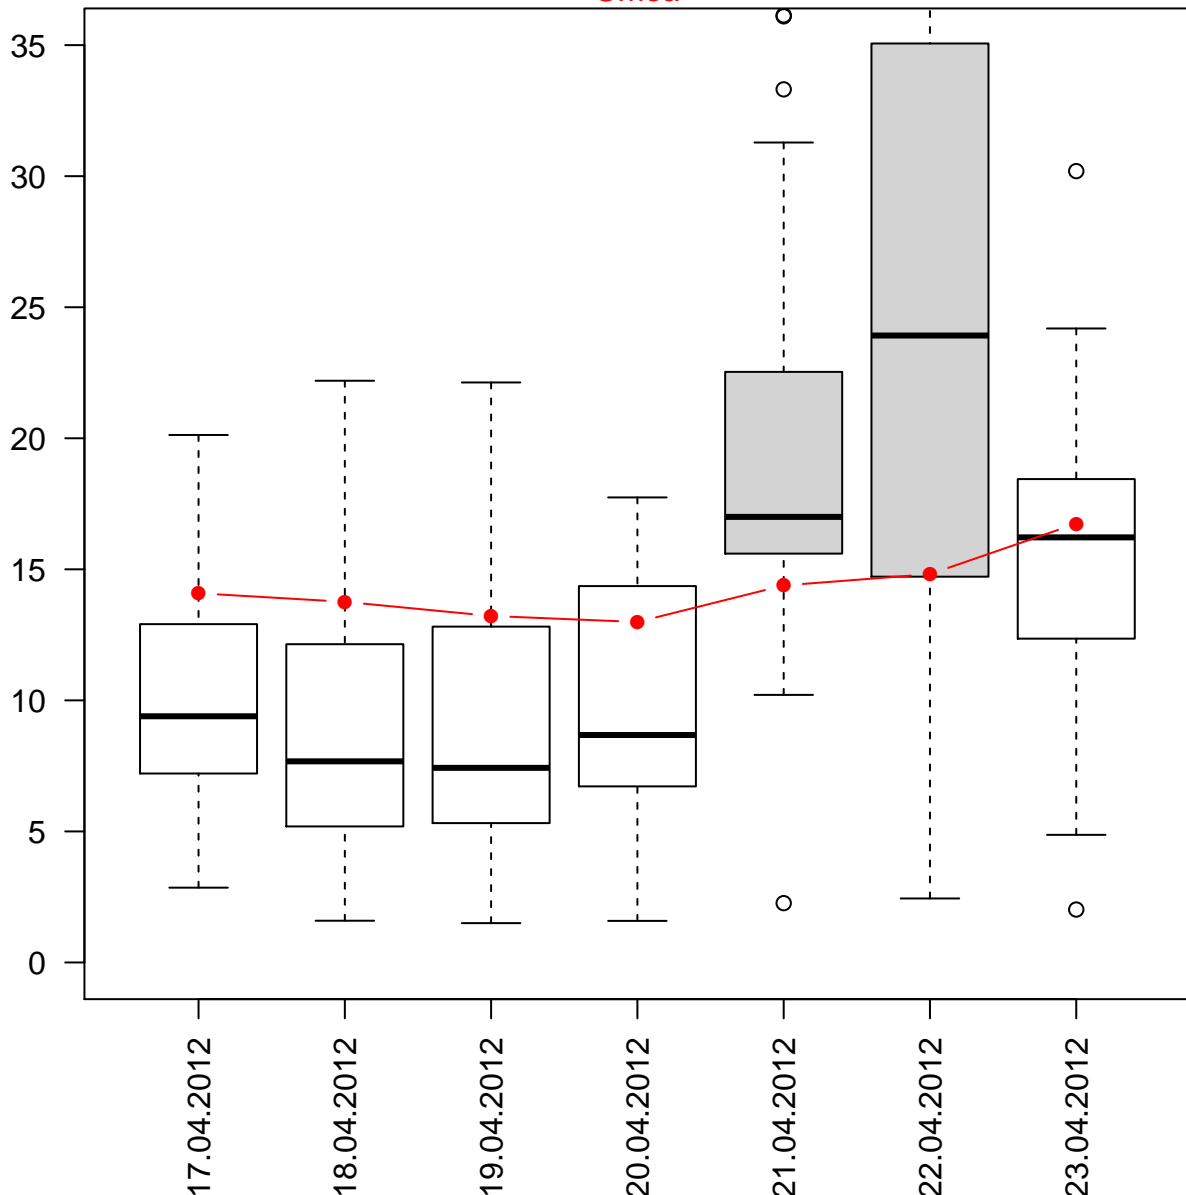

# THC-COOH loads % per weekday

Antwerp Z.

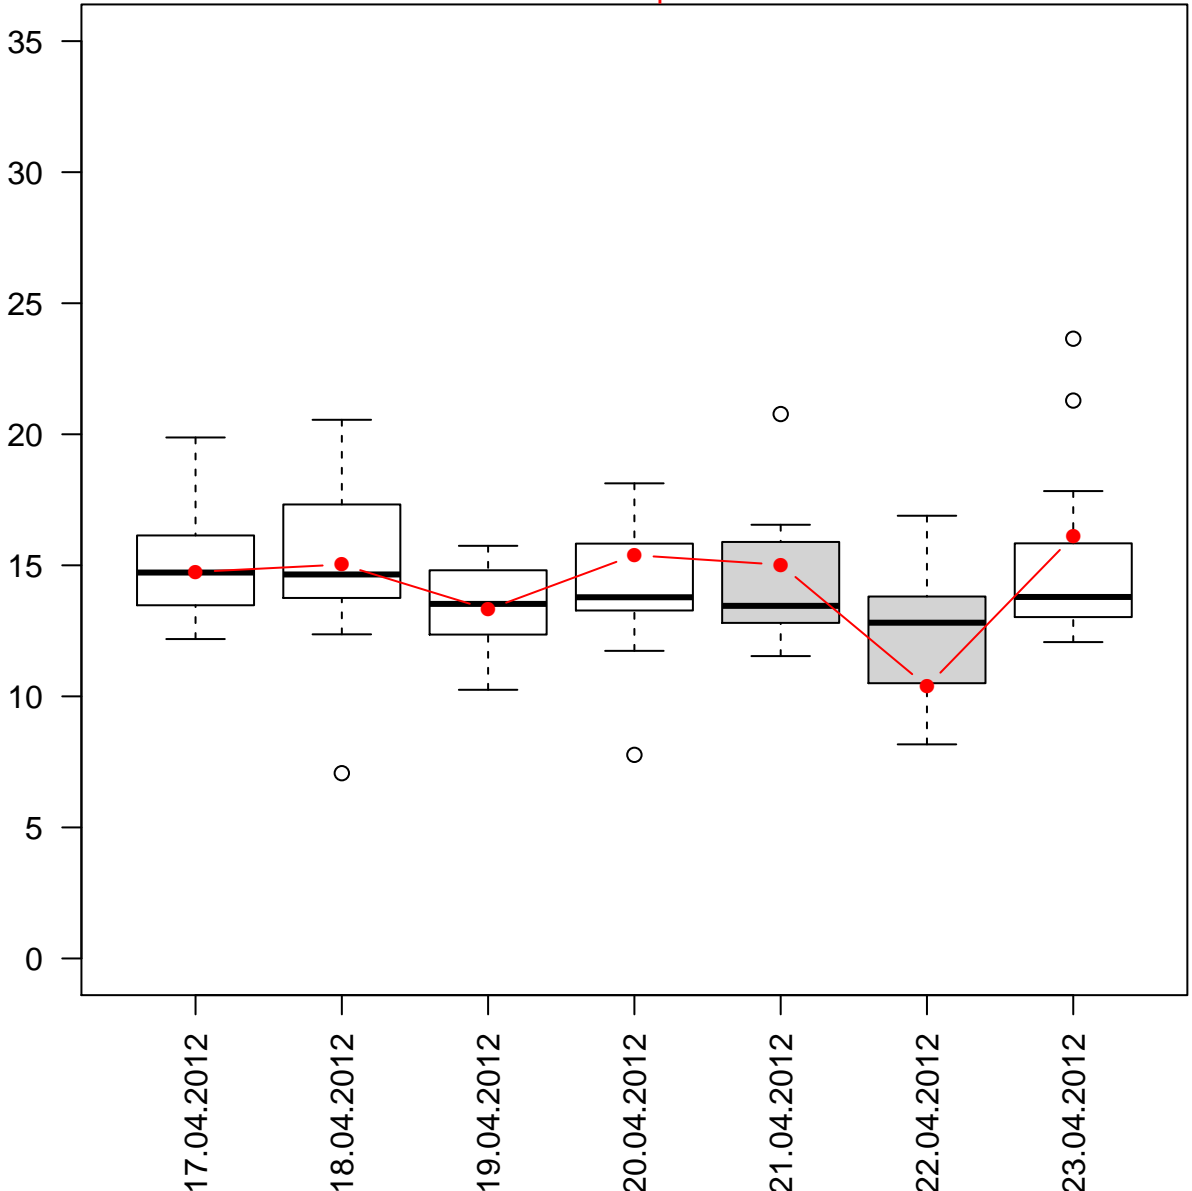

# THC-COOH loads % per weekday

Antwerp D.

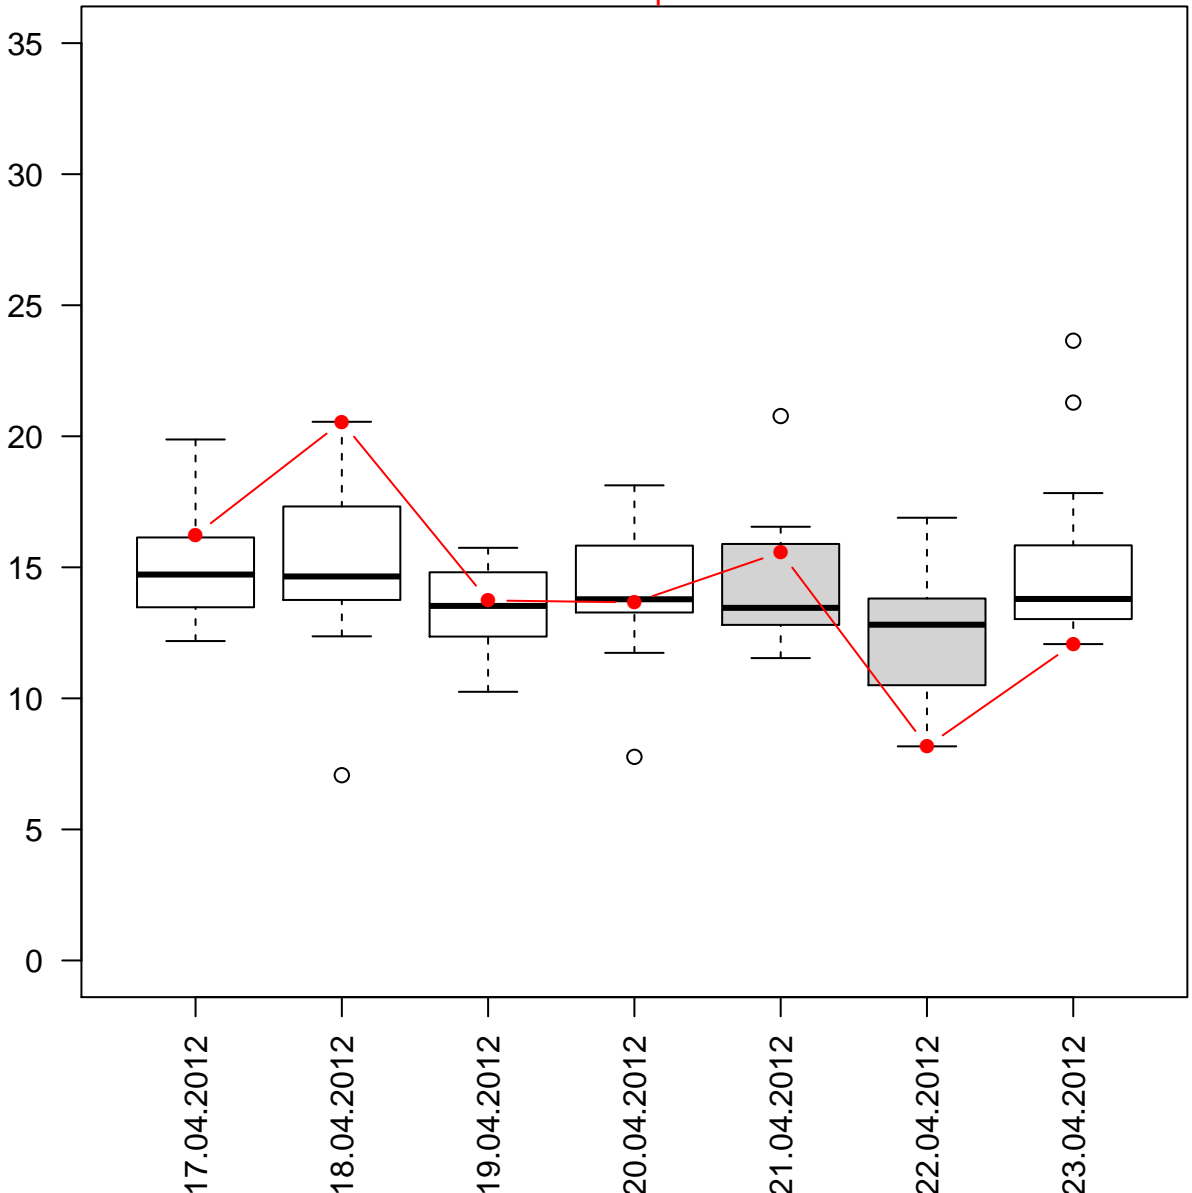

# THC-COOH loads % per weekday

Brussels

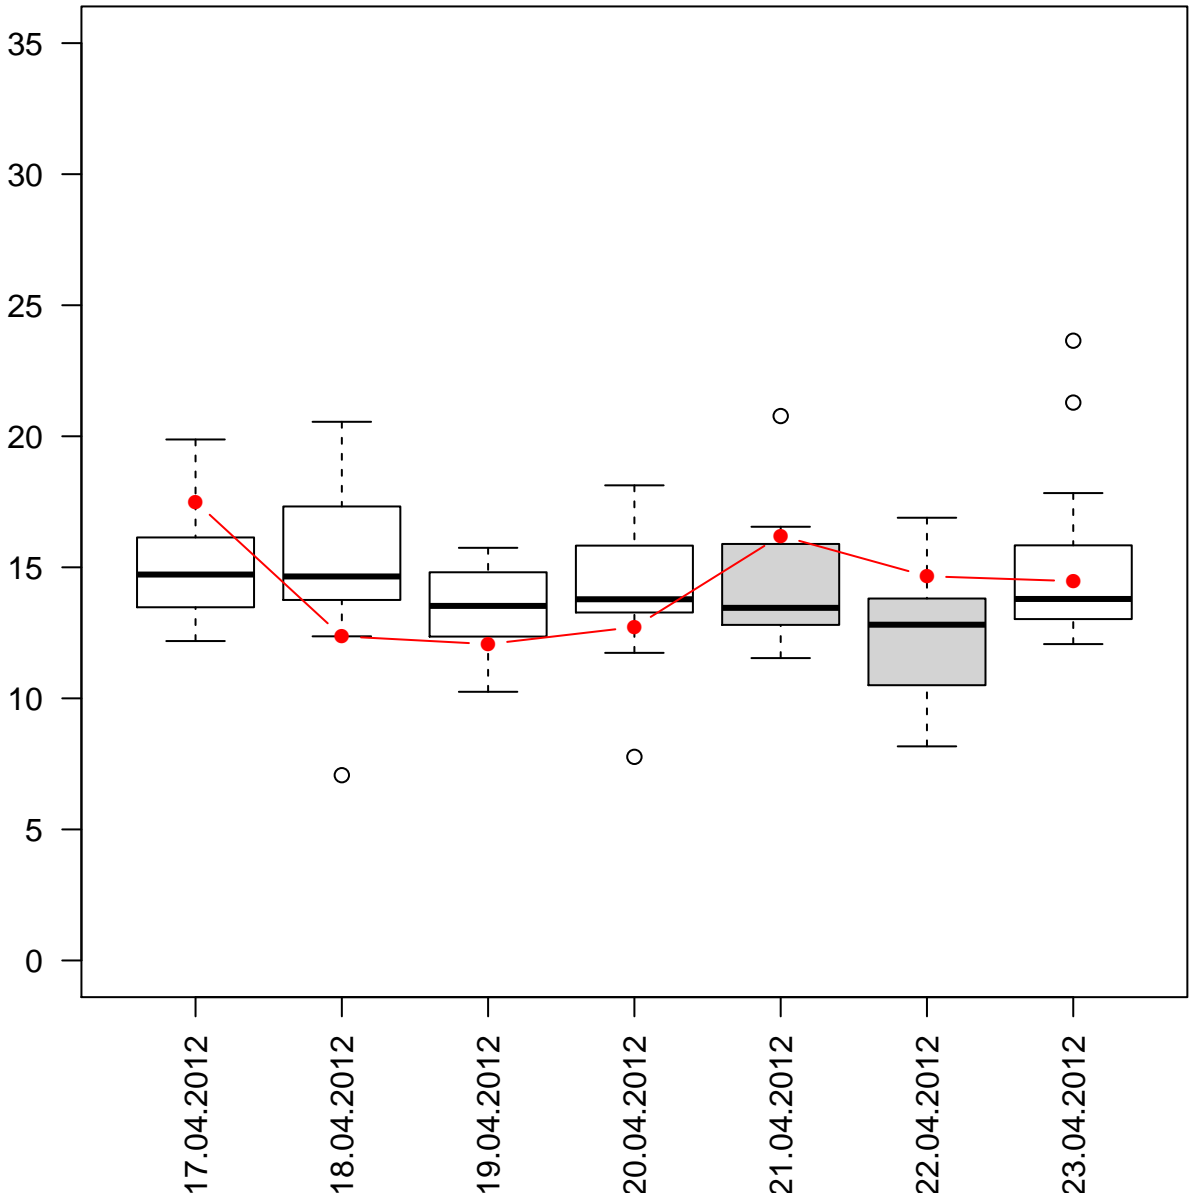

# THC-COOH loads % per weekday

Budweis

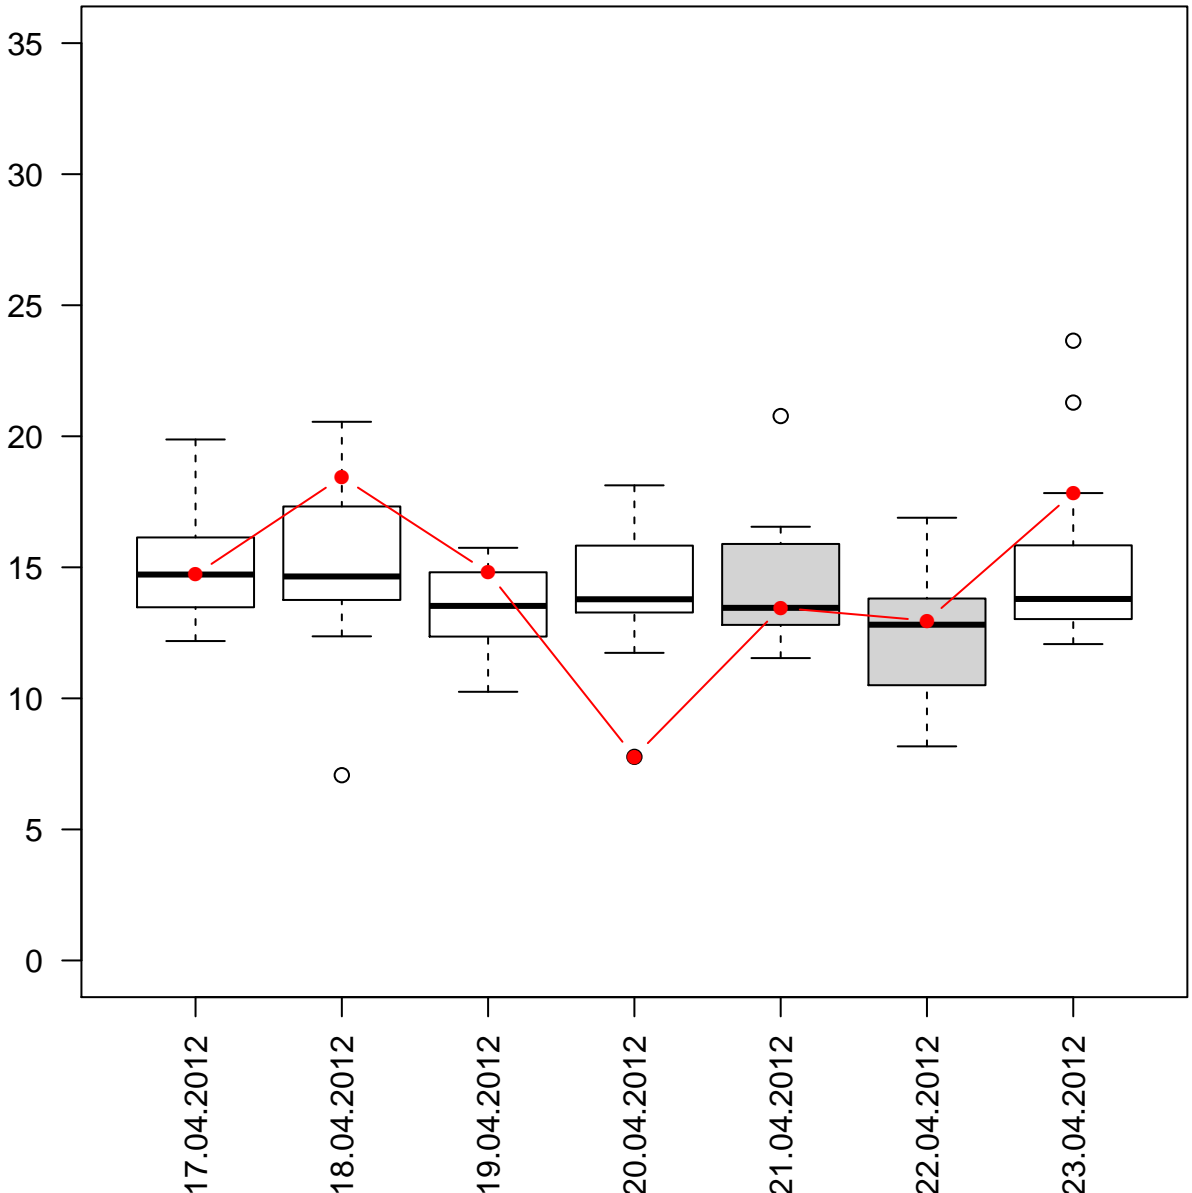

# THC-COOH loads % per weekday

Prague

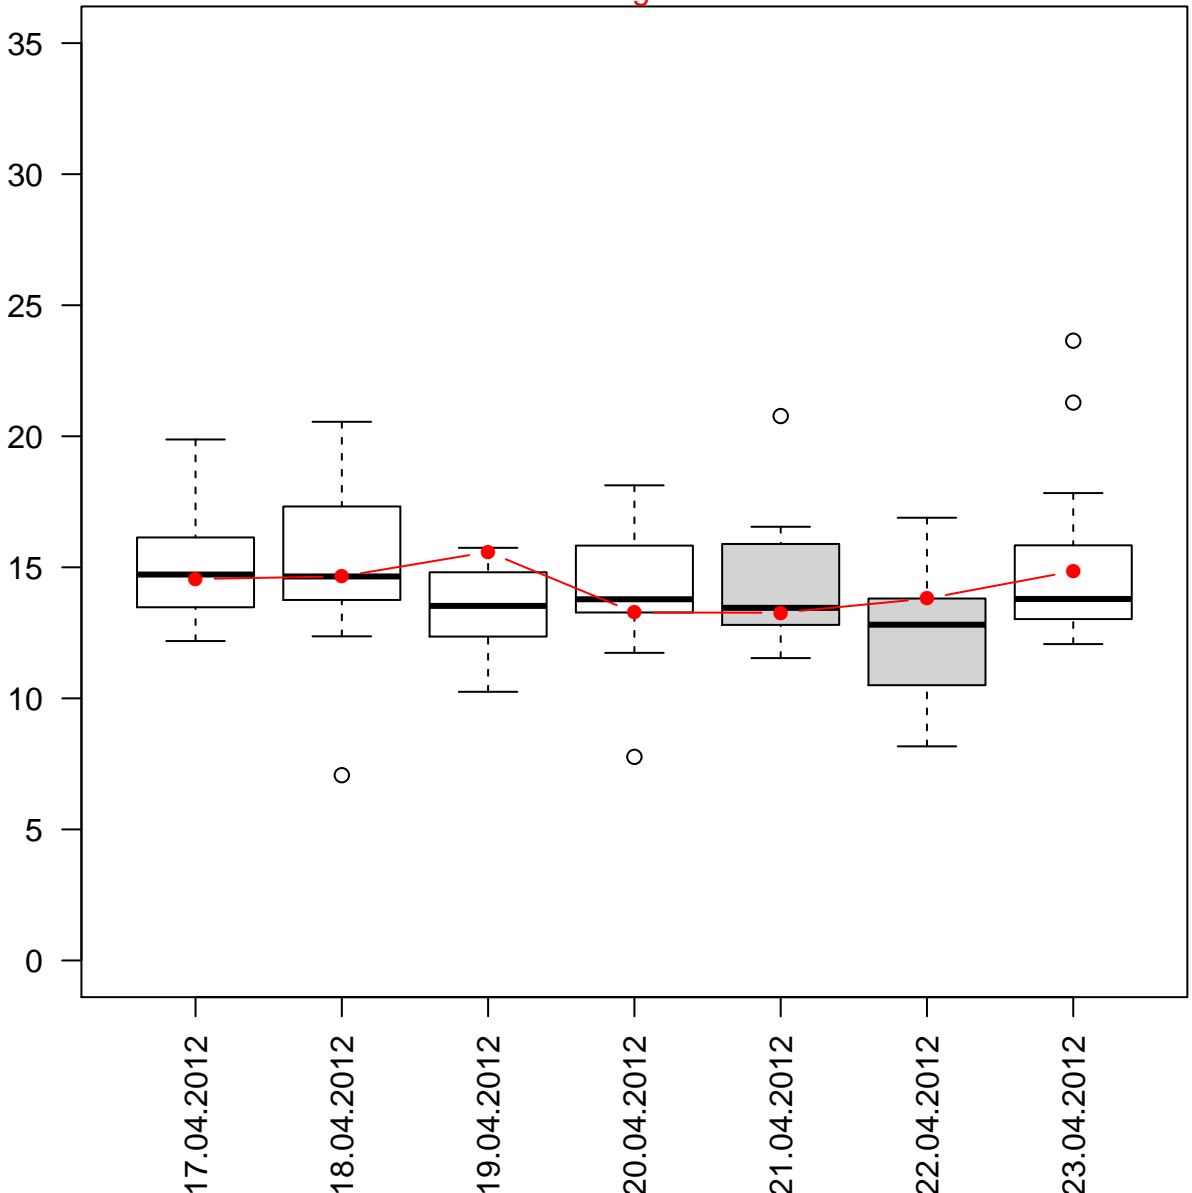



# THC-COOH loads % per weekday

Castellon

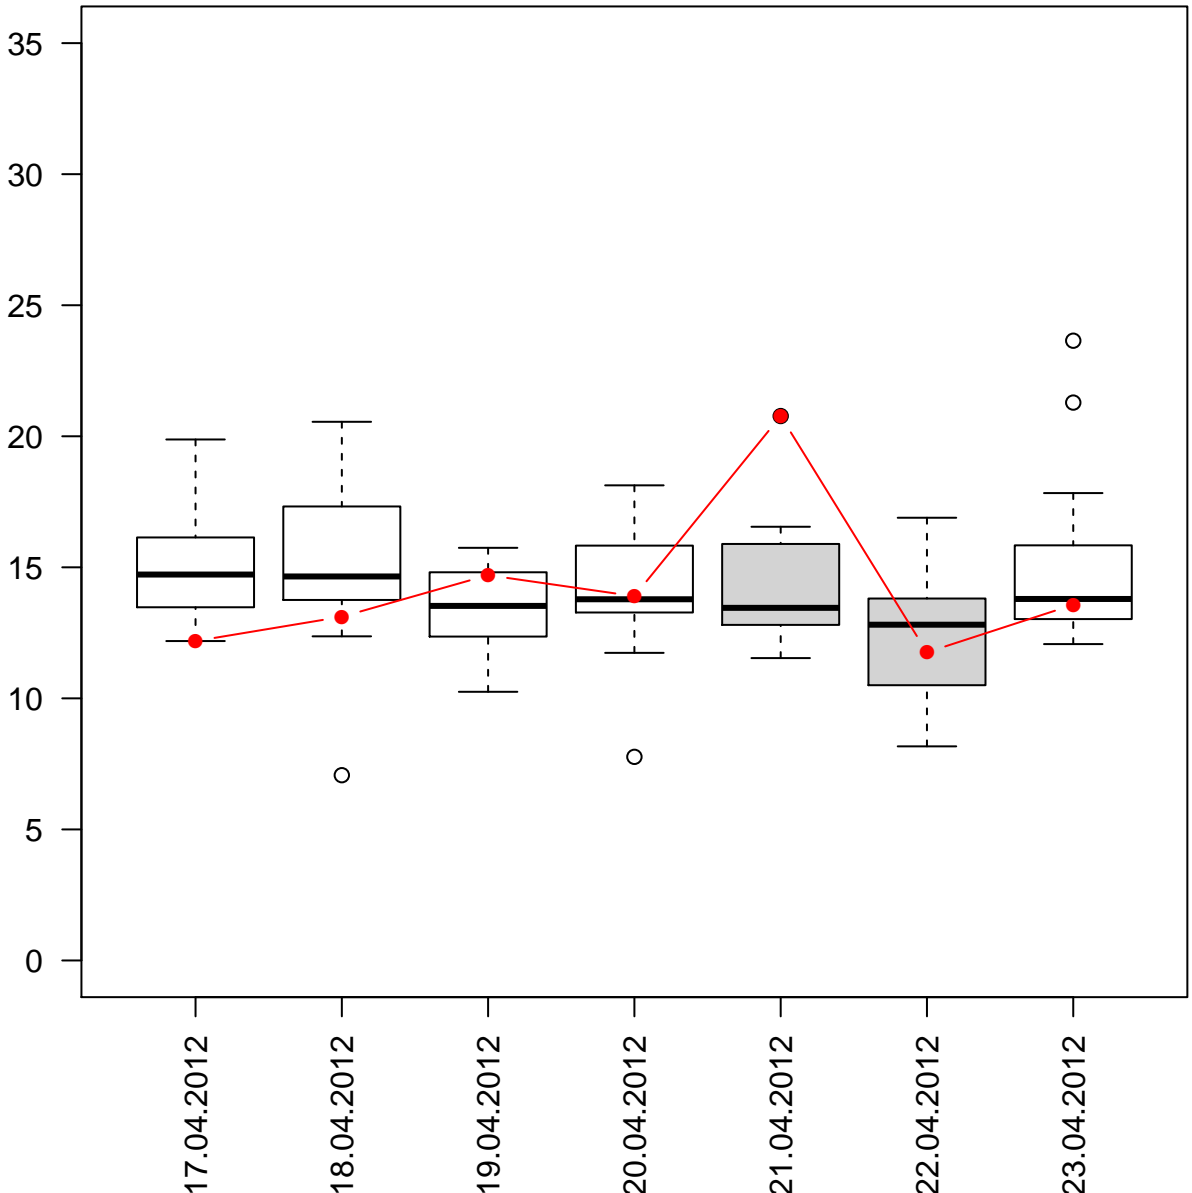

# THC-COOH loads % per weekday

Santiago

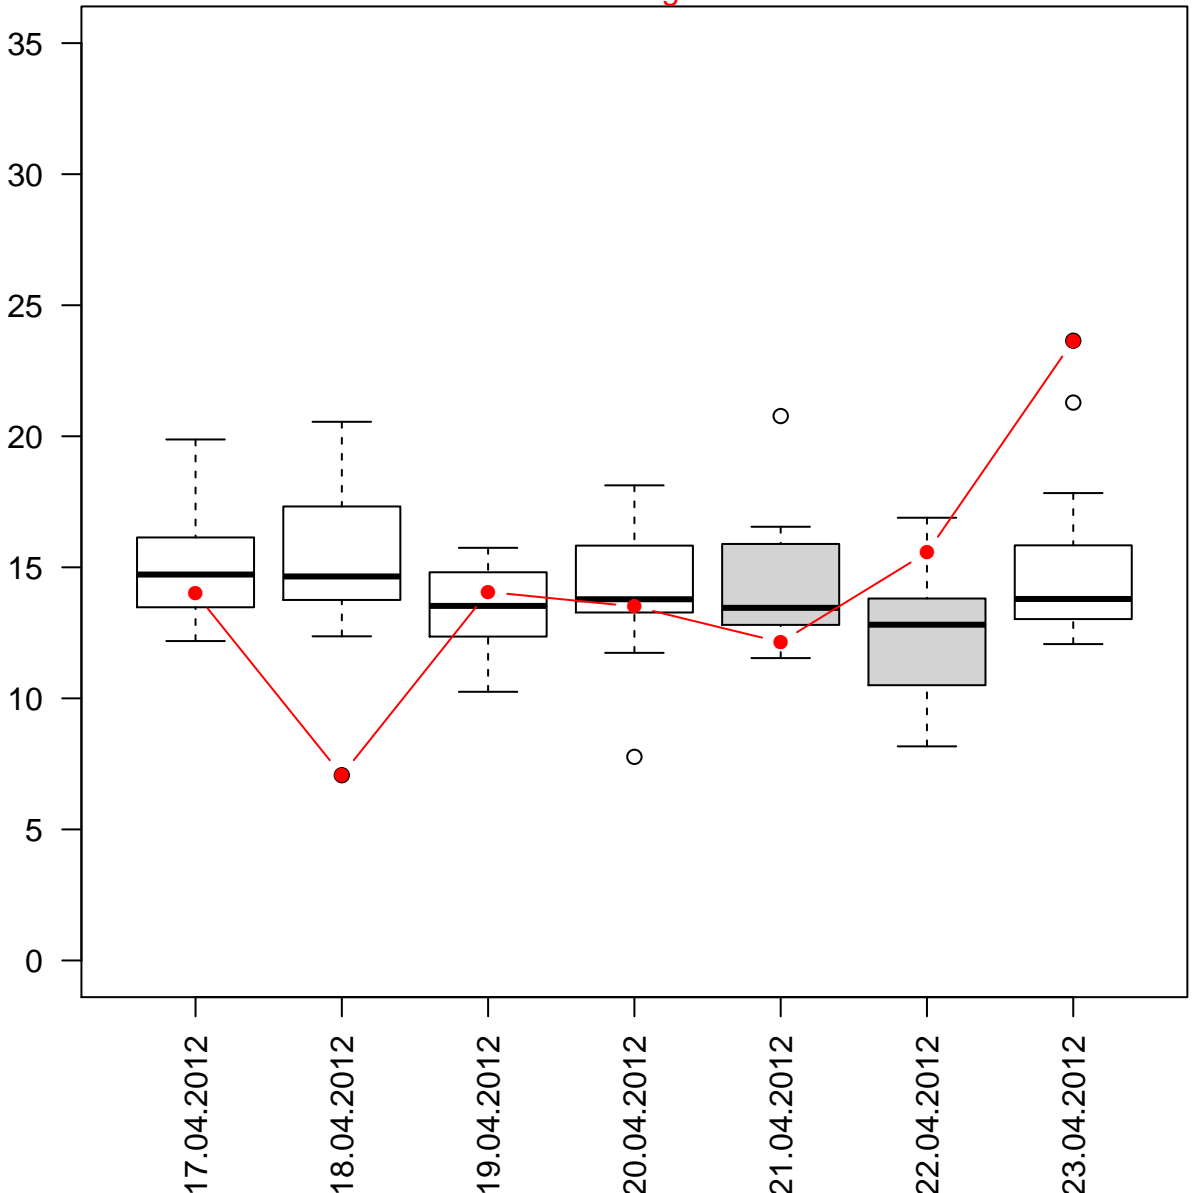

# THC-COOH loads % per weekday

Barcelona

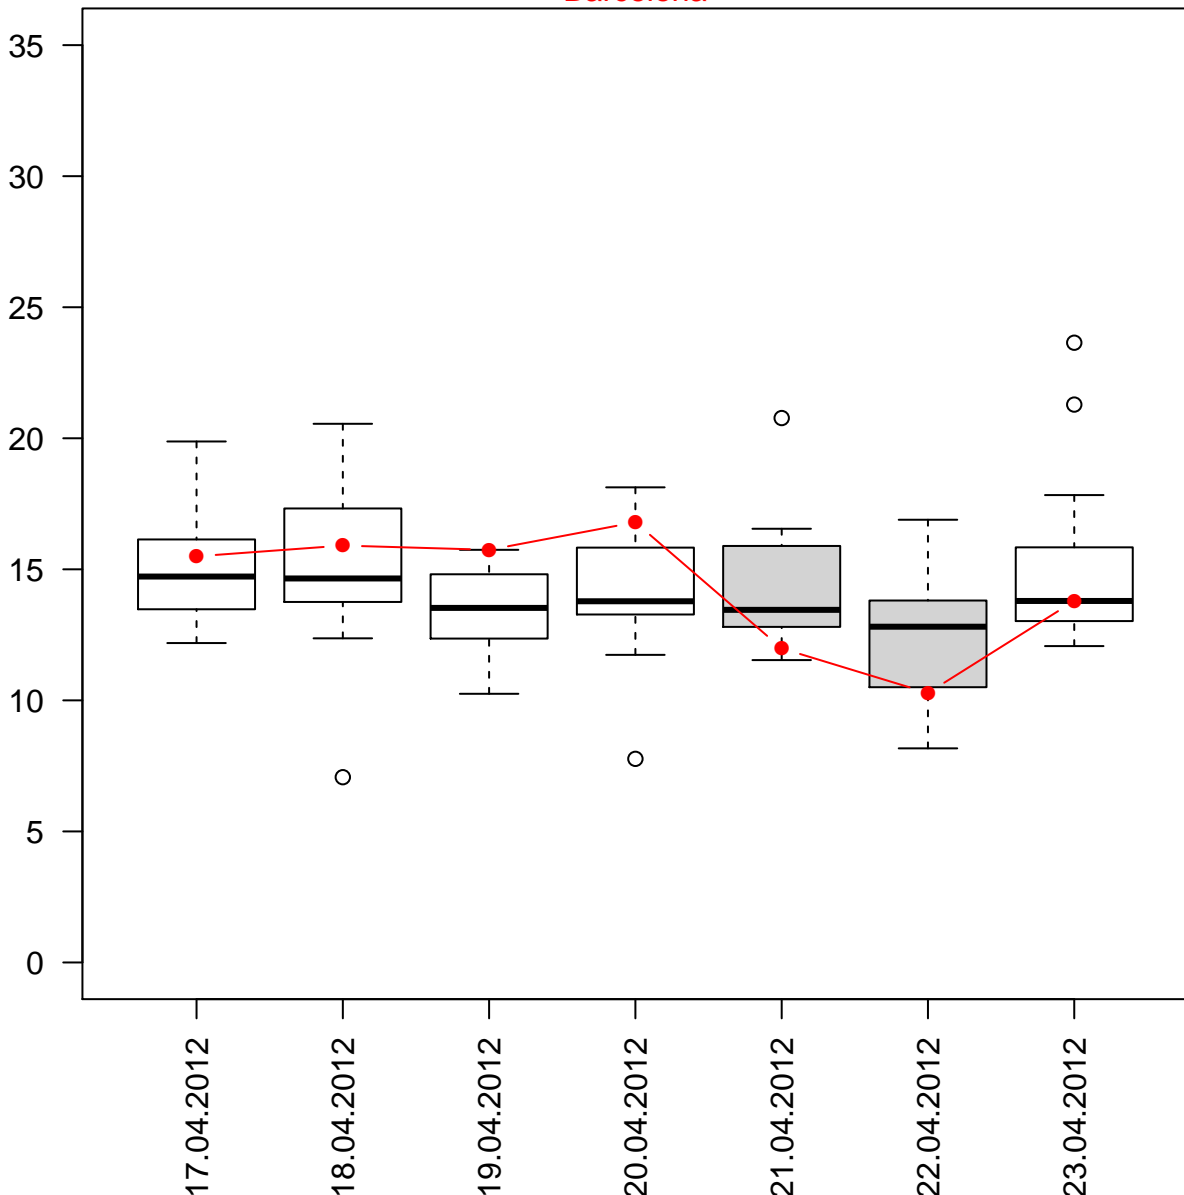

# THC-COOH loads % per weekday

Paris

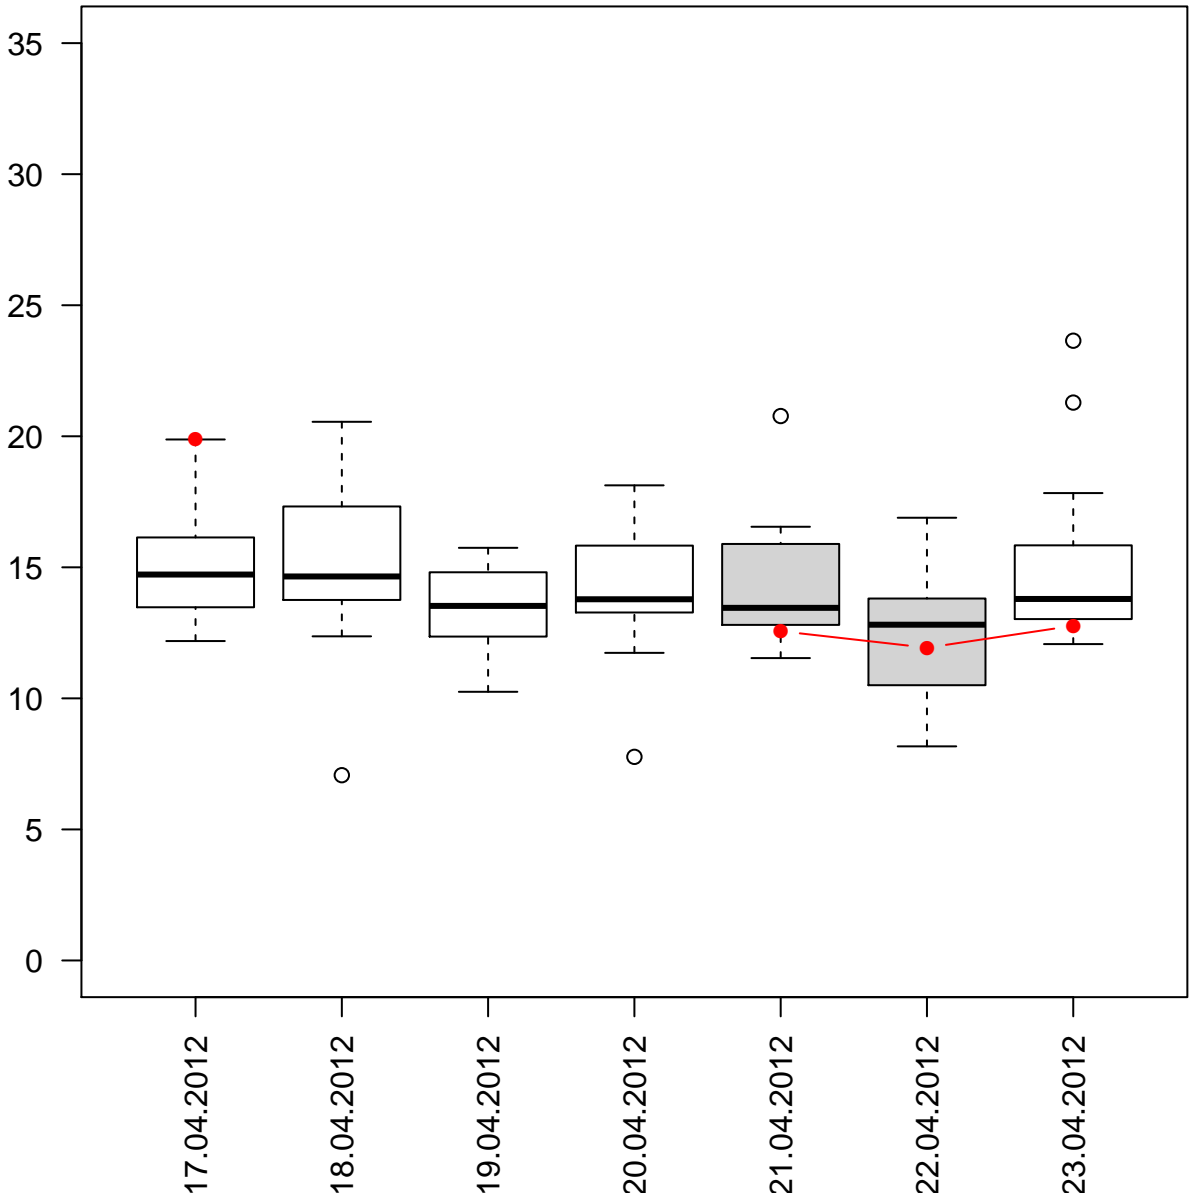

# THC-COOH loads % per weekday

Zagreb

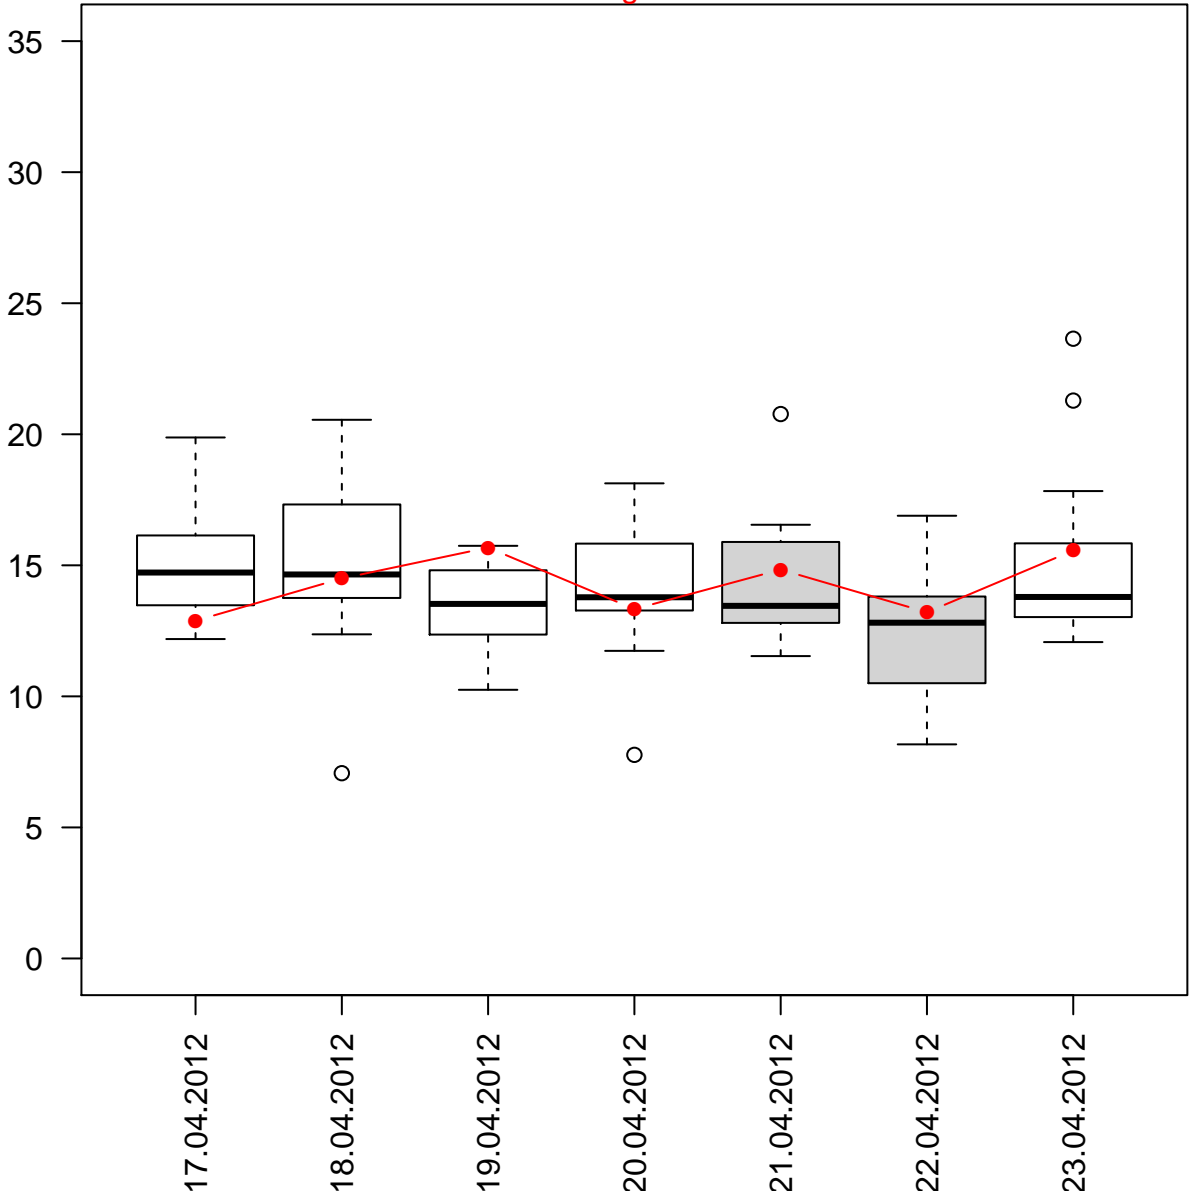

# THC-COOH loads % per weekday

Milan

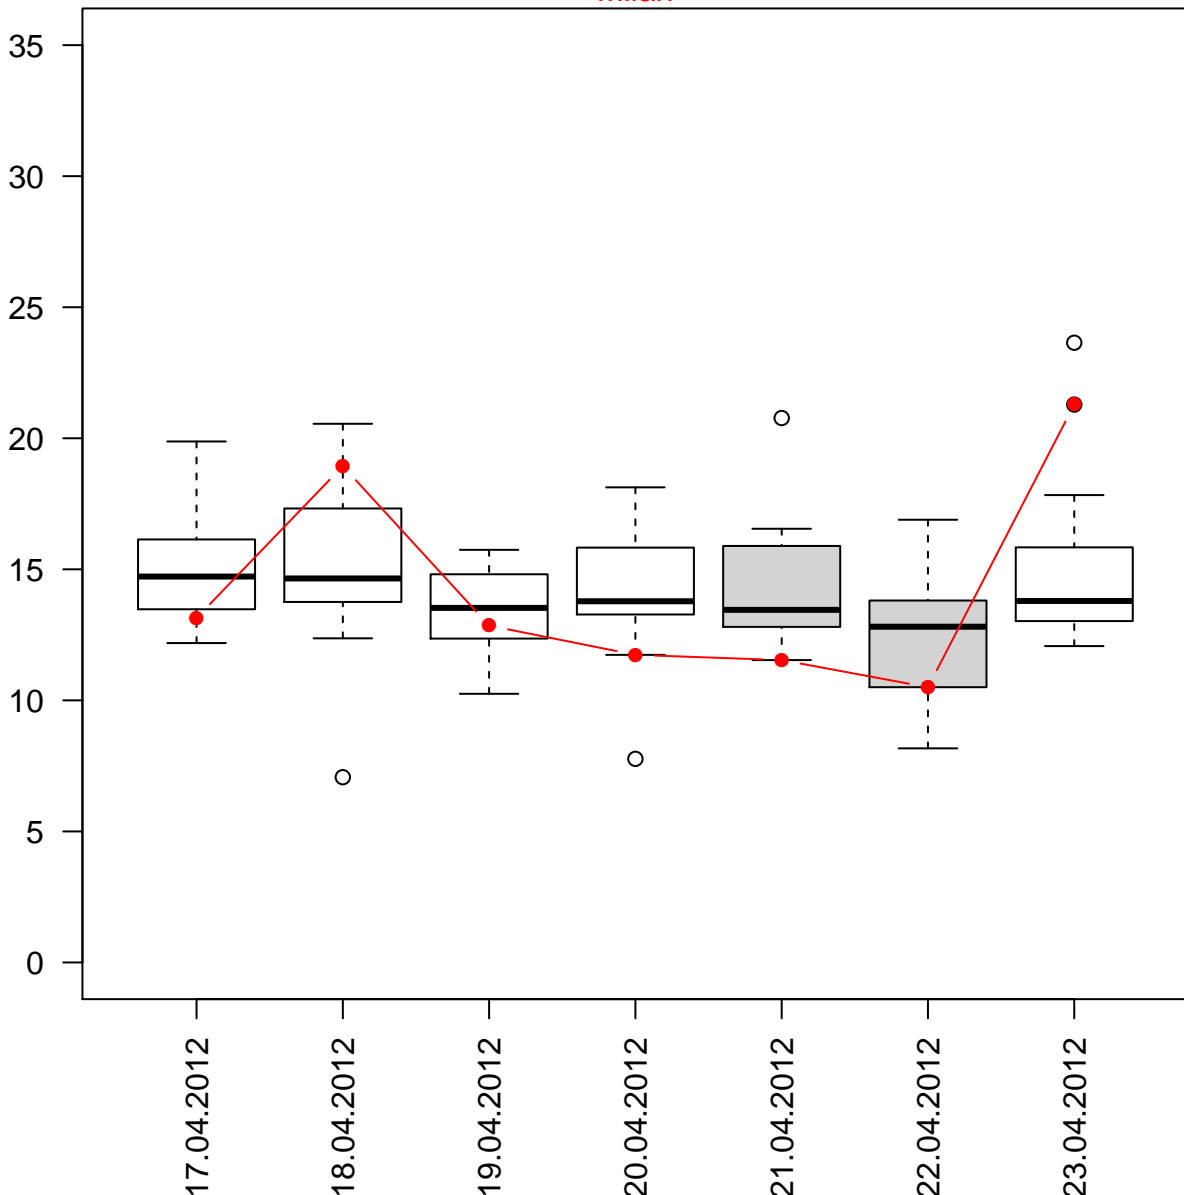

# THC-COOH loads % per weekday

Amsterdam

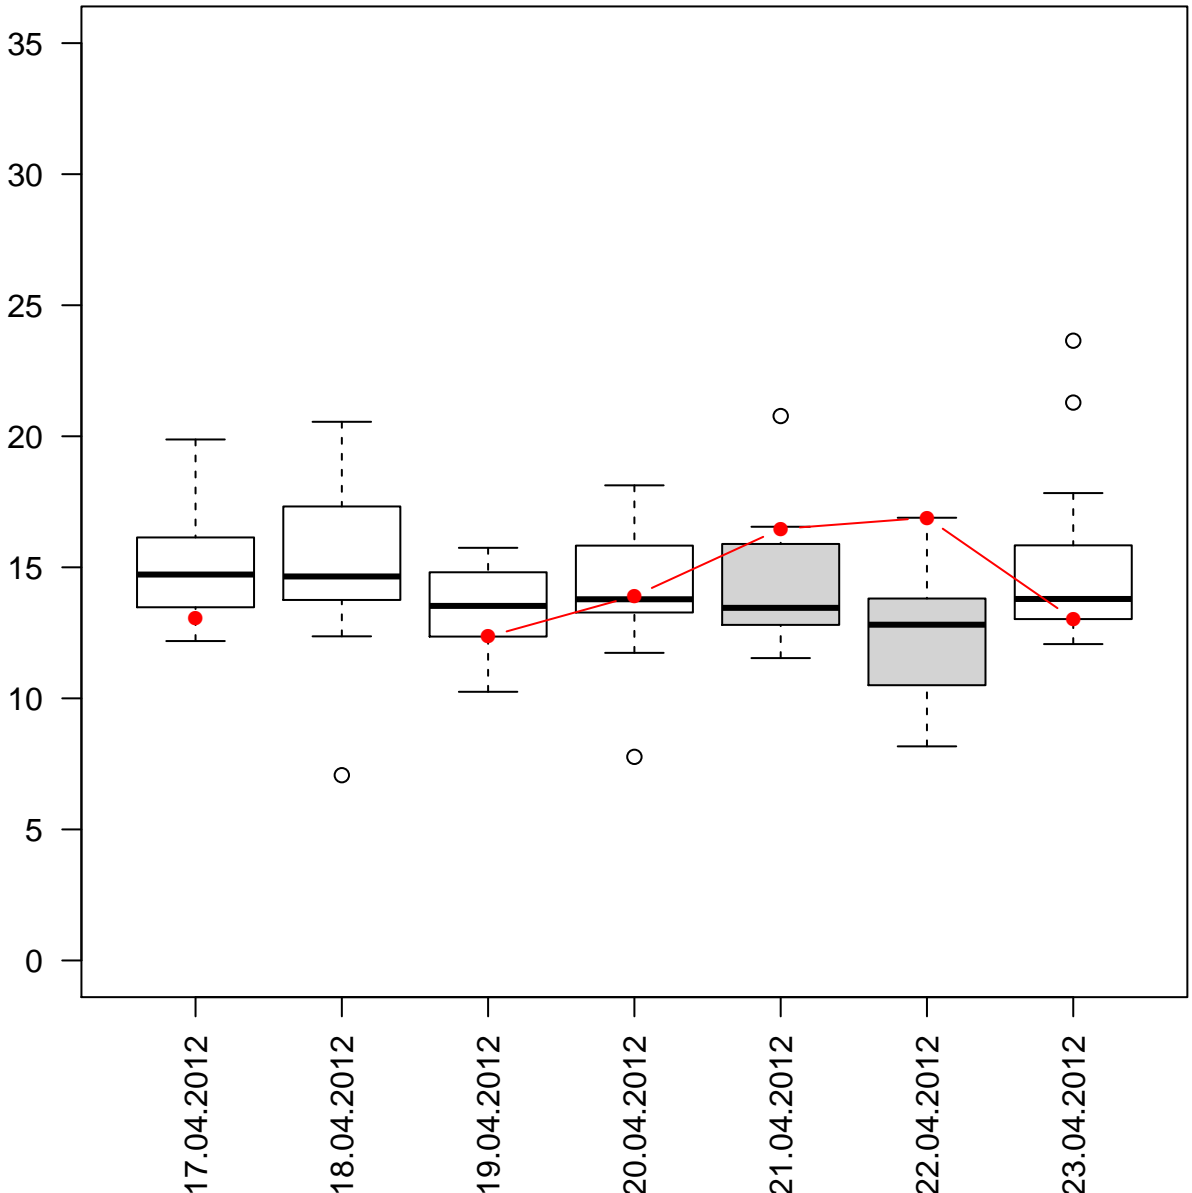

# THC-COOH loads % per weekday

Eindhoven

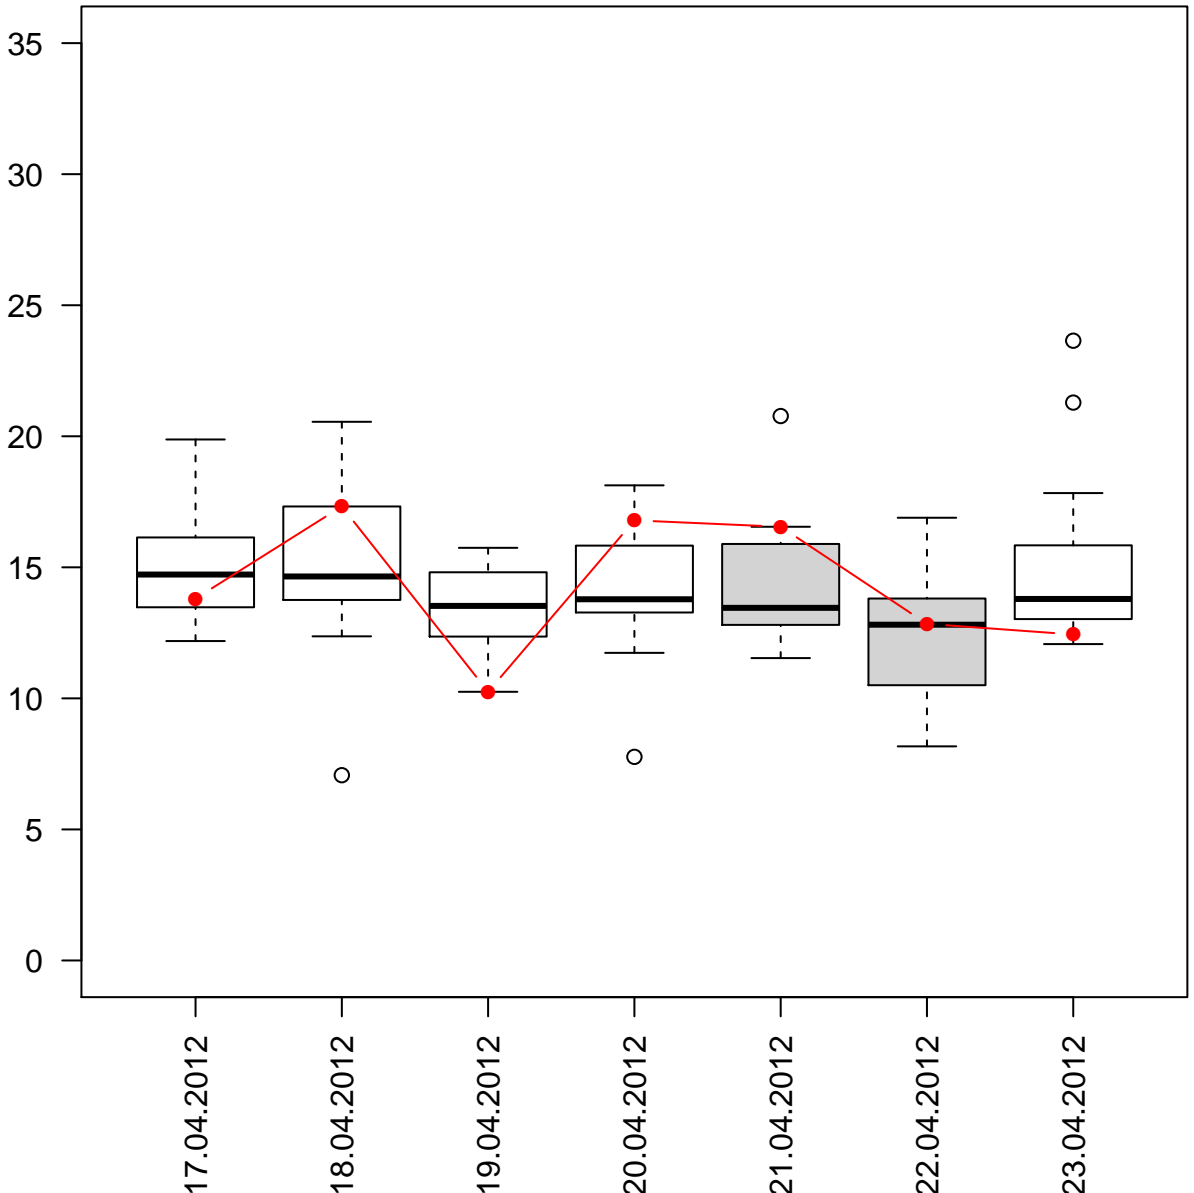



# THC-COOH loads % per weekday

Utrecht

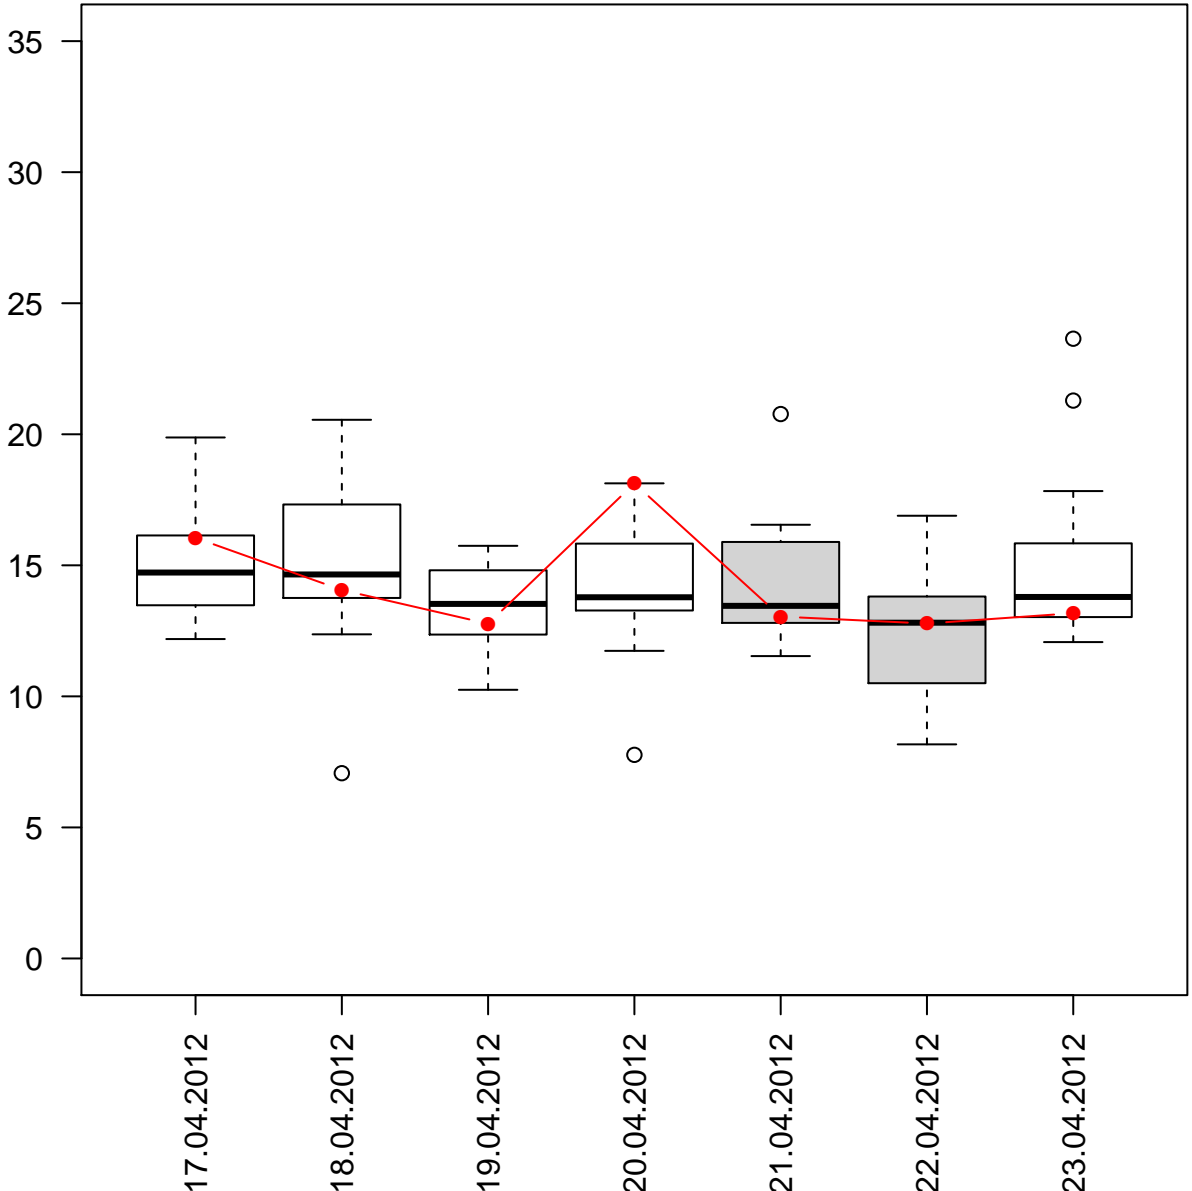

# THC-COOH loads % per weekday

Oslo

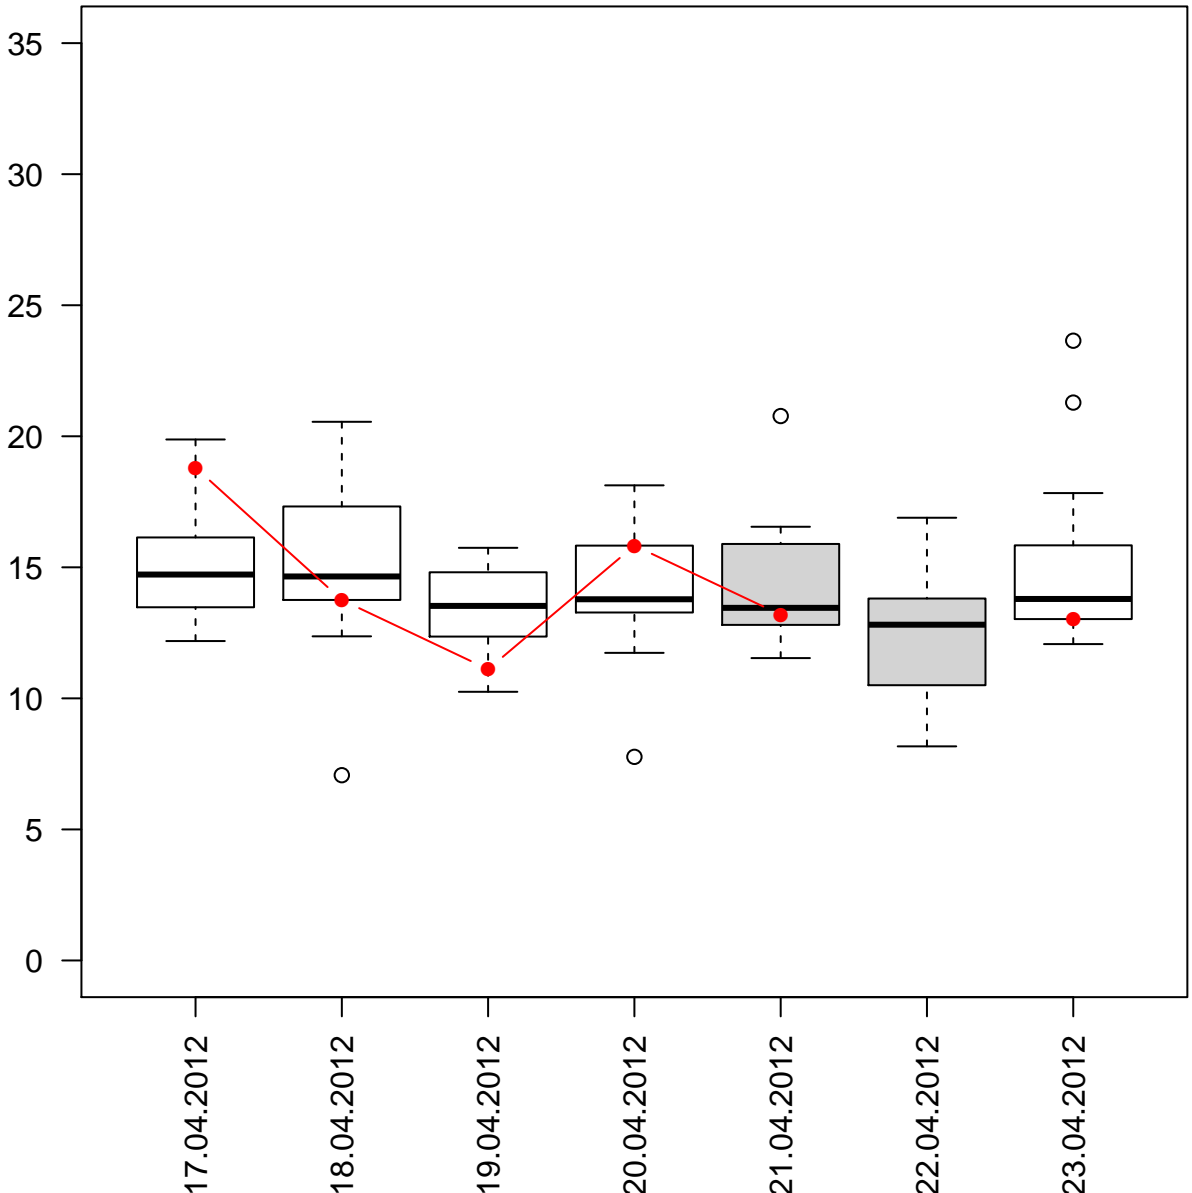

Supplement: add0109-1338-sd3.pdf [file add0109-1338-sd3.pdf]
